# Supplementary material for: HFIP-promoted para-selective alkylation of anilines and phenols with tertiary alkyl bromides
Source: Royal Society of Chemistry journal article supplement (doi:10.1039/d3qo00342f), 2023-01-01

## Supporting Information

### HFIP-promoted para-selective alkylation of anilines and phenols with tertiary alkyl bromides

Pengcheng Huang,<sup>a</sup> Xipeng Jiang,<sup>a</sup> Du Gao,<sup>a</sup> Cheng Wang,<sup>a</sup>  
Da-Qing Shi<sup>\*a</sup> and Yingsheng Zhao<sup>\*a,b</sup>

<sup>a</sup>Key Laboratory of Organic Synthesis of Jiangsu Province, College of Chemistry, Chemical Engineering and Materials Science, Soochow University, Suzhou 215123, China, \*email: [dqshi@suda.edu.cn](mailto:dqshi@suda.edu.cn); [yszhao@suda.edu.cn](mailto:yszhao@suda.edu.cn)

<sup>b</sup>School of Chemistry and Chemical Engineering, Henan Normal University, Xinxiang 453000, China

## Table of Contents

|                                                                                     |    |
|-------------------------------------------------------------------------------------|----|
| 1. Supplementary Methods .....                                                      | 3  |
| 2. Optimization Studies.....                                                        | 4  |
| 3. Preparation of substrate 3 and 5.....                                            | 6  |
| 4. Gram-Scale Reaction .....                                                        | 8  |
| 5. Modification of drug molecules.....                                              | 9  |
| 6. Mechanistic experiments .....                                                    | 9  |
| 6.1 Radical trapping experiments .....                                              | 9  |
| 6.2 Competition experiments .....                                                   | 10 |
| 6.3 1,4-dimethoxybenzene used as the substrate .....                                | 10 |
| 6.4 Toluene used as the substrate.....                                              | 10 |
| 6.5 AlCl <sub>3</sub> used as the catalyst.....                                     | 11 |
| 6.6 <sup>1</sup> H NMR and <sup>13</sup> C NMR experiments of 1a, 2a and HFIP ..... | 12 |
| 6.6.1 <sup>1</sup> H NMR experiments of mixture of 1a, 2a and HFIP.....             | 12 |
| 6.6.2 <sup>1</sup> H NMR experiments of mixture of 1a and HFIP .....                | 14 |
| 6.6.3 <sup>1</sup> H NMR experiments of mixture of 2a and HFIP .....                | 15 |
| 6.6.4 <sup>13</sup> C NMR experiments of mixture of 2a and HFIP .....               | 17 |
| 7. <sup>1</sup> H NMR and <sup>13</sup> C NMR spectra of the product .....          | 19 |
| 8. References.....                                                                  | 29 |

## 1. Supplementary Methods

**Reagents:** Unless otherwise noted, all reagents purchased from commercial suppliers and used without further purification. Column chromatography purifications performed using 200-300 and 300-400 mesh silica gel.

**Instruments:** NMR spectra recorded on Varian Inova-400 MHz, Inova-300 MHz, Bruker DRX-400 or Bruker DRX-500 instruments and calibrated using residual solvent peaks as internal reference. Multiplicities are recorded as: s = singlet, d = doublet, t = triplet, q = quartet, dd = doublet of doublets, dt = doublet of triplets, brs = broad singlet, m = multiplet. HRMS analysis carried out using a Bruker micrOTOF-Q instrument or a TOF-MS instrument.

## 2. Optimization Studies

**Table S1.** Optimization of the Reaction Conditions<sup>a</sup>

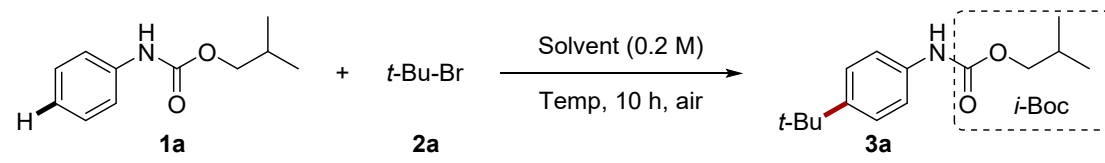

| Entry           | Solvent        | Temp (°C) | Yield (%) <sup>b</sup> |
|-----------------|----------------|-----------|------------------------|
| 1               | HFIP           | 25        | 53                     |
| 2               | HFIP           | 40        | 82                     |
| <b>3</b>        | <b>HFIP</b>    | <b>50</b> | <b>93</b>              |
| 4               | HFIP           | 60        | 90                     |
| 5               | DCE            | 50        | NR                     |
| 6               | DMSO           | 50        | NR                     |
| 7               | MeOH           | 50        | NR                     |
| 8               | <i>i</i> -PrOH | 50        | NR                     |
| 9               | <i>t</i> -BuOH | 50        | NR                     |
| 10              | TFEA           | 50        | NR                     |
| 11              | AcOH           | 50        | NR                     |
| 12              | TFA            | 50        | 10% <sup>c</sup>       |
| 13 <sup>d</sup> | HFIP           | 50        | NR                     |

<sup>a</sup>Reaction conditions: **1a** (0.2 mmol), **2a** (0.4 mmol), Solvent (1 mL), Temp, 10 h, air. <sup>b</sup>Isolated yield. <sup>c</sup>para-selectivity. <sup>d</sup>*t*-Bu-Cl or *t*-Bu-OH instead of *t*-Bu-Br.

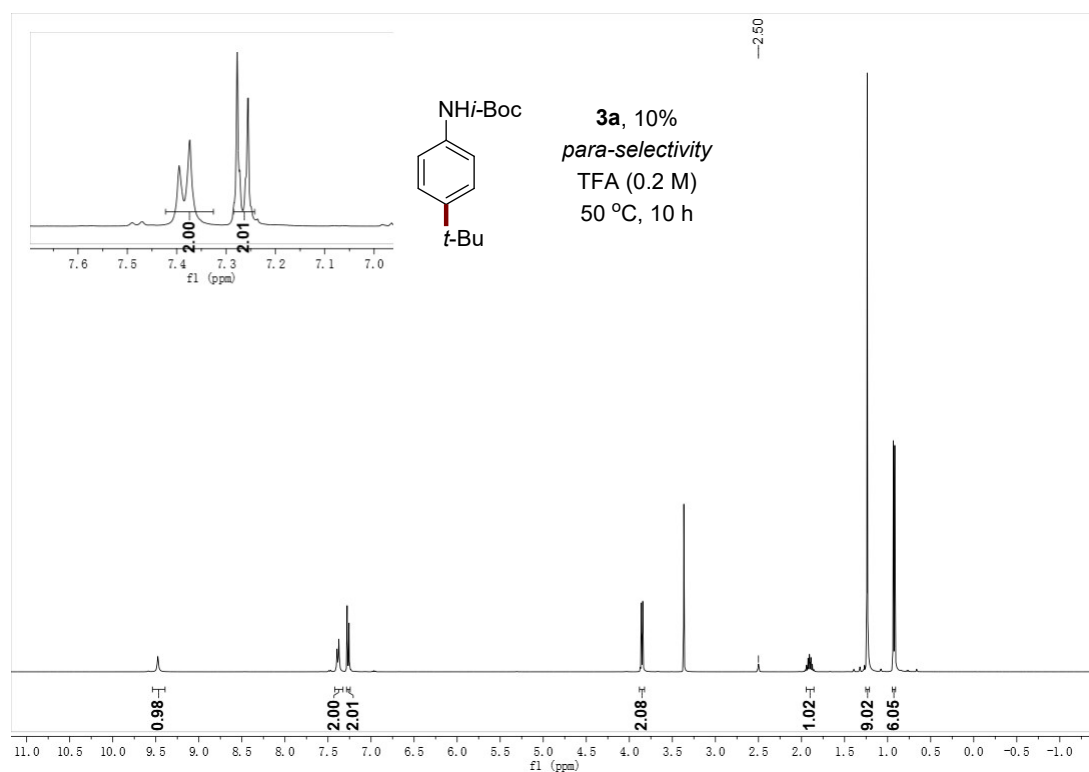

Figure S1.  $^1\text{H}$  NMR of compound **3a**

**Table S2.** Screening of solvent with hexafluoroisopropanol as the additive<sup>a</sup>

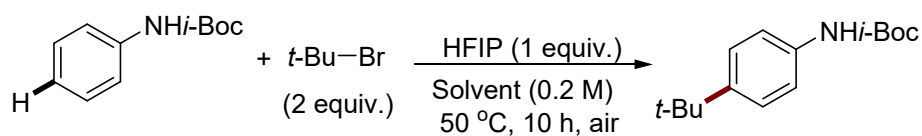

| Entry | Additive | Solvent        | Yield (%) <sup>b</sup> |
|-------|----------|----------------|------------------------|
| 1     | HFIP     | DCM            | NR                     |
| 2     | HFIP     | DCE            | NR                     |
| 3     | HFIP     | DMSO           | NR                     |
| 4     | HFIP     | MeCN           | NR                     |
| 5     | HFIP     | <i>t</i> -BuOH | NR                     |
| 6     | HFIP     | THF            | NR                     |

<sup>a</sup>Reaction conditions: **1a** (0.2 mmol), **2a** (0.4 mmol), HFIP (0.2 mmol), Solvent (1 mL), 50 °C, 10 h, air. <sup>b</sup>Isolated yield.

**Table S3.** The effect of HBr in the reaction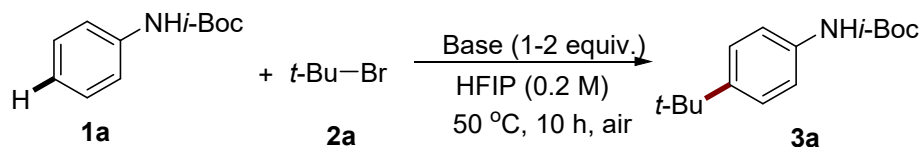

| Entry | Base                                       | Yield (%) <sup>b</sup> |
|-------|--------------------------------------------|------------------------|
| 1     | None                                       | 93                     |
| 2     | NaOAc (1 equiv.)                           | 65                     |
| 3     | NaOAc (2 equiv.)                           | 20                     |
| 4     | K <sub>2</sub> HPO <sub>4</sub> (1 equiv.) | 53                     |
| 5     | K <sub>2</sub> HPO <sub>4</sub> (2 equiv.) | 16                     |
| 6     | Et <sub>3</sub> N (1 equiv.)               | 55                     |
| 7     | Et <sub>3</sub> N (2 equiv.)               | 15                     |

<sup>a</sup>Reaction conditions: **1a** (0.2 mmol), **2a** (0.4 mmol), Base (1-2 equiv.), HFIP (1 mL), 50 °C, 10 h, air. <sup>b</sup>Isolated yield.

### 3. Preparation of substrate 3 and 5

**Propham, Methyl salicylate, Ethyl salicylate, 2, 4a** and **4i-4o** were purchased from commercial sources and used without further purification. **1a-1s** were prepared according to reported methods<sup>1</sup>. These compounds' spectra **1a**<sup>1</sup>, **1i**<sup>1</sup>, **1j-1k**<sup>2</sup>, **1l**<sup>3</sup>, **1m**<sup>4</sup>, **1o**<sup>4</sup>, **1p**<sup>5</sup>, **1p**<sup>6</sup>, **1q**<sup>7</sup>, **1r**<sup>8</sup> were known.

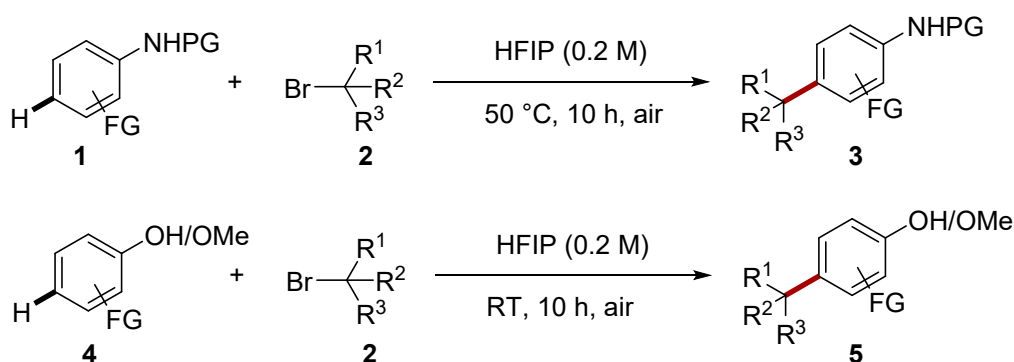

**General Procedure for *para*-alkylation of substrate:** To a solution of **1** or **4** (0.2 mmol, 1.0 equiv.) in HFIP (1.0 mL) in a 10 mL glass vial, **2** (0.4 mmol, 2 equiv.) were added and was stirred for 10 hours at 50 °C or room temperature. After the indicated reaction time, the solvent was removed under vacuum and the resulting mixture was purified by preparative thin-layer chromatography with petroleum ether/ethyl acetate = 50:1 to give the product **3** or **5**.

**Table S3.** The substrate scope of para-selective alkylation of aniline derivatives.

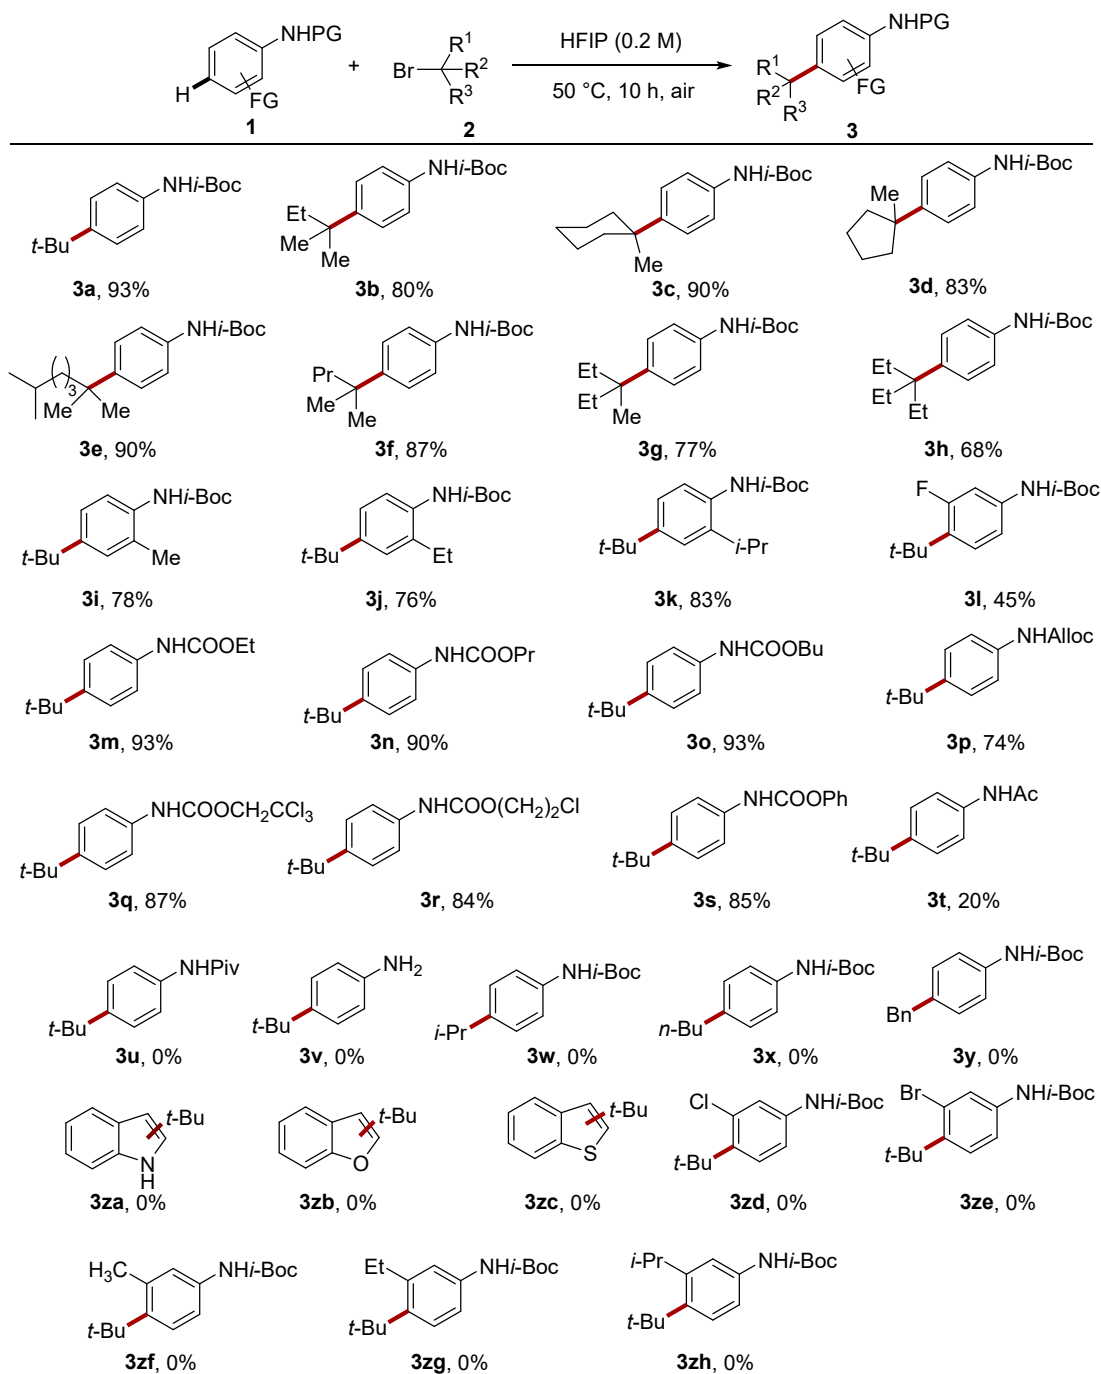

Reaction conditions: **1** (0.2 mmol), **2** (0.4 mmol), HFIP (1 mL), 50 °C, 10 h, air. Isolated yields.

**Table S4.** The substrate scope of para-selective alkylation of phenol and anisole derivatives.

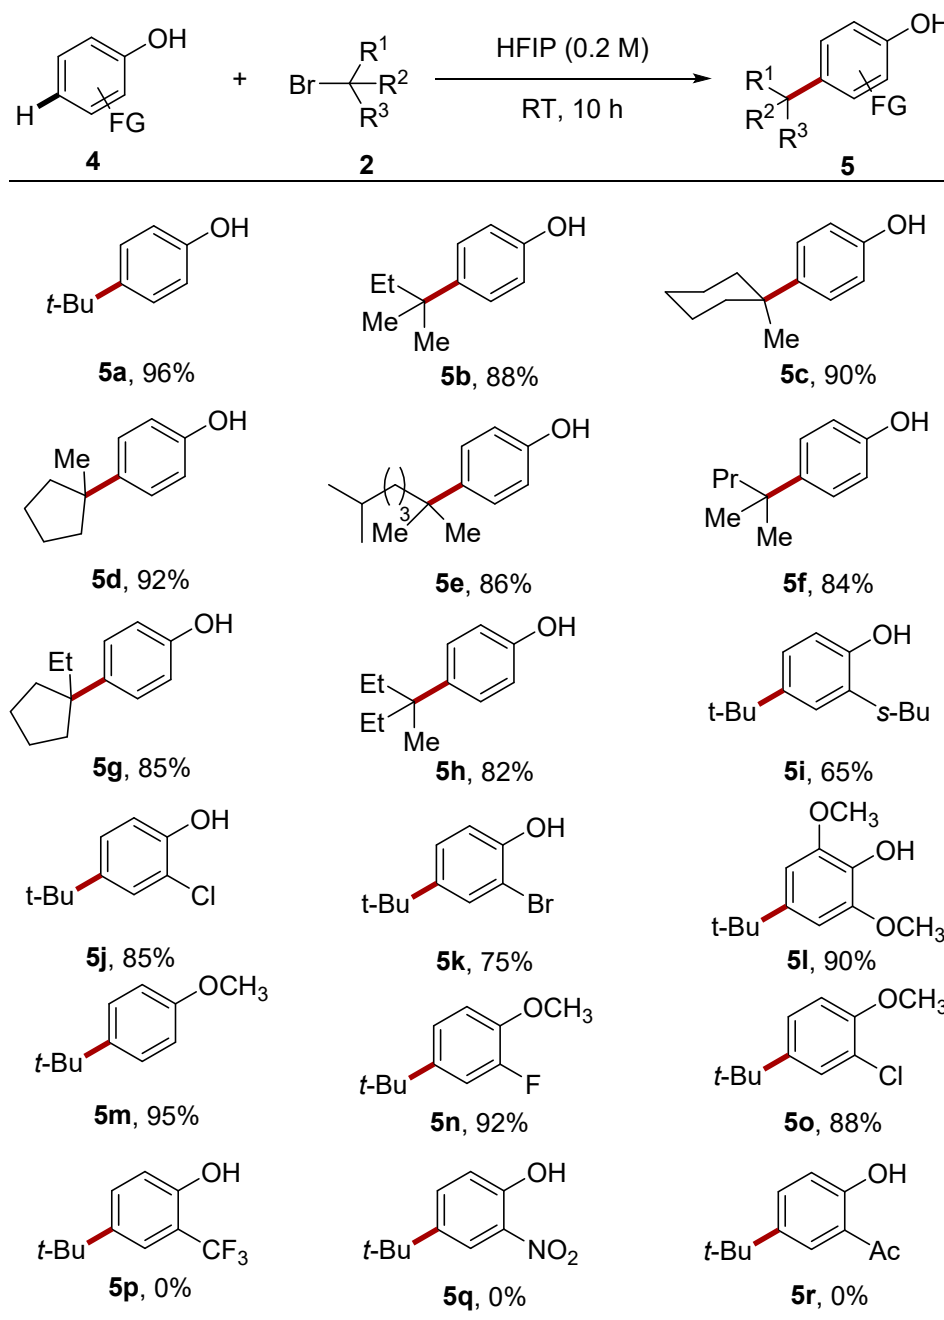

Reaction conditions: **4** (0.2 mmol), **2** (0.4 mmol), HFIP (1.0 mL), room temperature (23-25 °C), 10 h, air. Isolated yields.

#### 4. Gram-Scale Reaction

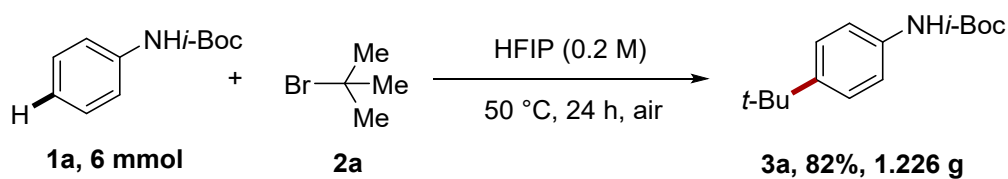



**Procedure of Gram-scale reaction 3a:** To a solution of **1a** (6 mmol, 1.16g) in HFIP (20 mL) in a 50 mL glass vial, **2a** (12 mmol, 1.64 g) were added and was stirred for 24 hours at 50 °C. After the indicated reaction time, the solvent was removed under vacuum and the resulting mixture was purified by preparative thin-layer chromatography with petroleum ether/ethyl acetate = 50:1 to give the product **3a** (82%, 1.23g).

## 5. Modification of drug molecules

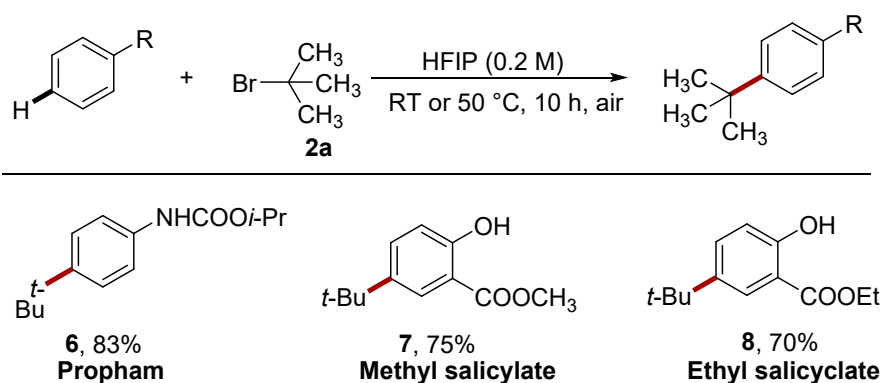

**Procedure of modification of drug molecules:** To a solution of **6** or **7** or **8** (0.2 mmol, 1.0 equiv.) in HFIP (1.0 mL) in a 10 mL glass vial, **2a** (0.4 mmol, 2 equiv.) were added and was stirred for 10 hours at 50 °C or room temperature. After the indicated reaction time, the solvent was removed under vacuum and the resulting mixture was purified by preparative thin-layer chromatography with petroleum ether/ethyl acetate = 50:1 to give the product.

## 6. Mechanistic experiments

### 6.1 Radical trapping experiments

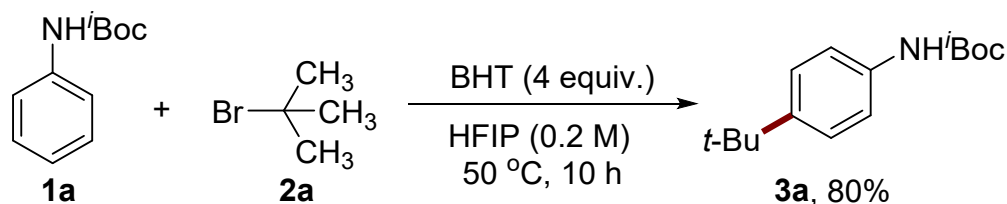

To a solution of **1a** (0.2 mmol, 38.6 mg) and **BHT** (0.8 mmol, 88 mg) in HFIP (1 mL) in a 10 mL glass vial, **2a** (0.4 mmol, 54.8 mg) were added and was stirred for 10 hours at 50 °C. After the indicated reaction time, the solvent was removed under vacuum and the resulting mixture was purified by preparative thin-layer chromatography with petroleum ether/ethyl acetate = 50:1 to give the product **3a** (80%, 39.8 mg).

## 6.2 Competition experiments

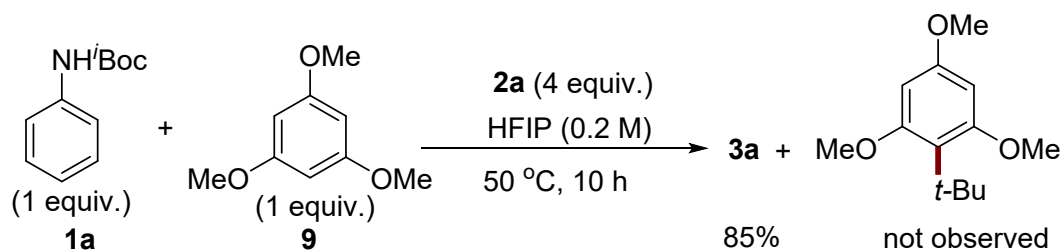

To a solution of **1a** (0.2 mmol, 38.6 mg) and 1, 3, 5-trimethoxybenzene (**9**, 0.2 mmol, 33.6 mg) in HFIP (2 mL) in a 10 mL glass vial, **2a** (0.8 mmol, 109.6 mg) were added and was stirred for 10 hours at 50 °C. After the indicated reaction time, the solvent was removed under vacuum and the resulting mixture was purified by preparative thin-layer chromatography with petroleum ether/ethyl acetate = 40:1 to give the product **3a** (85%, 42.3 mg) and the starting material **9** (95%, 31.9 mg).

## 6.3 1,4-dimethoxybenzene used as the substrate

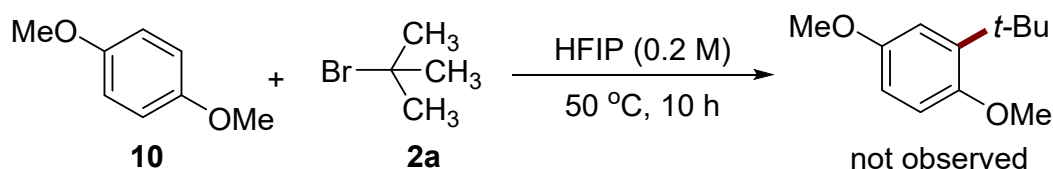

To a solution of 1, 4-dimethoxybenzene (**10**, 0.2 mmol, 27.6 mg) in HFIP (1 mL) in a 10 mL glass vial, **2a** (0.4 mmol, 54.8 mg) were added and was stirred for 10 hours at 50 °C. After the indicated reaction time, the solvent was removed under vacuum and the resulting mixture was purified by preparative thin-layer chromatography with petroleum ether/ethyl acetate = 40:1 to give the starting material **10** (96%, 26.5 mg).

## 6.4 Toluene used as the substrate

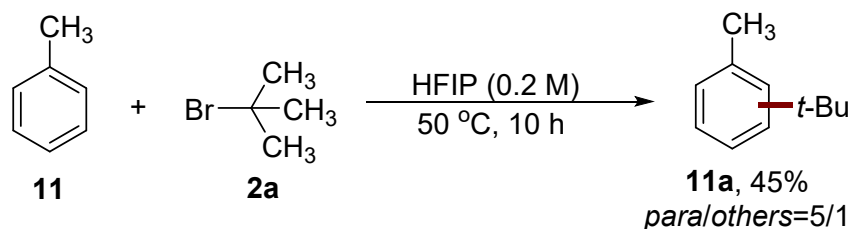

To a solution of Toluene (**11**, 0.2 mmol, 18.4 mg) in HFIP (1 mL) in a 10 mL glass vial, **2a** (0.4 mmol, 54.8 mg) were added and was stirred for 10 hours at 50 °C. After the indicated reaction time, the solvent was removed under vacuum and the resulting mixture was purified by preparative thin-layer chromatography with petroleum ether/ethyl acetate = 40:1 to give the product **11a** (45%, 13.3 mg).

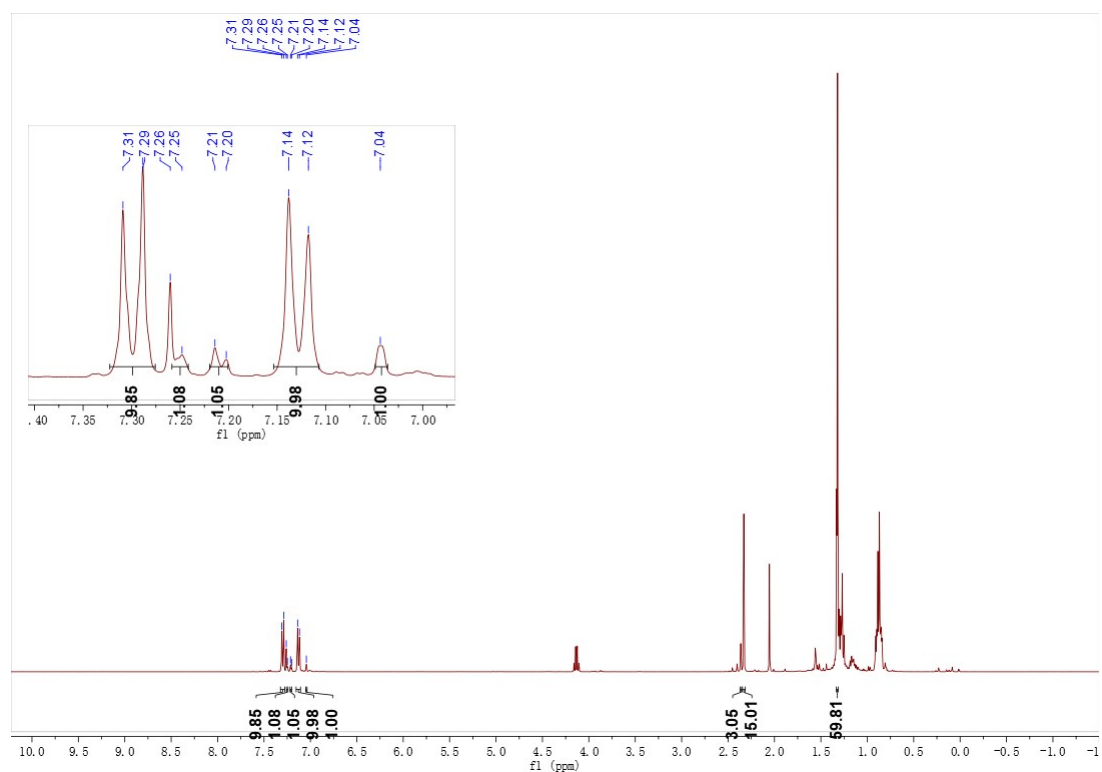

Figure S2.  $^1\text{H}$  NMR of compound **11a**

### 6.5 $\text{AlCl}_3$ used as the catalyst

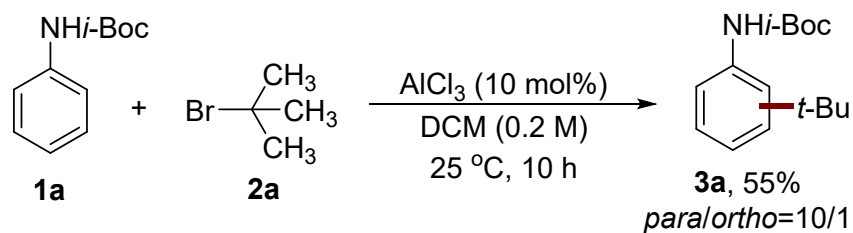

To a solution of **1a** (0.2 mmol, 38.6 mg) and  $\text{AlCl}_3$  (0.02 mmol, 2.7 mg) in DCM (1 mL) in a 10 mL glass vial, **2a** (0.4 mmol, 54.8 mg) were added and was stirred for 10 hours at 25 °C. After the indicated reaction time, the solvent was removed under vacuum and the resulting mixture was purified by preparative thin-layer chromatography with petroleum ether/ethyl acetate = 50:1 to give the product **3a/3a'** (55%, 27.4 mg).

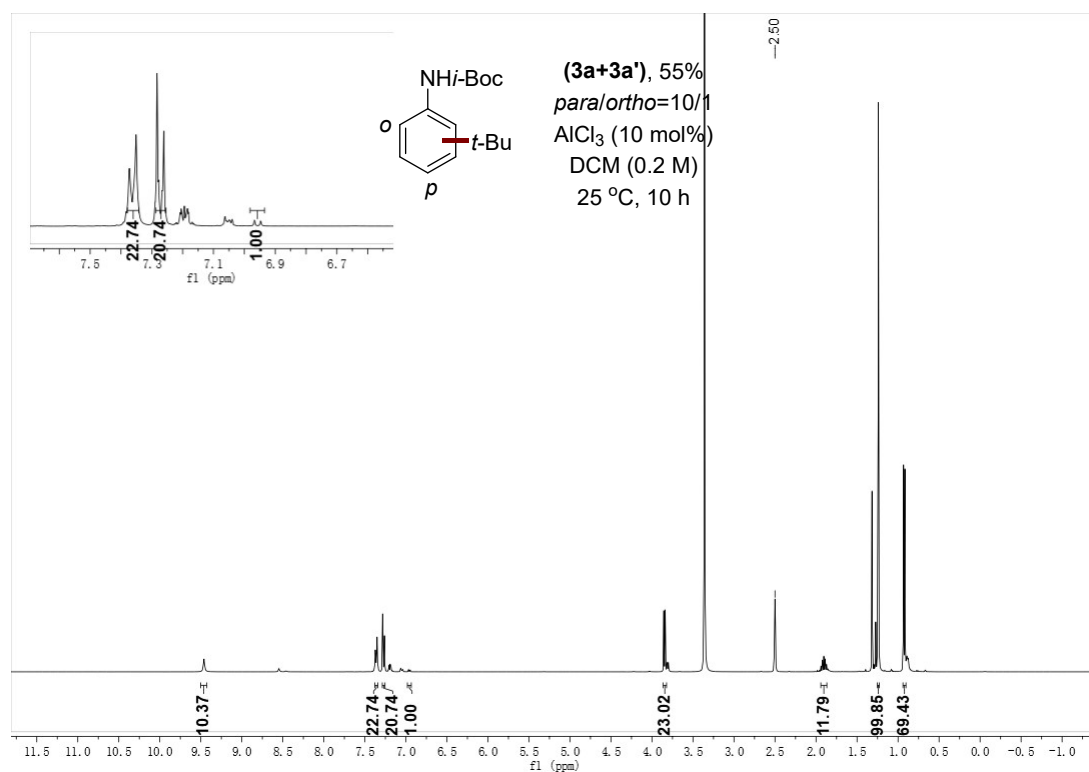

Figure S3. <sup>1</sup>H NMR of compound 3a/3a'

## 6.6 <sup>1</sup>H NMR and <sup>13</sup>C NMR experiments of 1a, 2a and HFIP

### 6.6.1 <sup>1</sup>H NMR experiments of mixture of 1a, 2a and HFIP

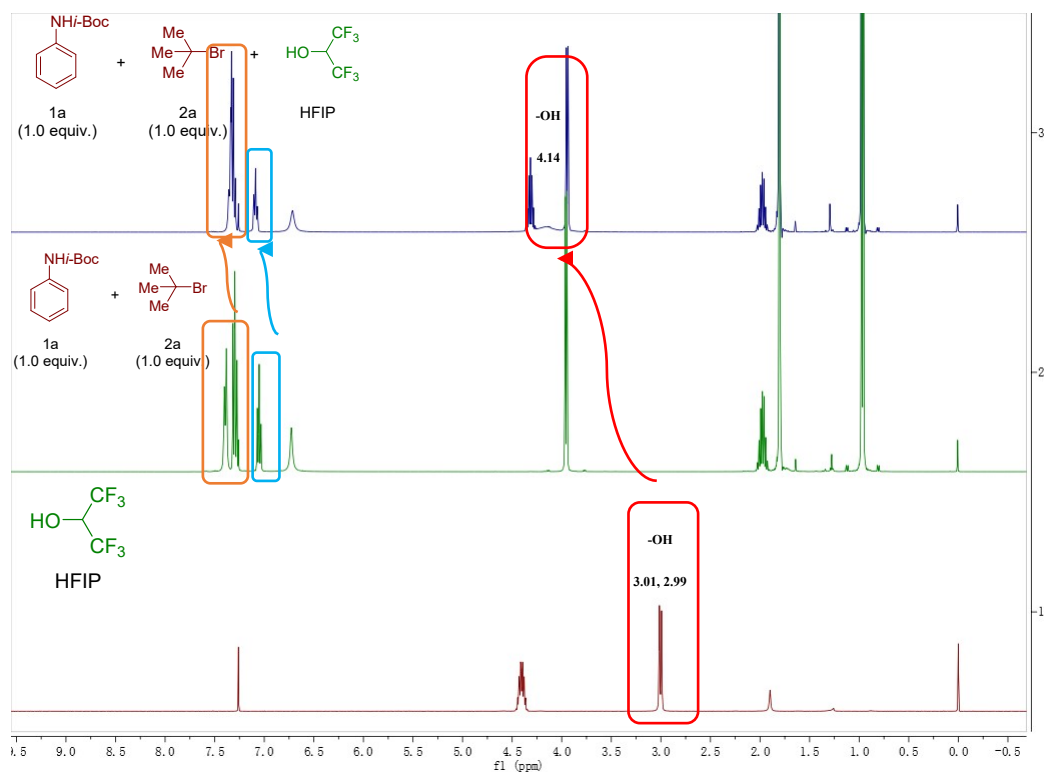

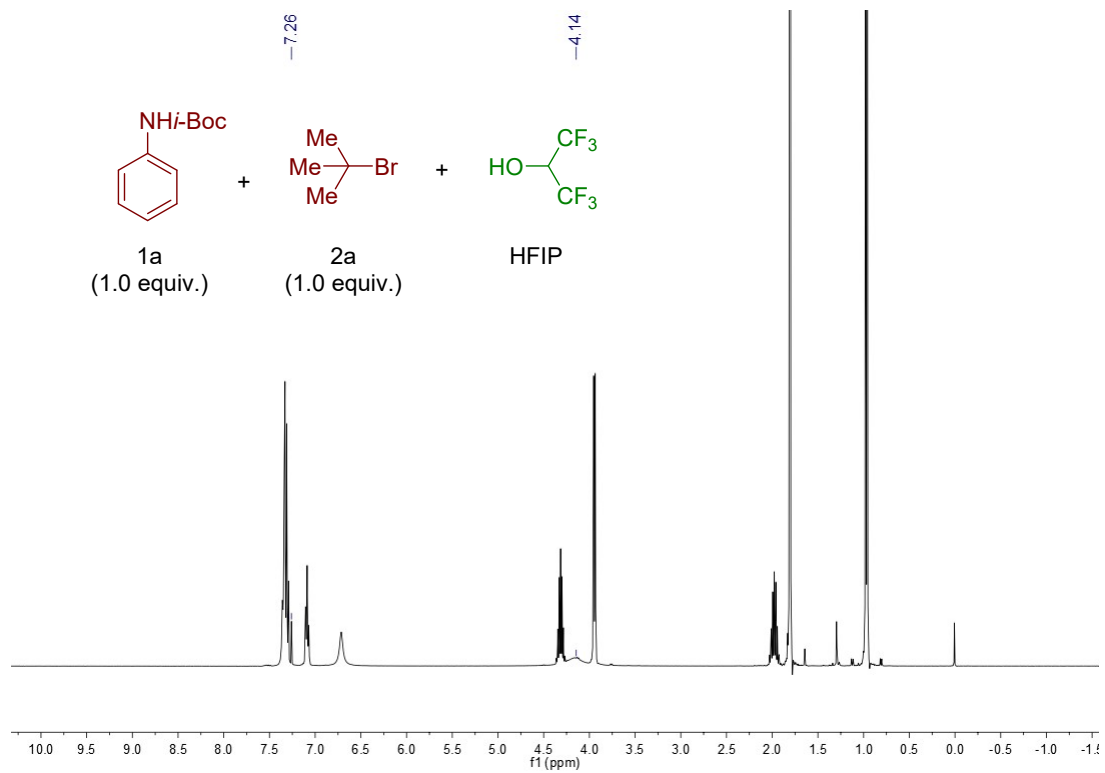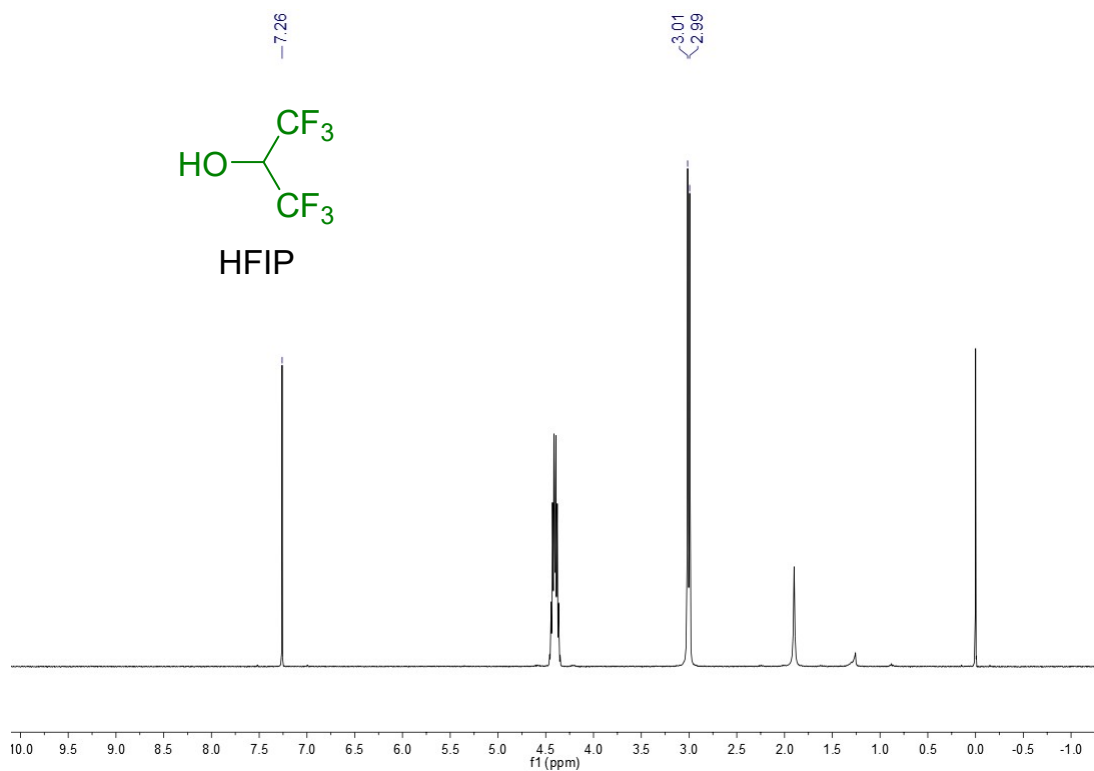

### 6.6.2 <sup>1</sup>H NMR experiments of mixture of 1a and HFIP

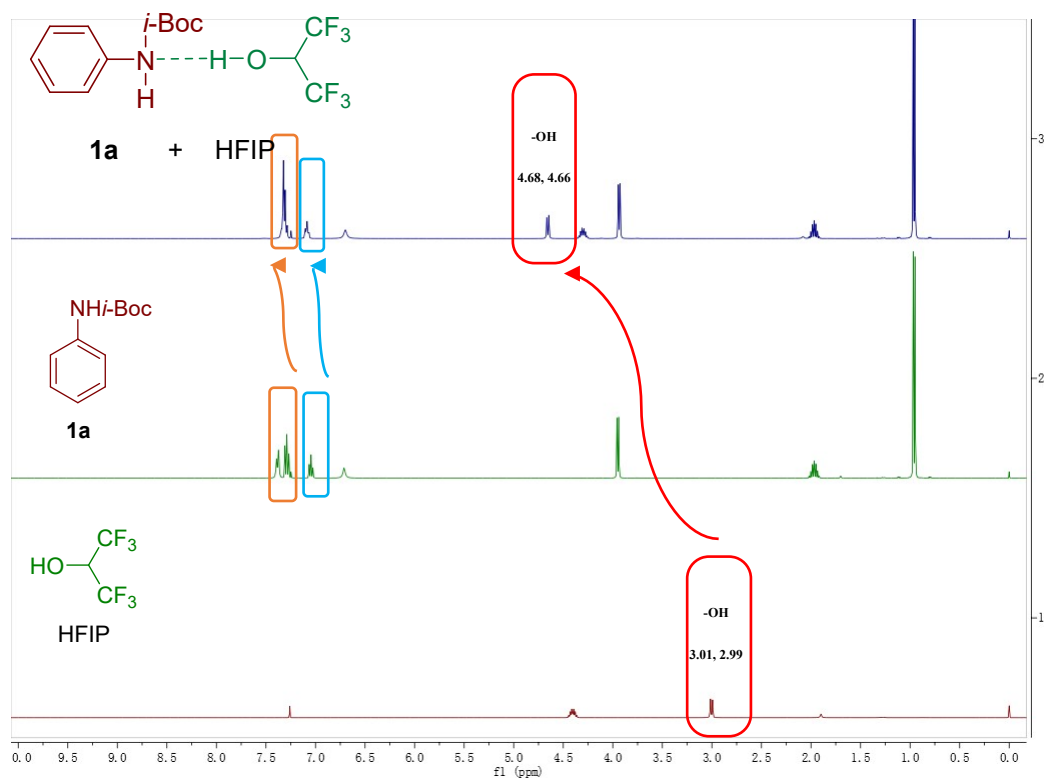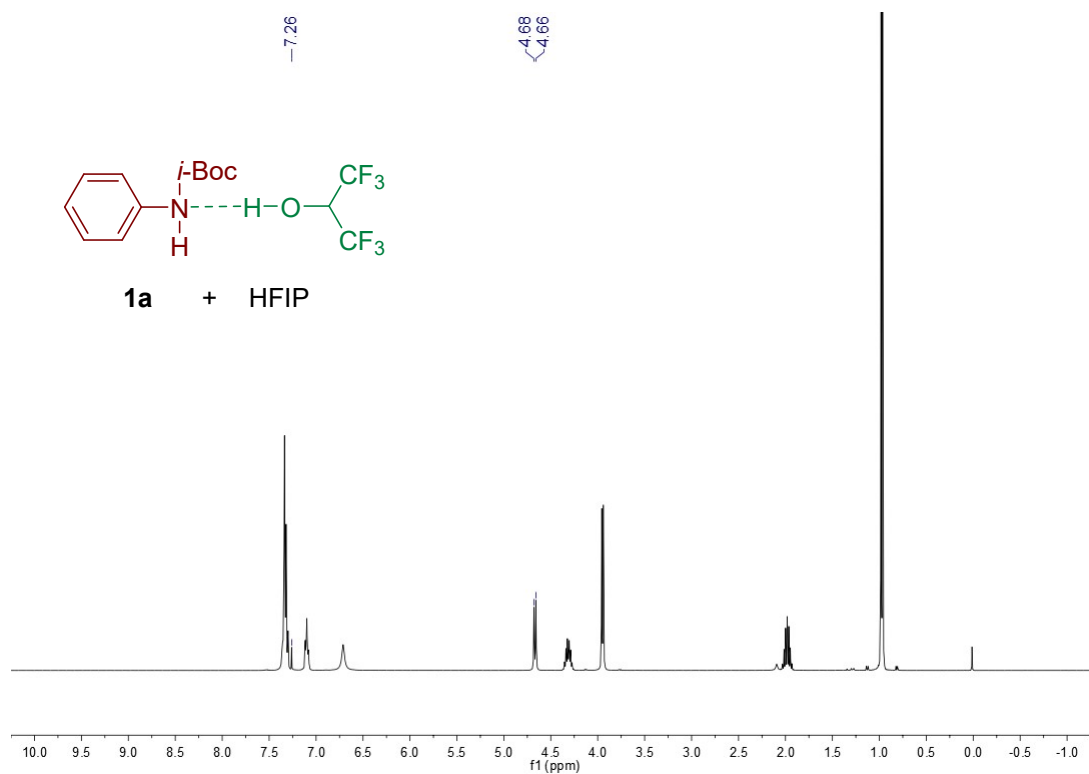

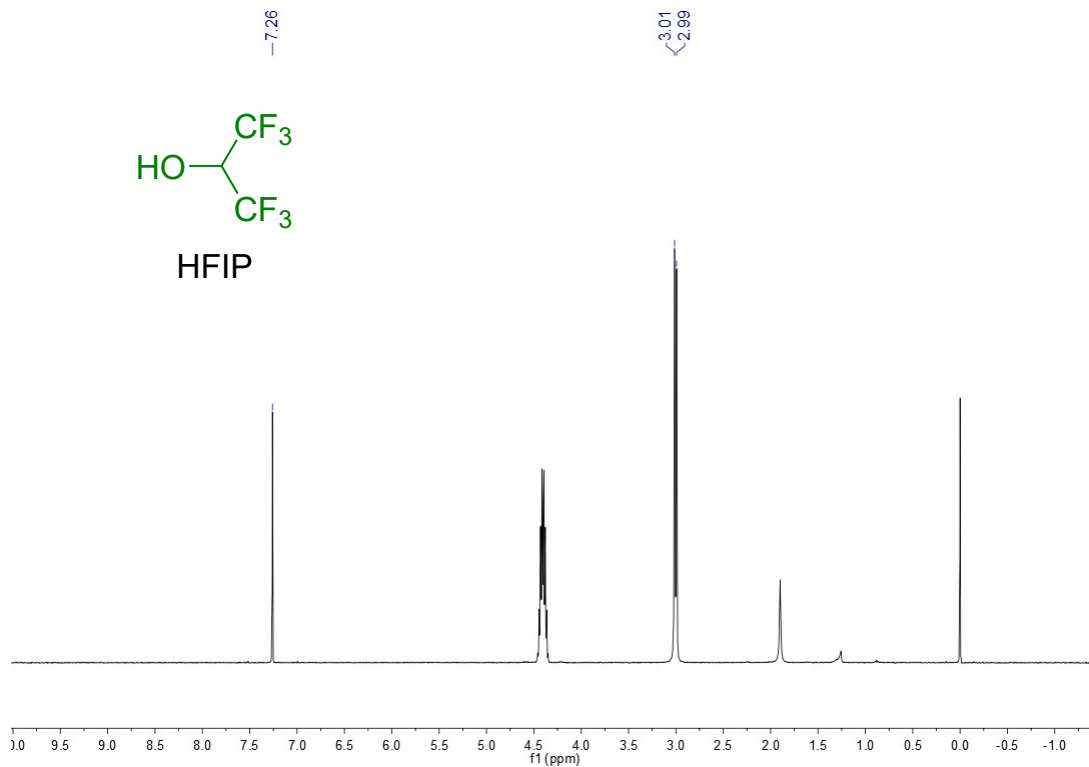

### 6.6.3 <sup>1</sup>H NMR experiments of mixture of 2a and HFIP

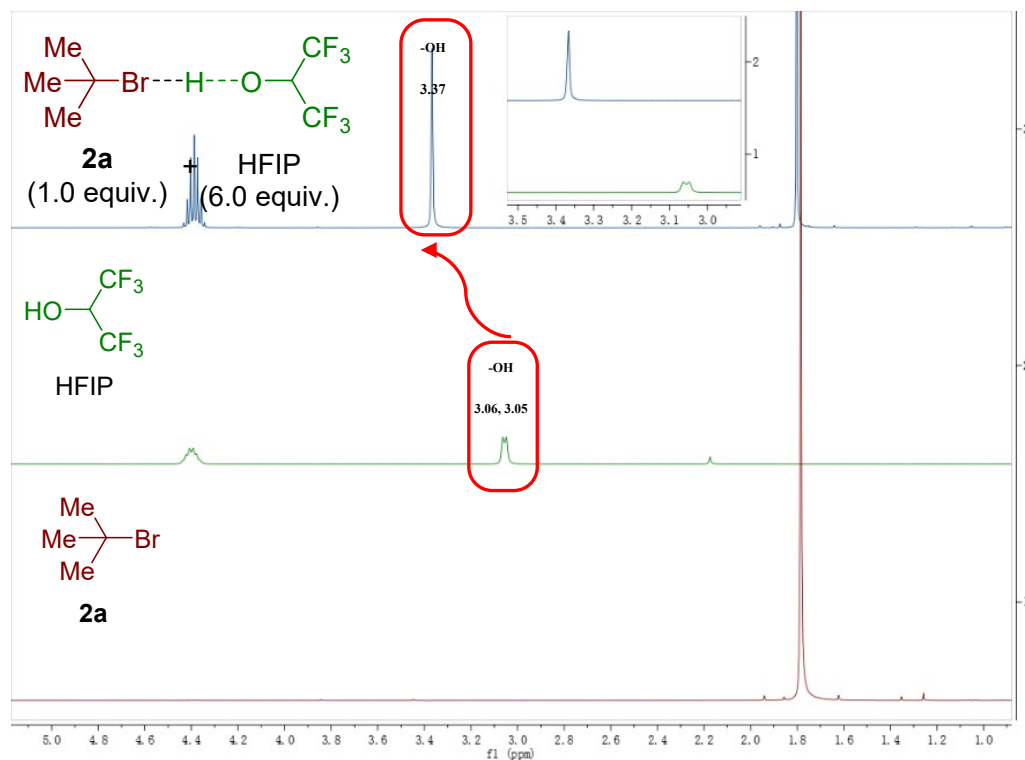

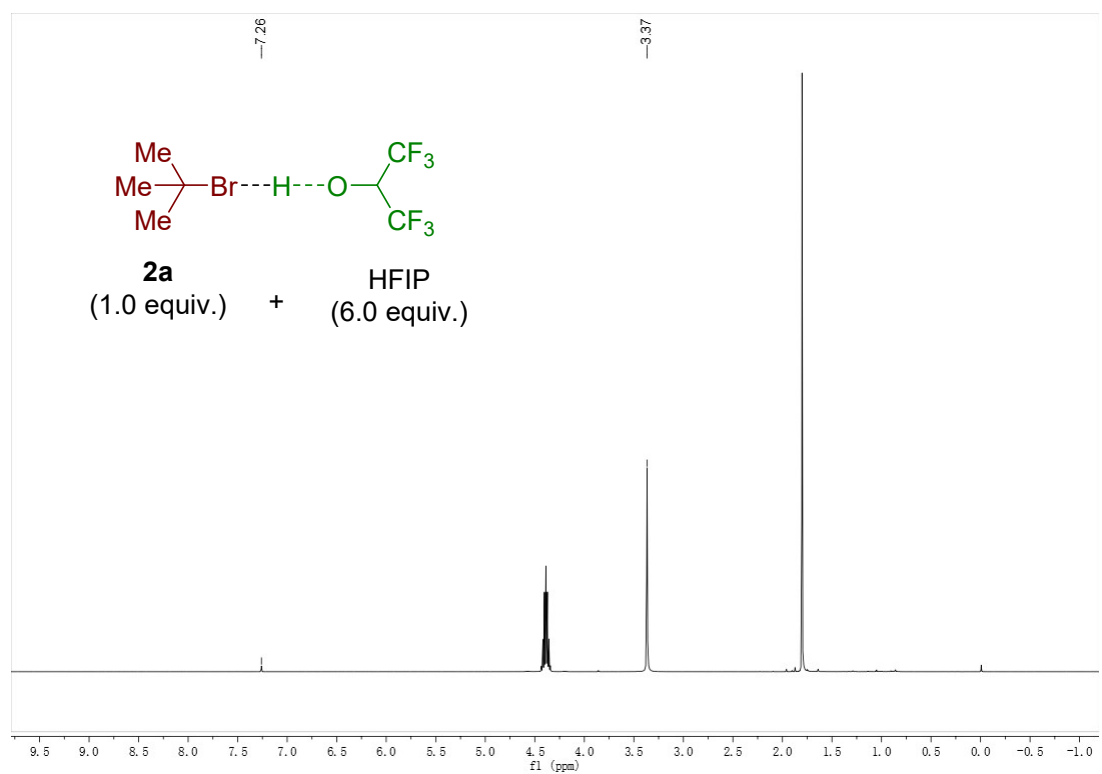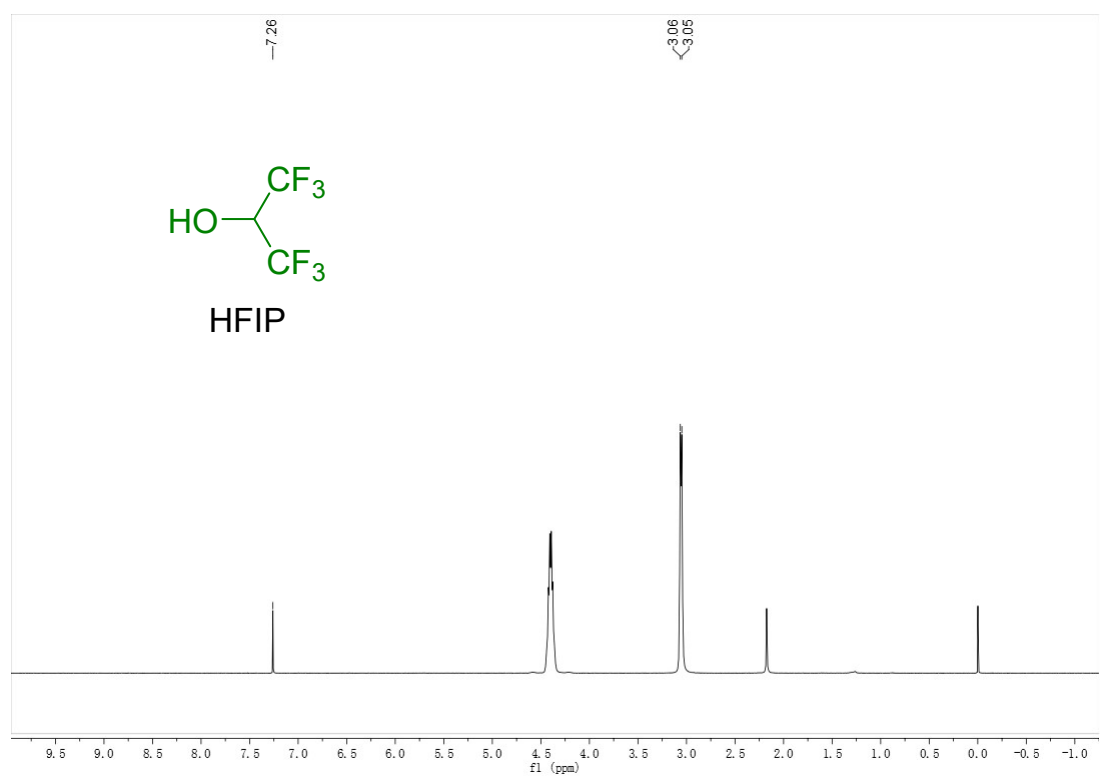



### 6.6.4 $^{13}\text{C}$ NMR experiments of mixture of 2a and HFIP

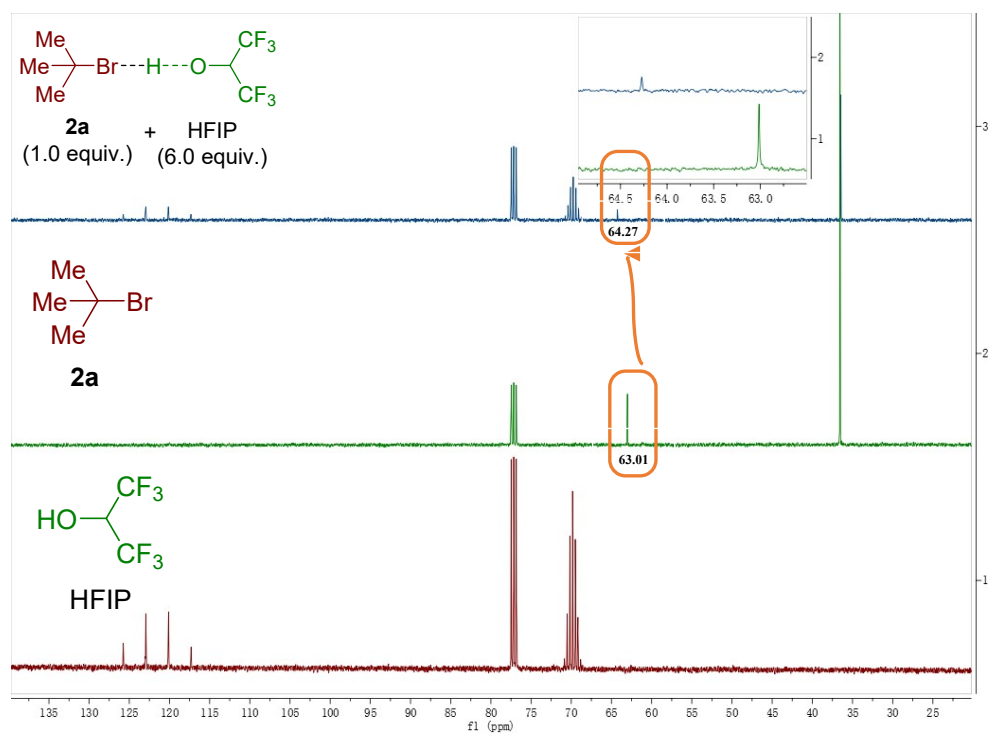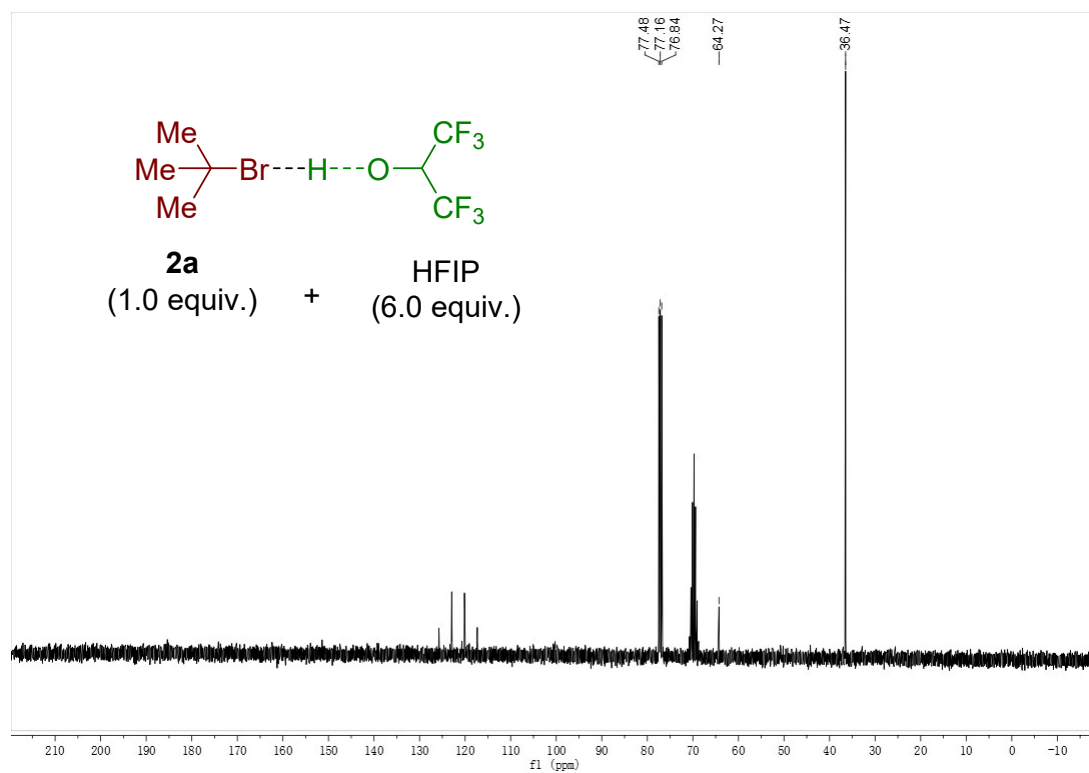

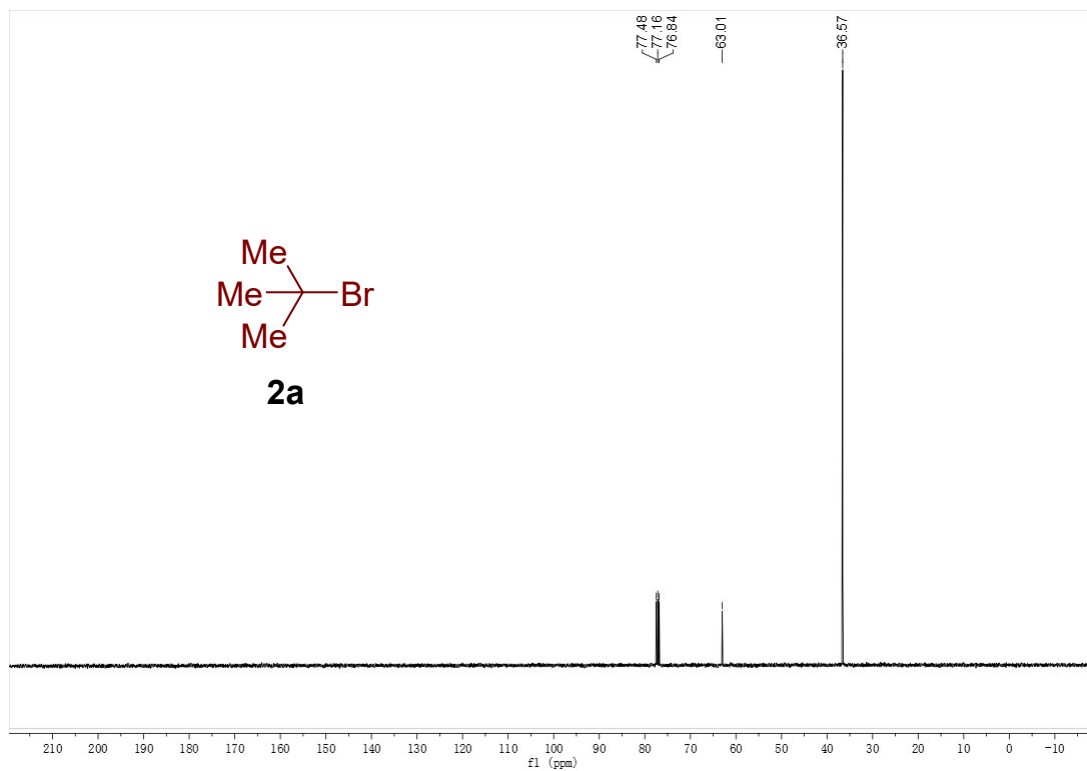

## 7. $^1\text{H}$ NMR and $^{13}\text{C}$ NMR spectra of the product

### isobutyl (4-(*tert*-butyl)phenyl)carbamate (3a)

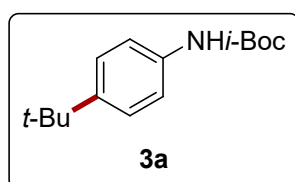

Pale yellow oil. Isolated yield: 46.3 mg, 93%.  $^1\text{H}$  NMR (400 MHz,  $\text{DMSO-}d_6$ )  $\delta$  9.48 (s, 1H, NH), 7.38 (d,  $J = 8.4$  Hz, 2H, ArH), 7.27 (d,  $J = 8.8$  Hz, 2H, ArH), 3.85 (d,  $J = 6.7$  Hz, 2H,  $\text{CH}_2$ ), 1.96-1.86 (m, 1H, CH), 1.24 (s, 9H,  $\text{C}(\text{CH}_3)_3$ ), 0.93 (d,  $J = 6.7$  Hz, 6H,  $\text{C}(\text{CH}_3)_2$ ).  $^{13}\text{C}$  NMR (100 MHz,  $\text{DMSO-}d_6$ )  $\delta$  153.7, 144.5, 136.7, 125.3, 118.0, 70.0, 33.9, 31.2, 27.6, 18.9. HRMS Calcd for  $\text{C}_{15}\text{H}_{23}\text{NO}_2\text{Na}$   $[\text{M}+\text{Na}]^+$ : 272.1621; Found: 272.1624.

### isobutyl (4-(*tert*-pentyl)phenyl)carbamate (3b)

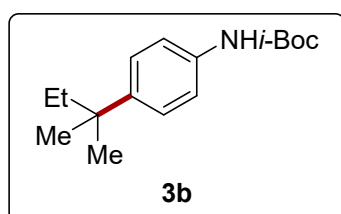

Pale yellow oil. Isolated yield: 42.1 mg, 80%.  $^1\text{H}$  NMR (400 MHz,  $\text{DMSO-}d_6$ )  $\delta$  9.48 (s, 1H, NH), 7.38 (d,  $J = 8.3$  Hz, 2H, ArH), 7.20 (d,  $J = 8.7$  Hz, 2H, ArH), 3.85 (d,  $J = 6.7$  Hz, 2H,  $\text{CH}_2$ ), 1.96-1.86 (m, 1H, CH), 1.56 (q,  $J = 7.4$  Hz, 2H,  $\text{CH}_2$ ), 1.19 (s, 6H,  $\text{C}(\text{CH}_3)_2$ ), 0.92 (d,  $J = 6.7$  Hz, 6H,  $\text{C}(\text{CH}_3)_2$ ), 0.59 (t,  $J = 7.4$  Hz, 3H,  $\text{CH}_3$ ).  $^{13}\text{C}$  NMR (100 MHz,  $\text{DMSO-}d_6$ )  $\delta$  153.7, 142.7, 136.5, 125.9, 118.0, 70.0, 37.0, 36.2, 28.3, 27.6, 18.9, 9.0. HRMS Calcd for  $\text{C}_{16}\text{H}_{25}\text{NO}_2\text{Na}$   $[\text{M}+\text{Na}]^+$ : 286.1778; Found: 286.1782.

### isobutyl (4-(1-methylcyclohexyl)phenyl)carbamate (3c)

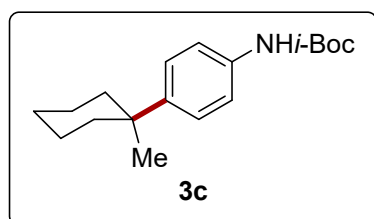

Pale yellow oil. Isolated yield: 52.0 mg, 90%.  $^1\text{H}$  NMR (400 MHz,  $\text{DMSO-}d_6$ )  $\delta$  9.49 (s, 1H, NH), 7.39 (d,  $J = 8.4$  Hz, 2H, ArH), 7.24 (d,  $J = 8.8$  Hz, 2H, ArH), 3.85 (d,  $J = 6.7$  Hz, 2H,  $\text{CH}_2$ ), 1.96-1.87 (m, 3H, CH,  $\text{CH}_2$ ), 1.51-1.28 (m, 8H,  $4 \times \text{CH}_2$ ), 1.09 (s, 3H,  $\text{CH}_3$ ), 0.93 (d,  $J = 6.7$  Hz, 6H,  $\text{C}(\text{CH}_3)_2$ ).  $^{13}\text{C}$  NMR (100 MHz,  $\text{DMSO-}d_6$ )  $\delta$  153.7, 143.2, 136.4, 125.9, 118.2, 69.9, 37.4, 37.0, 27.6, 25.9, 22.2, 18.9. HRMS Calcd for  $\text{C}_{18}\text{H}_{28}\text{NO}_2$   $[\text{M}+\text{H}]^+$ : 290.2115; Found: 290.2113.

### isobutyl (4-(1-methylcyclopentyl)phenyl)carbamate (3d)

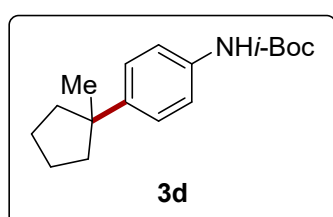

Pale yellow oil. Isolated yield: 45.7 mg, 83%.  $^1\text{H}$  NMR (400 MHz,  $\text{DMSO-}d_6$ )  $\delta$  9.48 (s, 1H, NH), 7.36 (d,  $J = 8.3$  Hz, 2H, ArH), 7.20 (d,  $J = 8.8$  Hz, 2H, ArH), 3.85 (d,  $J =$

6.7 Hz, 2H, CH<sub>2</sub>), 1.96-1.86 (m, 1H, CH), 1.82-1.58 (m, 8H, 4 × CH<sub>2</sub>), 1.16 (s, 3H, CH<sub>3</sub>), 0.92 (d, *J* = 6.7 Hz, 6H, C(CH<sub>3</sub>)<sub>2</sub>). <sup>13</sup>C NMR (100 MHz, DMSO-*d*<sub>6</sub>) δ 153.7, 144.6, 136.6, 126.0, 118.0, 70.0, 46.2, 39.3, 29.1, 27.6, 23.2, 18.9. HRMS Calcd for C<sub>17</sub>H<sub>26</sub>NO<sub>2</sub> [M+H]<sup>+</sup>: 276.1958; Found: 276.1966.

#### isobutyl (4-(2,6-dimethylheptan-2-yl)phenyl)carbamate (3e)

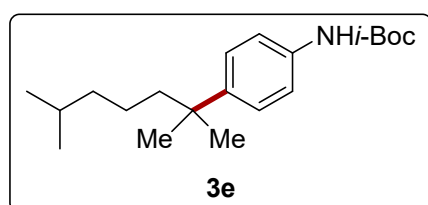

Pale yellow oil. Isolated yield: 57.4 mg, 90%. <sup>1</sup>H NMR (400 MHz, DMSO-*d*<sub>6</sub>) δ 9.48 (s, 1H, NH), 7.38 (d, *J* = 8.2 Hz, 2H, ArH), 7.19 (d, *J* = 8.8 Hz, 2H, ArH), 3.85 (d, *J* = 6.7 Hz, 2H, CH<sub>2</sub>), 1.96-1.86 (m, 1H, CH), 1.53-1.45 (m, 2H, CH<sub>2</sub>), 1.44-1.36

(m, 1H, CH), 1.20 (s, 6H, C(CH<sub>3</sub>)<sub>2</sub>), 1.06-0.96 (m, 4H, 2×CH<sub>2</sub>), 0.92 (d, *J* = 6.7 Hz, 6H, C(CH<sub>3</sub>)<sub>2</sub>), 0.75 (d, *J* = 6.6 Hz, 6H, C(CH<sub>3</sub>)<sub>2</sub>). <sup>13</sup>C NMR (100 MHz, DMSO-*d*<sub>6</sub>) δ 153.7, 143.0, 136.5, 125.7, 117.9, 69.9, 44.1, 39.0, 36.8, 28.8, 27.6, 27.2, 22.4, 22.0, 18.9. HRMS Calcd for C<sub>20</sub>H<sub>33</sub>NO<sub>2</sub>Na [M+Na]<sup>+</sup>: 342.2404; Found: 342.2397.

#### isobutyl (4-(2-methylpentan-2-yl)phenyl)carbamate (3f)

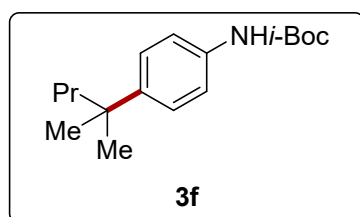

Pale yellow oil. Isolated yield: 48.2 mg, 87%. <sup>1</sup>H NMR (400 MHz, DMSO-*d*<sub>6</sub>) δ 9.48 (s, 1H, NH), 7.39 (d, *J* = 8.2 Hz, 2H, ArH), 7.19 (d, *J* = 8.7 Hz, 2H, ArH), 3.85 (d, *J* = 6.7 Hz, 2H, CH<sub>2</sub>), 1.96-1.86 (m, 1H, CH), 1.52-1.47 (m, 2H, CH<sub>2</sub>), 1.20 (s, 6H, C(CH<sub>3</sub>)<sub>2</sub>), 1.02-0.96 (m, 2H,

CH<sub>2</sub>), 0.92 (d, *J* = 6.7 Hz, 6H, C(CH<sub>3</sub>)<sub>2</sub>), 0.76 (t, *J* = 7.3 Hz, 3H, CH<sub>3</sub>). <sup>13</sup>C NMR (100 MHz, DMSO-*d*<sub>6</sub>) δ 153.7, 143.0, 136.6, 125.7, 117.9, 69.9, 46.5, 36.9, 28.8, 27.6, 18.9, 17.6, 14.6. HRMS Calcd for C<sub>17</sub>H<sub>27</sub>NO<sub>2</sub>Na [M+Na]<sup>+</sup>: 300.1934; Found: 300.1938.

#### isobutyl (4-(3-methylpentan-3-yl)phenyl)carbamate (3g)

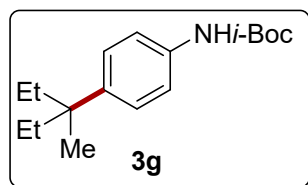

Pale yellow oil. Isolated yield: 42.7 mg, 77%. <sup>1</sup>H NMR (400 MHz, DMSO-*d*<sub>6</sub>) δ 9.48 (s, 1H, NH), 7.39 (d, *J* = 8.3 Hz, 2H, ArH), 7.15 (d, *J* = 8.7 Hz, 2H, ArH), 3.85 (d, *J* = 6.7 Hz, 2H, CH<sub>2</sub>), 1.96-1.86 (m, 1H, CH), 1.70-1.61 (m, 2H, CH<sub>2</sub>),

1.51-1.42 (m, 2H, CH<sub>2</sub>), 1.14 (s, 3H, CH<sub>3</sub>), 0.92 (d, *J* = 6.7 Hz, 6H, C(CH<sub>3</sub>)<sub>2</sub>), 0.58 (t, *J* = 7.3 Hz, 6H, 2 × CH<sub>3</sub>). <sup>13</sup>C NMR (100 MHz, DMSO-*d*<sub>6</sub>) δ 153.7, 140.8, 136.5, 126.6, 117.9, 70.0, 40.3, 34.6, 27.6, 22.6, 18.9, 8.6. HRMS Calcd for C<sub>17</sub>H<sub>27</sub>NO<sub>2</sub>Na [M+Na]<sup>+</sup>: 300.1934; Found: 300.1928.

### isobutyl (4-(3-ethylpentan-3-yl)phenyl)carbamate (3h)

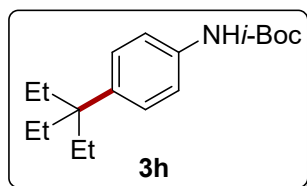

Pale yellow oil. Isolated yield: 39.6 mg, 68%.  $^1\text{H NMR}$  (400 MHz,  $\text{DMSO-}d_6$ )  $\delta$  9.49 (s, 1H, NH), 7.38 (d,  $J = 8.3$  Hz, 2H, ArH), 7.18 (d,  $J = 8.9$  Hz, 2H ArH), 3.85 (d,  $J = 6.7$  Hz, 2H,  $\text{CH}_2$ ), 1.96-1.86 (m, 1H, CH), 1.58 (q,  $J = 7.4$  Hz, 6H,  $3 \times \text{CH}_2$ ), 0.92 (d,  $J = 6.7$  Hz, 6H,  $\text{C}(\text{CH}_3)_2$ ), 0.57 (t,  $J = 7.3$  Hz, 9H,  $3 \times \text{CH}_3$ ).  $^{13}\text{C NMR}$  (100 MHz,  $\text{DMSO-}d_6$ )  $\delta$  153.7, 140.5, 136.4, 126.8, 117.9, 69.9, 42.7, 28.0, 27.6, 18.9, 7.8. **HRMS** Calcd for  $\text{C}_{18}\text{H}_{29}\text{NO}_2\text{Na}$   $[\text{M}+\text{Na}]^+$ : 314.2091; Found: 314.2085.

### isobutyl (4-(*tert*-butyl)-2-methylphenyl)carbamate (3i)

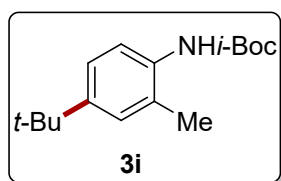

Pale yellow oil. Isolated yield: 41.0 mg, 78%.  $^1\text{H NMR}$  (400 MHz,  $\text{DMSO-}d_6$ )  $\delta$  8.70 (s, 1H, NH), 7.21 (d,  $J = 8.3$  Hz, 1H, ArH), 7.18 (d,  $J = 2.2$  Hz, 1H, ArH), 7.15 (dd,  $J = 8.3, 2.4$  Hz, 1H, ArH), 3.84 (d,  $J = 6.7$  Hz, 2H,  $\text{CH}_2$ ), 2.19 (s, 3H,  $\text{CH}_3$ ), 1.95-1.85 (m, 1H, CH), 1.26 (s, 9H,  $\text{C}(\text{CH}_3)_3$ ), 0.92 (d,  $J = 6.7$  Hz, 6H,  $\text{C}(\text{CH}_3)_2$ ).  $^{13}\text{C NMR}$  (100 MHz,  $\text{DMSO-}d_6$ )  $\delta$  154.7, 147.2, 133.9, 131.3, 127.0, 124.6, 122.7, 70.0, 34.0, 31.2, 27.7, 19.0, 18.1. **HRMS** Calcd for  $\text{C}_{16}\text{H}_{26}\text{NO}_2$   $[\text{M}+\text{H}]^+$ : 264.1958; Found: 264.1960.

### isobutyl (4-(*tert*-butyl)-2-ethylphenyl)carbamate (3j)

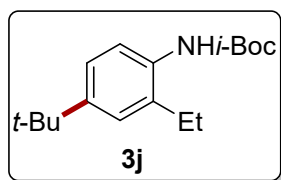

Pale yellow oil. Isolated yield: 42.1 mg, 76%.  $^1\text{H NMR}$  (400 MHz,  $\text{DMSO-}d_6$ )  $\delta$  8.69 (s, 1H, NH), 7.22-7.14 (m, 3H, ArH), 3.83 (d,  $J = 6.7$  Hz, 2H,  $\text{CH}_2$ ), 2.58 (q,  $J = 7.5$  Hz, 2H,  $\text{CH}_2$ ), 1.95-1.85 (m, 1H, CH), 1.27 (s, 9H,  $\text{C}(\text{CH}_3)_3$ ), 1.10 (t,  $J = 7.6$  Hz, 3H,  $\text{CH}_3$ ), 0.92 (d,  $J = 6.8$  Hz, 6H,  $\text{C}(\text{CH}_3)_2$ ).  $^{13}\text{C NMR}$  (100 MHz,  $\text{DMSO-}d_6$ )  $\delta$  155.0, 147.6, 137.6, 133.2, 125.7, 125.2, 122.7, 70.0, 34.0, 31.2, 27.7, 24.1, 19.0, 14.4. **HRMS** Calcd for  $\text{C}_{17}\text{H}_{28}\text{NO}_2$   $[\text{M}+\text{H}]^+$ : 278.2115; Found: 278.2110.

### isobutyl (4-(*tert*-butyl)-2-isopropylphenyl)carbamate (3k)

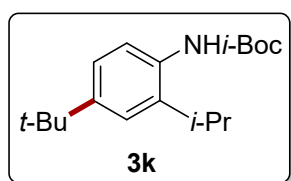

Pale yellow oil. Isolated yield: 48.3 mg, 83%.  $^1\text{H NMR}$  (400 MHz,  $\text{DMSO-}d_6$ )  $\delta$  8.71 (s, 1H, NH), 7.26 (d,  $J = 2.3$  Hz, 1H, ArH), 7.15 (dd,  $J = 8.3, 2.3$  Hz, 1H, ArH), 7.09 (d,  $J = 8.3$  Hz, 1H, ArH), 3.82 (d,  $J = 6.7$  Hz, 2H,  $\text{CH}_2$ ), 3.20-3.13 (m, 1H, CH), 1.94-1.84 (m, 1H, CH), 1.27 (s, 9H,  $\text{C}(\text{CH}_3)_3$ ), 1.13 (d,  $J = 6.9$  Hz, 6H,

C(CH<sub>3</sub>)<sub>2</sub>), 0.91 (d, *J* = 6.7 Hz, 6H, C(CH<sub>3</sub>)<sub>2</sub>). <sup>13</sup>C NMR (100 MHz, DMSO-*d*<sub>6</sub>) δ 155.4, 148.1, 142.8, 132.3, 126.6, 122.6, 121.9, 69.9, 34.2, 31.2, 27.7, 27.2, 23.2, 19.0. HRMS Calcd for C<sub>18</sub>H<sub>30</sub>NO<sub>2</sub> [M+H]<sup>+</sup>: 292.2271; Found: 292.2275.

### isobutyl (4-(*tert*-butyl)-3-fluorophenyl)carbamate (3l)

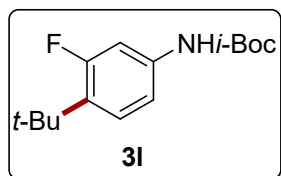

Pale yellow oil. Isolated yield: 24.0 mg, 45%. <sup>1</sup>H NMR (400 MHz, CDCl<sub>3</sub>) δ 7.26-7.14 (m, 2H, ArH), 6.95 (dd, *J* = 8.4, 1.7 Hz, 1H, ArH), 6.61 (s, 1H, NH), 3.95 (d, *J* = 6.7 Hz, 2H, CH<sub>2</sub>), 2.04-1.90 (m, 1H, CH), 1.35 (s, 9H, C(CH<sub>3</sub>)<sub>3</sub>), 0.96 (d, *J* = 6.7 Hz, 6H, C(CH<sub>3</sub>)<sub>2</sub>). <sup>13</sup>C NMR (100 MHz, CDCl<sub>3</sub>) δ 162.1 (d, *J* = 247.0 Hz), 153.7, 137.4 (d, *J* = 11.7 Hz), 132.1 (d, *J* = 12.0 Hz), 127.5 (d, *J* = 7.3 Hz), 113.6, 107.2 (d, *J* = 27.6 Hz), 71.6, 34.0, 30.1, 28.1, 19.2. <sup>19</sup>F NMR (377 MHz, CDCl<sub>3</sub>) δ -107.78. HRMS Calcd for C<sub>15</sub>H<sub>22</sub>FNO<sub>2</sub>Na [M+Na]<sup>+</sup>: 290.1527; Found: 290.1522.

### ethyl (4-(*tert*-butyl)phenyl)carbamate (3m)

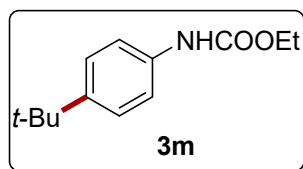

Pale yellow oil. Isolated yield: 41.1 mg, 93%. <sup>1</sup>H NMR (400 MHz, DMSO-*d*<sub>6</sub>) δ 9.46 (s, 1H, NH), 7.37 (d, *J* = 8.6 Hz, 2H, ArH), 7.27 (d, *J* = 8.8 Hz, 2H, ArH), 4.10 (q, *J* = 7.1 Hz, 2H, CH<sub>2</sub>), 1.27-1.21 (m, 12H, CH<sub>3</sub>, C(CH<sub>3</sub>)<sub>3</sub>). <sup>13</sup>C NMR (100 MHz, DMSO-*d*<sub>6</sub>) δ 153.6, 144.6, 136.6, 125.3, 118.0, 60.0, 33.9, 31.2, 14.6. HRMS Calcd for C<sub>13</sub>H<sub>19</sub>NO<sub>2</sub>Na [M+Na]<sup>+</sup>: 244.1308; Found: 244.1315.

### propyl (4-(*tert*-butyl)phenyl)carbamate (3n)

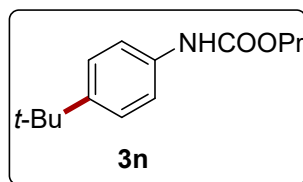

Pale yellow oil. Isolated yield: 42.3 mg, 90%. <sup>1</sup>H NMR (400 MHz, DMSO-*d*<sub>6</sub>) δ 9.49 (s, 1H, NH), 7.38 (d, *J* = 8.4 Hz, 2H, ArH), 7.27 (d, *J* = 8.7 Hz, 2H, ArH), 4.02 (t, *J* = 6.7 Hz, 2H, CH<sub>2</sub>), 1.67-1.58 (m, 2H, CH<sub>2</sub>), 1.24 (s, 9H, C(CH<sub>3</sub>)<sub>3</sub>), 0.93 (t, *J* = 7.4 Hz, 3H, CH<sub>3</sub>). <sup>13</sup>C NMR (100 MHz, DMSO-*d*<sub>6</sub>) δ 153.7, 144.5, 136.7, 125.3, 118.0, 65.5, 33.9, 31.2, 22.0, 10.3. HRMS Calcd for C<sub>14</sub>H<sub>21</sub>NO<sub>2</sub>Na [M+Na]<sup>+</sup>: 258.1465; Found: 258.1459

### butyl (4-(*tert*-butyl)phenyl)carbamate (3o)

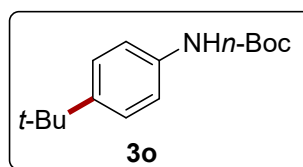

Pale yellow oil. Isolated yield: 46.3 mg, 93%. <sup>1</sup>H NMR (400 MHz, DMSO-*d*<sub>6</sub>) δ 9.47 (s, 1H, NH), 7.37 (d, *J* = 8.4 Hz, 2H, ArH), 7.27 (d, *J* = 8.8 Hz, 2H, ArH), 4.06 (t, *J* = 6.6 Hz, 2H, CH<sub>2</sub>), 1.63-1.56 (m, 2H, CH<sub>2</sub>), 1.42-1.27 (m, 2H, CH<sub>2</sub>), 1.24 (s, 9H, C(CH<sub>3</sub>)<sub>3</sub>), 0.91 (t, *J* = 7.4 Hz, 3H, CH<sub>3</sub>). <sup>13</sup>C NMR (100 MHz,

DMSO- $d_6$ )  $\delta$  153.7, 144.5, 136.6, 125.3, 118.0, 63.7, 33.9, 31.2, 30.7, 18.7, 13.6.  
**HRMS** Calcd for  $C_{15}H_{23}NO_2Na$   $[M+Na]^+$ : 272.1621; Found: 272.1615.

### allyl (4-(*tert*-butyl)phenyl)carbamate (**3p**)

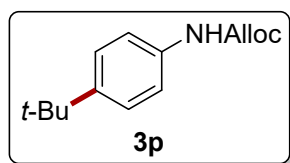

Pale yellow oil. Isolated yield: 34.5 mg, 74%.  $^1H$  NMR (400 MHz, DMSO- $d_6$ )  $\delta$  9.59 (s, 1H, NH), 7.37 (d,  $J$  = 8.4 Hz, 2H, ArH), 7.28 (d,  $J$  = 8.7 Hz, 2H, ArH), 6.02-5.93 (m, 1H, CH), 5.38-5.32 (m, 1H, CH), 5.26-5.20 (m, 1H, CH), 4.62-4.56 (m, 2H, CH<sub>2</sub>), 1.24 (s, 9H, C(CH<sub>3</sub>)<sub>3</sub>).  $^{13}C$  NMR (100 MHz, DMSO- $d_6$ )  $\delta$  153.3, 144.8, 136.5, 133.4, 125.4, 118.1, 117.5, 64.5, 33.9, 31.2. **HRMS** Calcd for  $C_{14}H_{19}NO_2Na$   $[M+Na]^+$ : 256.1308; Found: 256.1305.

### 2,2,2-trichloroethyl (4-(*tert*-butyl)phenyl)carbamate (**3q**)

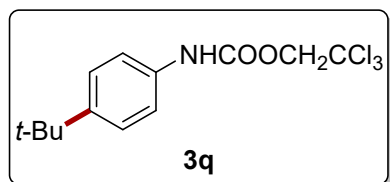

Pale yellow oil. Isolated yield: 56.2 mg, 87%.  $^1H$  NMR (400 MHz, DMSO- $d_6$ )  $\delta$  10.03 (s, 1H, NH), 7.43 (d,  $J$  = 8.4 Hz, 2H, ArH), 7.31 (d,  $J$  = 8.7 Hz, 2H, ArH), 4.92 (s, 2H, CH<sub>2</sub>), 1.25 (s, 9H, C(CH<sub>3</sub>)<sub>3</sub>).  $^{13}C$  NMR (100 MHz, DMSO- $d_6$ )  $\delta$  151.8, 145.4, 135.9, 125.4, 118.4, 96.1, 73.4, 33.9, 31.2. **HRMS** Calcd for  $C_{13}H_{16}Cl_3NO_2Na$   $[M+Na]^+$ : 346.0139; Found: 346.0133.

### 2-chloroethyl (4-(*tert*-butyl)phenyl)carbamate (**3r**)

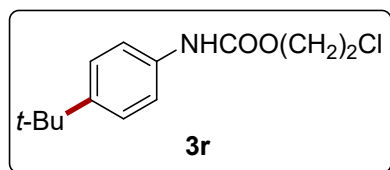

Pale yellow oil. Isolated yield: 42.8 mg, 84%.  $^1H$  NMR (400 MHz, DMSO- $d_6$ )  $\delta$  9.71 (s, 1H, NH), 7.40 (d,  $J$  = 8.4 Hz, 2H, ArH), 7.28 (d,  $J$  = 8.8 Hz, 2H, ArH), 4.36-4.30 (m, 2H, CH<sub>2</sub>), 3.89-3.83 (m, 2H, CH<sub>2</sub>), 1.24 (s, 9H, C(CH<sub>3</sub>)<sub>3</sub>).  $^{13}C$  NMR (100 MHz, DMSO- $d_6$ )  $\delta$  153.2, 144.8, 136.3, 125.3, 118.2, 64.2, 43.1, 33.9, 31.2. **HRMS** Calcd for  $C_{13}H_{18}ClNO_2Na$   $[M+Na]^+$ : 278.0918; Found: 278.0920.

### phenyl (4-(*tert*-butyl)phenyl)carbamate (**3s**)

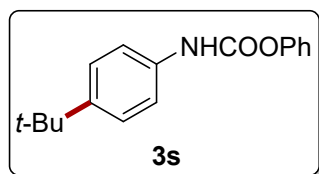

Pale yellow oil. Isolated yield: 45.7 mg, 85%.  $^1H$  NMR (400 MHz, DMSO- $d_6$ )  $\delta$  10.16 (s, 1H, NH), 7.50 (d,  $J$  = 8.4 Hz, 2H, ArH), 7.45-7.39 (m, 2H, ArH), 7.34 (d,  $J$  = 8.8 Hz, 2H, ArH), 7.26-7.21 (m, 3H, ArH), 1.27 (s, 9H, C(CH<sub>3</sub>)<sub>3</sub>).

C(CH<sub>3</sub>)<sub>3</sub>). <sup>13</sup>C NMR (100 MHz, DMSO-*d*<sub>6</sub>) δ 151.8, 150.7, 145.3, 136.1, 129.4, 125.5, 125.3, 121.9, 118.3, 33.9, 31.2. **HRMS** Calcd for C<sub>17</sub>H<sub>19</sub>NO<sub>2</sub>Na [M+Na]<sup>+</sup>: 292.1308; Found: 292.1314.

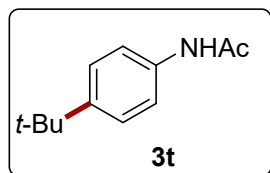

#### **N-(4-(tert-butyl)phenyl)acetamide (3t)**

White solid, m.p. 171-173 °C. Isolated yield: 7.6 mg, 20%. <sup>1</sup>H NMR (400 MHz, CDCl<sub>3</sub>) δ 7.41 (d, *J* = 8.7 Hz, 2H, ArH), 7.37 (s, 1H, NH), 7.32 (d, *J* = 8.7 Hz, 2H, ArH), 2.15 (s, 3H, CH<sub>3</sub>), 1.30 (s, 9H, C(CH<sub>3</sub>)<sub>3</sub>). <sup>13</sup>C NMR (100 MHz, CDCl<sub>3</sub>) δ 168.5, 147.4, 135.4, 125.9, 120.0, 34.5, 31.5, 24.6. **HRMS** Calcd for C<sub>12</sub>H<sub>17</sub>NONa [M+Na]<sup>+</sup>: 214.1202; Found: 214.1205.

#### **4-(tert-butyl)phenol (5a)**

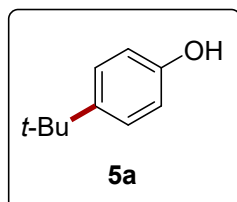

White solid, m.p. 97-98 °C (文献值<sup>[9]</sup>: 94-95 °C). Isolated yield: 28.8 mg, 96%. <sup>1</sup>H NMR (400 MHz, CDCl<sub>3</sub>) δ 7.34 (d, *J* = 8.8 Hz, 2H, ArH), 6.89 (d, *J* = 8.7 Hz, 2H, ArH), 6.19 (s, 1H, OH), 1.38 (s, 9H, C(CH<sub>3</sub>)<sub>3</sub>). <sup>13</sup>C NMR (100 MHz, CDCl<sub>3</sub>) δ 152.9, 143.8, 126.6, 115.0, 34.2, 31.6. **HRMS** Calcd for C<sub>10</sub>H<sub>14</sub>ONa [M+Na]<sup>+</sup>: 173.0937; Found: 173.0934.

#### **4-(tert-pentyl)phenol (5b)**

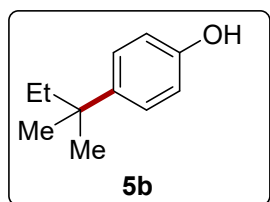

White solid, m.p. 94-95 °C (文献值<sup>[10]</sup>: 94-96 °C). Isolated yield: 28.9 mg, 88%. <sup>1</sup>H NMR (400 MHz, CDCl<sub>3</sub>) δ 7.20 (d, *J* = 8.8 Hz, 2H, ArH), 6.79 (d, *J* = 8.7 Hz, 2H, ArH), 5.22 (s, 1H, OH), 1.62 (q, *J* = 7.4 Hz, 2H, CH<sub>2</sub>), 1.27 (s, 6H, C(CH<sub>3</sub>)<sub>2</sub>), 0.69 (t, *J* = 7.4 Hz, 3H, CH<sub>3</sub>). <sup>13</sup>C NMR (100 MHz, CDCl<sub>3</sub>) δ 153.1, 141.9, 127.2, 114.9, 37.4, 37.1, 28.7, 9.2. **HRMS** Calcd for C<sub>11</sub>H<sub>16</sub>ONa [M+Na]<sup>+</sup>: 187.1093; Found: 187.1092.

#### **4-(1-methylcyclohexyl)phenol (5c)**

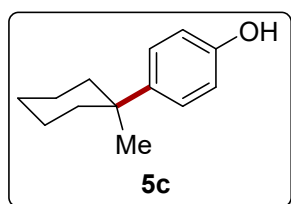

White solid, m.p. 96-97 °C. Isolated yield: 34.2 mg, 90%. <sup>1</sup>H NMR (400 MHz, CDCl<sub>3</sub>) δ 7.23 (d, *J* = 8.4 Hz, 2H, ArH), 6.78 (d, *J* = 8.3 Hz, 2H, ArH), 4.99 (s, 1H, OH), 1.94 (dd, *J* = 13.7, 7.6 Hz, 2H, CH<sub>2</sub>), 1.57-1.39 (m, 8H, 4 × CH<sub>2</sub>), 1.15 (s, 3H, CH<sub>3</sub>). <sup>13</sup>C NMR (100 MHz, CDCl<sub>3</sub>) δ 153.1, 142.5,



127.2, 115.1, 38.2, 37.4, 30.8, 26.5, 22.8. **HRMS** Calcd for  $C_{13}H_{18}ONa$   $[M+Na]^+$ : 213.1250; Found: 213.1248.

#### 4-(1-methylcyclopentyl)phenol (**5d**)

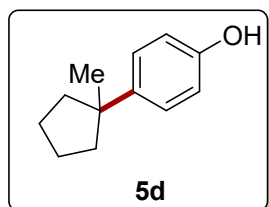

White solid, m.p. 90-91 °C. Isolated yield: 32.4 mg, 92%.  **$^1H$  NMR** (400 MHz,  $CDCl_3$ )  $\delta$  7.21 (d,  $J = 8.7$  Hz, 2H, ArH), 6.78 (d,  $J = 8.6$  Hz, 2H, ArH), 5.02 (s, 1H, OH), 1.91-1.71 (m, 8H,  $4 \times CH_2$ ), 1.23 (s, 3H,  $CH_3$ ).  **$^{13}C$  NMR** (100 MHz,  $CDCl_3$ )  $\delta$  153.1, 143.9, 127.3, 114.9, 46.6, 40.0, 29.7, 23.8. **HRMS** Calcd for  $C_{12}H_{16}ONa$   $[M+Na]^+$ : 199.1093; Found: 199.1098.

#### 4-(2,6-dimethylheptan-2-yl)phenol (**5e**)

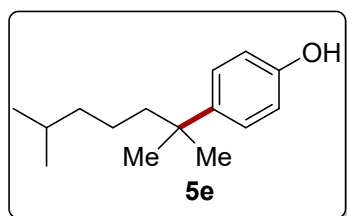

Colorless oil. Isolated yield: 37.8 mg, 86%.  **$^1H$  NMR** (400 MHz,  $CDCl_3$ )  $\delta$  7.20 (d,  $J = 8.7$  Hz, 2H, ArH), 6.79 (d,  $J = 8.8$  Hz, 2H, ArH), 5.16 (s, 1H, OH), 1.56-1.43 (m, 3H,  $CH_3$ ), 1.27 (s, 6H,  $C(CH_3)_2$ ), 1.12-1.03 (m, 4H,  $2 \times CH_2$ ), 0.81 (d,  $J = 6.6$  Hz, 6H,  $C(CH_3)_2$ ).  **$^{13}C$  NMR** (100 MHz,  $CDCl_3$ )  $\delta$  153.1, 142.3, 127.1, 114.9, 45.0, 39.8, 37.2, 29.3, 27.9, 22.8, 22.5. **HRMS** Calcd for  $C_{15}H_{24}ONa$   $[M+Na]^+$ : 243.1719; Found: 243.1715.

#### 4-(2-methylpentan-2-yl)phenol (**5f**)

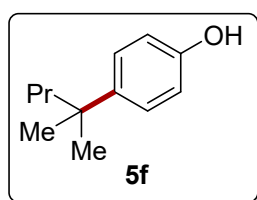

Colorless oil. Isolated yield: 29.9 mg, 84%.  **$^1H$  NMR** (400 MHz,  $CDCl_3$ )  $\delta$  7.19 (d,  $J = 8.7$  Hz, 2H, ArH), 6.77 (d,  $J = 8.7$  Hz, 2H, ArH), 4.77 (s, 1H, OH), 1.57-1.49 (m, 2H,  $CH_2$ ), 1.26 (s, 6H,  $C(CH_3)_2$ ), 1.12-1.02 (m, 2H,  $CH_2$ ), 0.81 (t,  $J = 7.3$  Hz, 3H,  $CH_3$ ).  **$^{13}C$  NMR** (100 MHz,  $CDCl_3$ )  $\delta$  153.2, 142.3, 127.1, 114.8, 47.4, 37.3, 29.2, 18.1, 14.9. **HRMS** Calcd for  $C_{12}H_{18}ONa$   $[M+Na]^+$ : 201.1250; Found: 201.1252.

#### 4-(1-ethylcyclopentyl)phenol (**5g**)

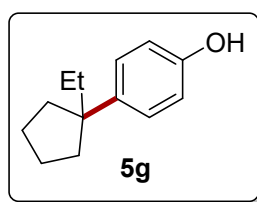

White solid, m.p. 96-97 °C. Isolated yield: 32.3 mg, 85%.  **$^1H$  NMR** (400 MHz,  $CDCl_3$ )  $\delta$  7.13 (d,  $J = 8.7$  Hz, 2H, ArH), 6.76 (d,  $J = 8.7$  Hz, 2H, ArH), 4.91 (s, 1H, OH), 1.89-1.60 (m, 8H,  $4 \times CH_2$ ), 1.56 (q,  $J = 7.4$  Hz, 2H,  $CH_2$ ), 0.60 (t,  $J = 7.4$  Hz, 3H,  $CH_3$ ).  **$^{13}C$  NMR** (100 MHz,  $CDCl_3$ )  $\delta$  153.1, 141.2, 128.2,

114.7, 50.9, 37.5, 34.4, 23.4, 9.6. **HRMS** Calcd for  $C_{13}H_{18}ONa$   $[M+Na]^+$ : 213.1250; Found: 213.1243.

#### 4-(3-methylpentan-3-yl)phenol (**5h**)

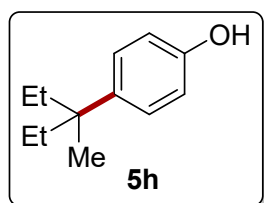

White solid, m.p. 79-80 °C (文献值<sup>[11]</sup>: 77-78 °C). Isolated yield: 29.2 mg, 82%. **<sup>1</sup>H NMR** (400 MHz,  $CDCl_3$ )  $\delta$  7.15 (d,  $J = 8.7$  Hz, 2H, ArH), 6.80 (d,  $J = 8.7$  Hz, 2H, ArH), 5.45 (s, 1H, OH), 1.74-1.65 (m, 2H,  $CH_2$ ), 1.58-1.49 (m, 2H,  $CH_2$ ), 1.22 (s, 3H,  $CH_3$ ), 0.68 (t,  $J = 7.4$  Hz, 6H,  $C(CH_3)_2$ ). **<sup>13</sup>C NMR** (100 MHz,  $CDCl_3$ )  $\delta$  153.0, 140.0, 127.9, 114.8, 40.7, 35.4, 23.1, 8.8. **HRMS** Calcd for  $C_{12}H_{18}ONa$   $[M+Na]^+$ : 201.1250; Found: 201.1256.

#### 2-(sec-butyl)-4-(tert-butyl)phenol (**5i**)

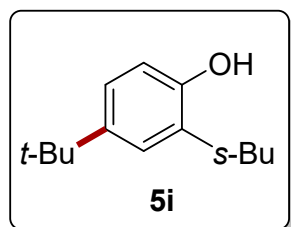

Colorless oil. Isolated yield: 26.8 mg, 65%. **<sup>1</sup>H NMR** (400 MHz,  $CDCl_3$ )  $\delta$  7.07 (d,  $J = 8.1$  Hz, 1H, ArH), 6.93 (dd,  $J = 8.1, 1.9$  Hz, 1H, ArH), 6.78 (d,  $J = 1.9$  Hz, 1H, ArH), 4.60 (s, 1H, OH), 2.94-2.84 (m, 1H, CH), 1.71-1.52 (m, 2H,  $CH_2$ ), 1.29 (s, 9H,  $C(CH_3)_3$ ), 1.23 (d,  $J = 6.9$  Hz, 3H,  $CH_3$ ), 0.88 (t,  $J = 7.4$  Hz, 3H,  $CH_3$ ). **<sup>13</sup>C NMR** (100 MHz,  $CDCl_3$ )  $\delta$  152.7, 150.2, 130.1, 126.7, 118.0, 112.7, 34.4, 33.9, 31.5, 30.0, 20.5, 12.4. **HRMS** Calcd for  $C_{14}H_{22}ONa$   $[M+Na]^+$ : 229.1563; Found: 229.1568.

#### 4-(tert-butyl)-2-chlorophenol (**5j**)

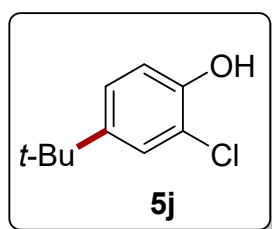

Colorless oil. Isolated yield: 31.3 mg, 85%. **<sup>1</sup>H NMR** (400 MHz,  $CDCl_3$ )  $\delta$  7.31 (d,  $J = 2.3$  Hz, 1H, ArH), 7.20 (dd,  $J = 8.5, 2.3$  Hz, 1H, ArH), 6.95 (d,  $J = 8.5$  Hz, 1H, ArH), 5.39 (s, 1H, OH), 1.29 (s, 9H,  $C(CH_3)_3$ ). **<sup>13</sup>C NMR** (100 MHz,  $CDCl_3$ )  $\delta$  149.1, 144.9, 126.0, 125.6, 119.4, 115.8, 34.4, 31.5. **HRMS** Calcd for  $C_{10}H_{11}ClONa$   $[M+Na]^+$ : 207.0547; Found: 207.0545.

#### 2-bromo-4-(tert-butyl)phenol (**5k**)

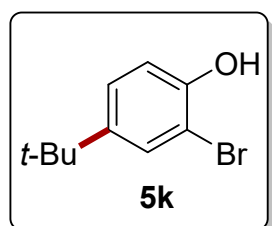

Colorless oil. Isolated yield: 34.2 mg, 75%. **<sup>1</sup>H NMR** (400 MHz,  $CDCl_3$ )  $\delta$  7.45 (d,  $J = 2.3$  Hz, 1H, ArH), 7.24 (dd,  $J = 8.7, 2.1$  Hz, 1H, ArH), 6.95 (d,  $J = 8.5$  Hz, 1H, ArH), 5.42 (s, 1H, OH), 1.29 (s, 9H,  $C(CH_3)_3$ ). **<sup>13</sup>C NMR** (100 MHz,  $CDCl_3$ )

$\delta$  150.0, 145.3, 128.9, 126.4, 115.7, 110.0, 34.4, 31.5. **HRMS** Calcd for  $C_{10}H_{13}BrONa$   $[M+Na]^+$ : 251.0042; Found: 251.0048.

#### 4-(tert-butyl)-2,6-dimethoxyphenol (**5l**)

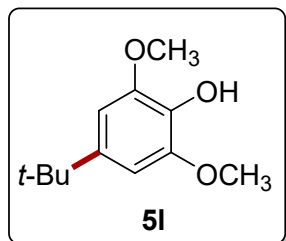

Colorless oil. Isolated yield: 37.8 mg, 90%.  **$^1H$  NMR** (400 MHz,  $CDCl_3$ )  $\delta$  6.61 (s, 2H, ArH), 5.38 (s, 1H, OH), 3.90 (s, 6H,  $OCH_3$ ), 1.31 (s, 9H,  $C(CH_3)_3$ ).  **$^{13}C$  NMR** (100 MHz,  $CDCl_3$ )  $\delta$  146.7, 142.6, 132.8, 102.6, 56.5, 34.8, 31.7. **HRMS** Calcd for  $C_{12}H_{19}O_3$   $[M+H]^+$ : 211.1329; Found: 211.1333.

#### 1-(tert-butyl)-4-methoxybenzene (**5m**)

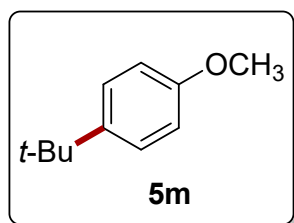

Colorless oil. Isolated yield: 31.2 mg, 95%.  **$^1H$  NMR** (400 MHz,  $CDCl_3$ )  $\delta$  7.32 (d,  $J = 8.9$  Hz, 1H, ArH), 6.86 (d,  $J = 8.9$  Hz, 1H, ArH), 3.80 (s, 3H,  $OCH_3$ ), 1.32 (s, 9H,  $C(CH_3)_3$ ).  **$^{13}C$  NMR** (100 MHz,  $CDCl_3$ )  $\delta$  157.4, 143.5, 126.4, 113.5, 55.4, 34.2, 31.7. **HRMS** Calcd for  $C_{11}H_{17}O$   $[M+H]^+$ :

165.1274; Found: 165.1275.

#### 4-(tert-butyl)-2-fluoro-1-methoxybenzene (**5n**)

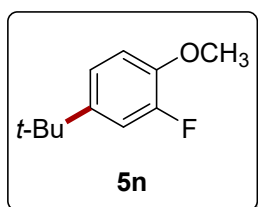

Yellow oil. Isolated yield: 33.5 mg, 92%.  **$^1H$  NMR** (400 MHz,  $CDCl_3$ )  $\delta$  7.11 (dd,  $J = 13.6, 2.3$  Hz, 1H, ArH), 7.07 (dd,  $J = 7.6, 1.5$  Hz, 1H, ArH), 6.89 (t,  $J = 8.8$  Hz, 1H, ArH), 3.87 (s, 3H,  $OCH_3$ ), 1.29 (s, 9H,  $C(CH_3)_3$ ).  **$^{13}C$  NMR** (100 MHz,  $CDCl_3$ )  $\delta$  152.2 (d,  $J = 243.9$  Hz), 145.3 (d,  $J = 10.9$  Hz), 144.8 (d,  $J = 5.1$

Hz), 120.7 (d,  $J = 3.3$  Hz), 113.6 (d,  $J = 18.4$  Hz), 113.1 (d,  $J = 2.1$  Hz), 56.5, 34.3 (d,  $J = 1.0$  Hz), 31.5.  **$^{19}F$  NMR** (377 MHz,  $CDCl_3$ )  $\delta$  -135.64. **HRMS** Calcd for  $C_{11}H_{15}FONa$   $[M+Na]^+$ : 205.0999; Found: 205.1005.

#### 4-(tert-butyl)-2-chloro-1-methoxybenzene (**5o**)

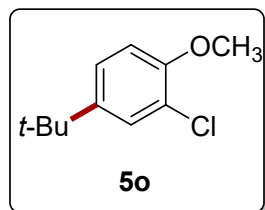

Yellow oil. Isolated yield: 34.8 mg, 88%.  **$^1H$  NMR** (400 MHz,  $CDCl_3$ )  $\delta$  7.37 (d,  $J = 2.4$  Hz, 1H, ArH), 7.22 (dd,  $J = 8.6, 2.4$  Hz, 1H, ArH), 6.86 (d,  $J = 8.6$  Hz, 1H, ArH), 3.88 (s, 3H,  $OCH_3$ ), 1.29 (s, 9H,  $C(CH_3)_3$ ).  **$^{13}C$  NMR** (100 MHz,  $CDCl_3$ )  $\delta$  152.8, 144.7, 127.6, 124.6, 122.0, 111.9, 56.3, 34.3, 31.5.

**HRMS** Calcd for  $C_{11}H_{15}ClONa$   $[M+Na]^+$ : 221.0704; Found: 221.0704.

### isopropyl (4-(*tert*-butyl)phenyl)carbamate (6)

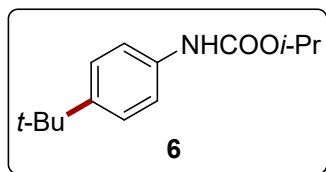

Pale yellow oil. Isolated yield: 39.0 mg, 83%.  $^1\text{H NMR}$  (400 MHz,  $\text{DMSO-}d_6$ )  $\delta$  9.40 (s, 1H, NH), 7.37 (d,  $J = 8.6$  Hz, 2H, ArH), 7.26 (d,  $J = 8.8$  Hz, 2H, ArH), 4.92-4.83 (m, 1H, CH), 1.27-1.21 (m, 15H,  $\text{C}(\text{CH}_3)_2$ ,  $\text{C}(\text{CH}_3)_3$ ).  $^{13}\text{C NMR}$  (100 MHz,  $\text{DMSO-}d_6$ )  $\delta$  153.2, 144.5, 136.7, 125.3, 118.0, 67.2, 33.9, 31.2, 22.0. **HRMS** Calcd for  $\text{C}_{14}\text{H}_{21}\text{NO}_2\text{Na}$   $[\text{M}+\text{Na}]^+$ : 258.1465; Found: 258.1463.

### methyl 5-(*tert*-butyl)-2-hydroxybenzoate (7)

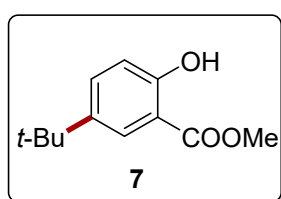

Colorless oil. Isolated yield: 31.2 mg, 75%.  $^1\text{H NMR}$  (400 MHz,  $\text{CDCl}_3$ )  $\delta$  10.60 (s, 1H, OH), 7.82 (d,  $J = 2.6$  Hz, 1H, ArH), 7.51 (dd,  $J = 8.8, 2.6$  Hz, 1H, ArH), 6.93 (d,  $J = 8.7$  Hz, 1H, ArH), 3.95 (s, 3H,  $\text{CH}_3$ ), 1.30 (s, 9H,  $\text{C}(\text{CH}_3)_3$ ).  $^{13}\text{C NMR}$  (100 MHz,  $\text{CDCl}_3$ )  $\delta$  170.9, 159.6, 142.0, 133.4, 126.0, 117.3, 111.7, 52.3, 34.2, 31.5. **HRMS** Calcd for  $\text{C}_{12}\text{H}_{17}\text{O}_3$   $[\text{M}+\text{H}]^+$ : 209.1172; Found: 209.1179.

### ethyl 5-(*tert*-butyl)-2-hydroxybenzoate (8)

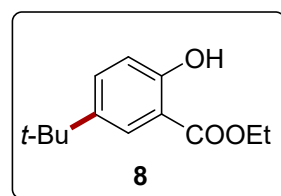

Colorless oil. Isolated yield: 31.1 mg, 70%.  $^1\text{H NMR}$  (400 MHz,  $\text{CDCl}_3$ )  $\delta$  10.70 (s, 1H, OH), 7.82 (d,  $J = 2.5$  Hz, 1H, ArH), 7.51 (dd,  $J = 8.7, 2.5$  Hz, 1H, ArH), 6.92 (d,  $J = 8.7$  Hz, 1H, ArH), 4.42 (q,  $J = 7.1$  Hz, 2H,  $\text{CH}_2$ ), 1.43 (t,  $J = 7.1$  Hz, 3H,  $\text{CH}_3$ ), 1.31 (s, 9H,  $\text{C}(\text{CH}_3)_3$ ).  $^{13}\text{C NMR}$  (100 MHz,  $\text{CDCl}_3$ )  $\delta$  170.5, 159.7, 141.9, 133.3, 125.9, 117.3, 111.9, 61.5, 34.2, 31.5, 14.4. **HRMS** Calcd for  $\text{C}_{13}\text{H}_{18}\text{O}_3\text{Na}$   $[\text{M}+\text{Na}]^+$ : 245.1148; Found: 245.1155.

## 8. References

- [1] Y. Han, G. Li, L. Liu, C. Dai, D.-Q. Shi and Y. Zhao, The protecting group enabled para-selective C-H benzylation of anilides via iron(ii) catalysis: a convenient approach for the synthesis of triarylmethanes, *Org. Chem. Front.*, 2020, **7**, 1823-1827.
- [2] V. K. Sharma, K.-C. Lee, E. Venkateswararao, C. Joo, M.-S. Kim, N. Sharma and S.-H. Jung, Structure-activity relationship study of arylsulfonylimidazolidinones as anticancer agents, *Bio. Med. Chem. Lett.*, 2011, **21**, 6829-6832.

- [3] S.-N. Wang, G.-Y. Zhang, A. Shoberu and J.-P. Zou, Copper-Catalyzed Coupling of Amines with Carbazates: An Approach to Carbamates, *J. Org. Chem.*, 2021, **86**, 9067-9075.
- [4] A. R. Sardarian, I. Dindarloo Inaloo and M. Zangiabadi, An Fe<sub>3</sub>O<sub>4</sub>@SiO<sub>2</sub>/Schiff base/Cu(II) complex as an efficient recyclable magnetic nanocatalyst for selective mono N-arylation of primary O-alkyl thiocarbamates and primary O-alkyl carbamates with aryl halides and arylboronic acids, *New J. Chem.*, 2019, **43**, 8557-8565.
- [5] S. Asano, K. Itto-Nakama and H. Arimoto, Carbamate as an accelerating group in intermolecular Pauson-Khand reaction, *Tetrahedron Lett.*, 2020, **61**, 151974.
- [6] Y. Zhang, X. Ge, H. Lu and G. Li, Catalytic Decarboxylative C-N Formation to Generate Alkyl, Alkenyl, and Aryl Amines, *Angew. Chem. Int. Ed.*, 2021, **60**, 1845-1852.
- [7] M.-E. Liosi, S. G. Krimmer, A. S. Newton, T. K. Dawson, D. E. Puleo, K. J. Cutrona, Y. Suzuki, J. Schlessinger and W. L. Jorgensen, Selective Janus Kinase 2 (JAK2) Pseudokinase Ligands with a Diaminotriazole Core, *J. Med. Chem.*, 2020, **63**, 5324-5340.
- [8] G. Lu, Y. Ren, B. Dong, B. Zhou, J. Ren, Y. Ke and B.-B. Zeng, A practical method for preparation of phenols from arylboronic acids catalyzed by iodopovidone in aqueous medium, *Tetrahedron Lett.*, 2019, **60**, 150859.
- [9] T. Imanishi, Y. Fujiwara, Y. Sawama, Y. Monguchi and H. Sajiki, Platinum on Carbon-Catalyzed Precise Reduction Control of Trichloromethyl to Geminal-Dichloromethyl Groups, *Adv. Synth. Catal.*, 2012, **354**, 771-776.
- [10] I. Fleischer, A. Berkefeld, P. M. Kathe, Nickel Hydride Catalyzed Cleavage of Allyl Ethers Induced by Isomerization, *Synlett.*, 2021, **32**, 1629-1632.
- [11] R. C. Huston and T. Y. Hsieh, Condensation of Aliphatic Alcohols with Aromatic Compounds in the Presence of Aluminum Chloride, *J. Am. Chem. Soc.*, 1936, **58**, 439-441.

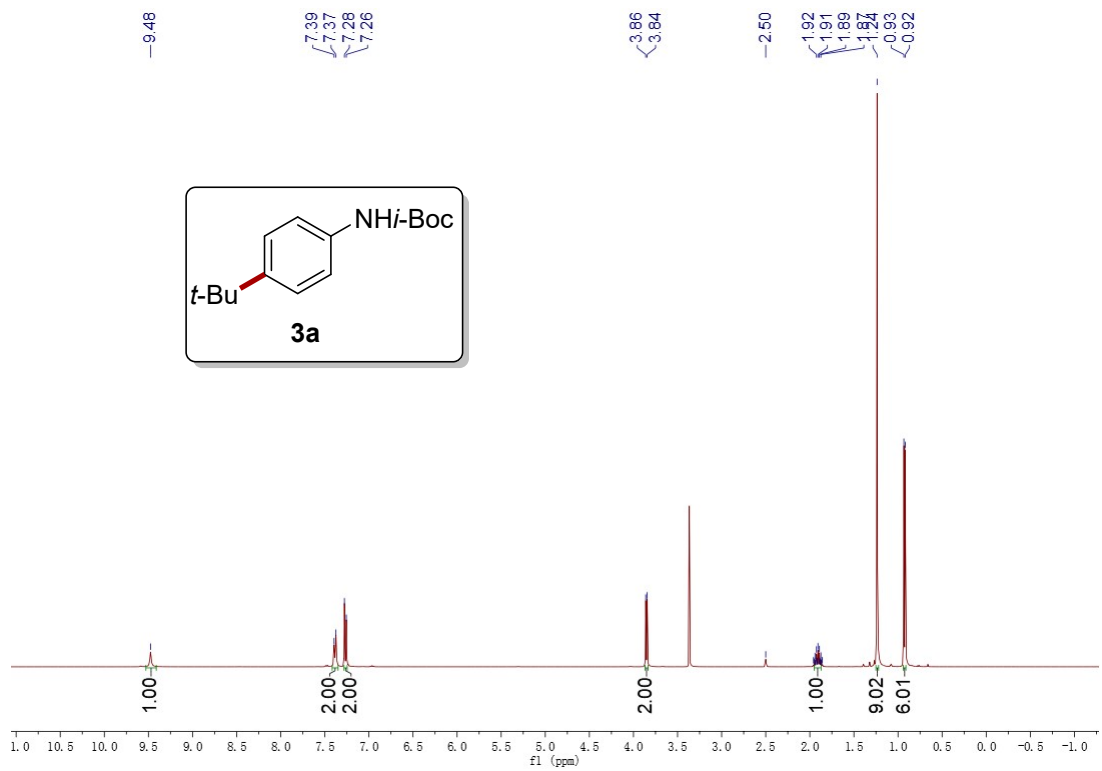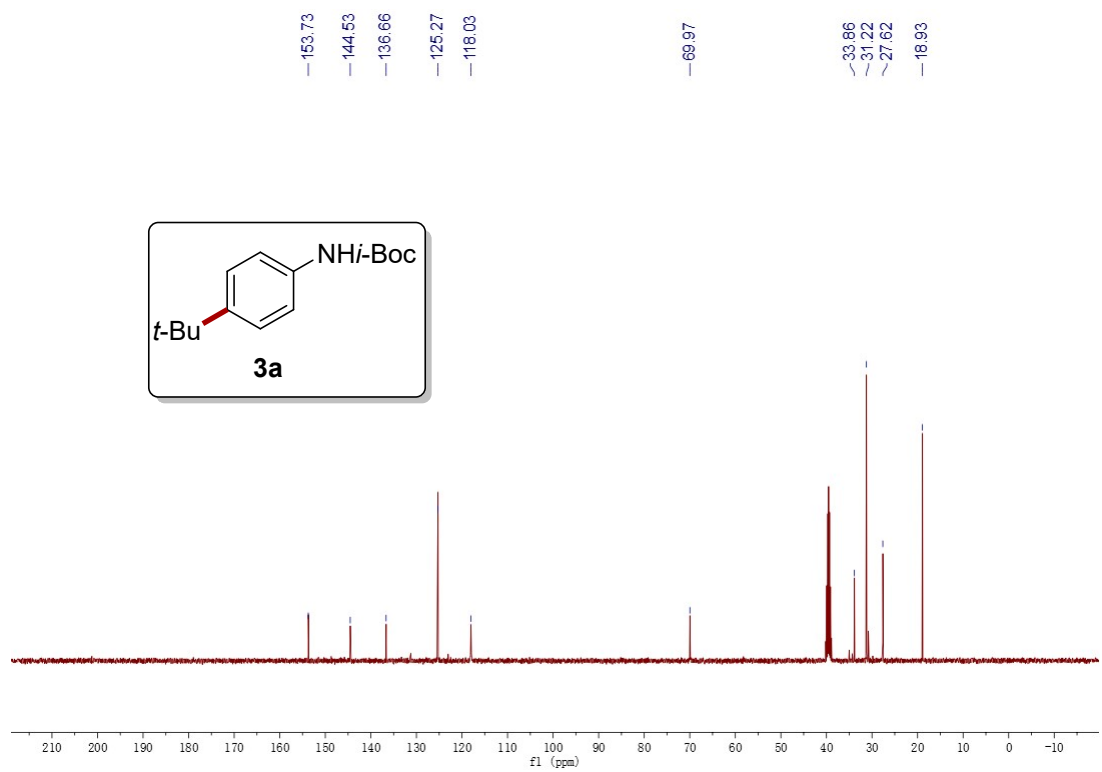

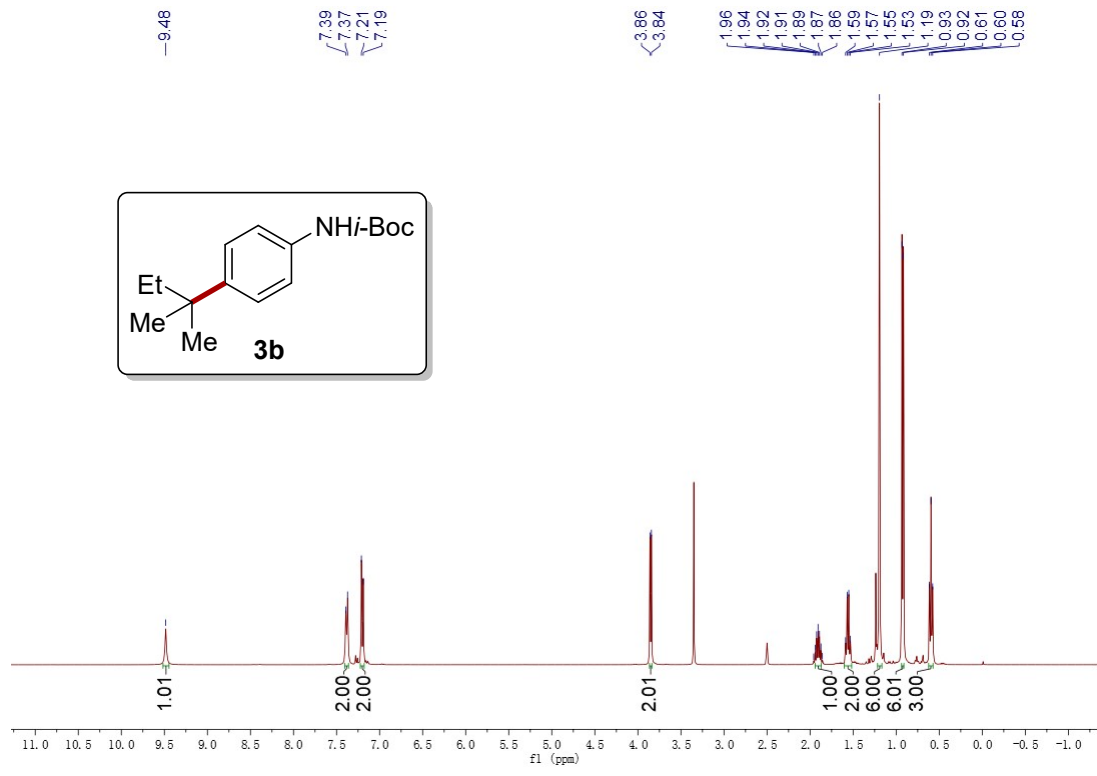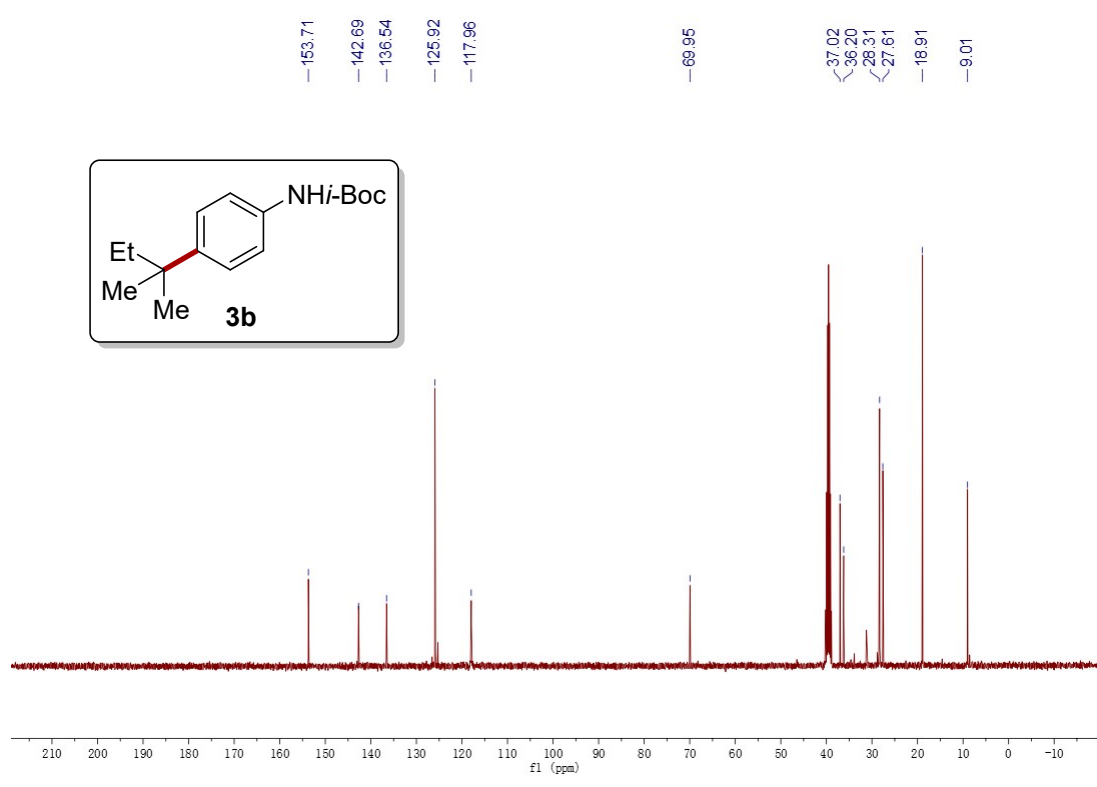

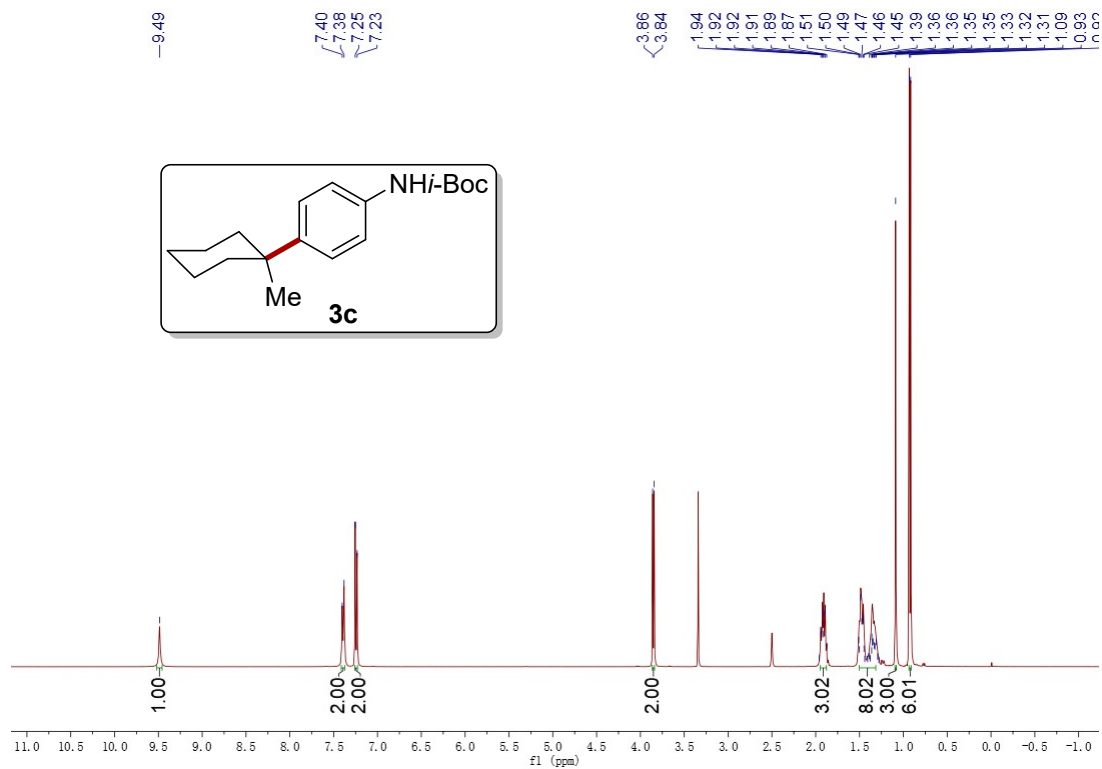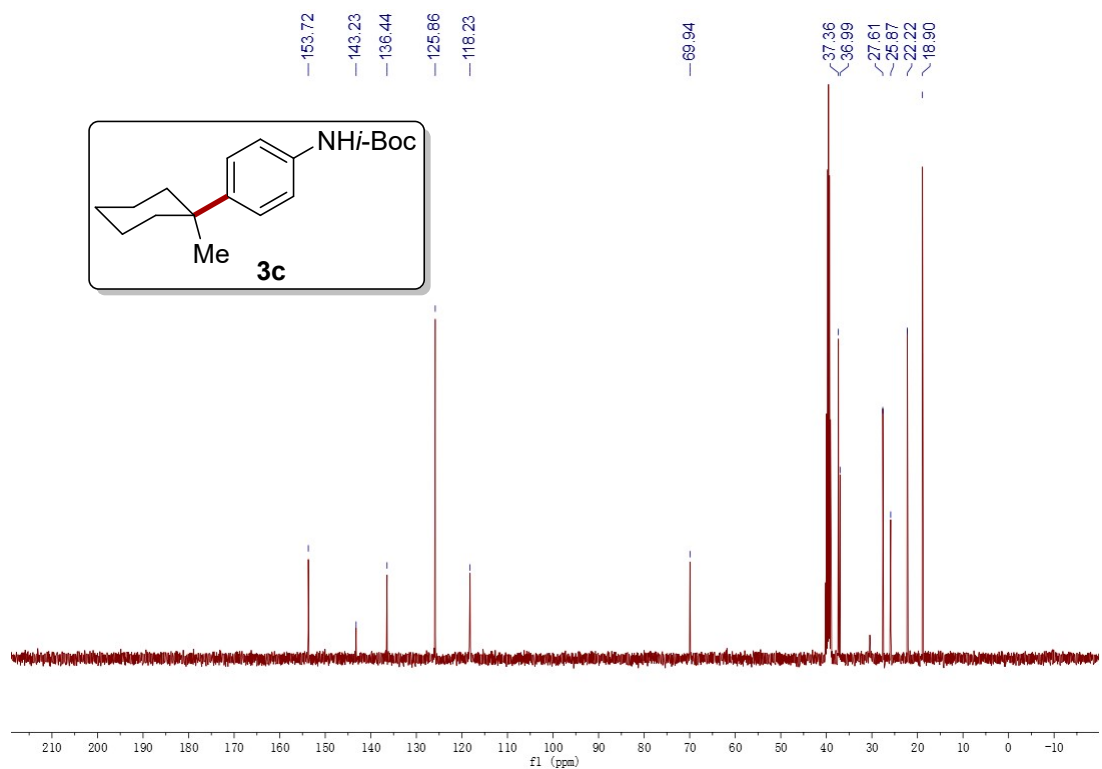



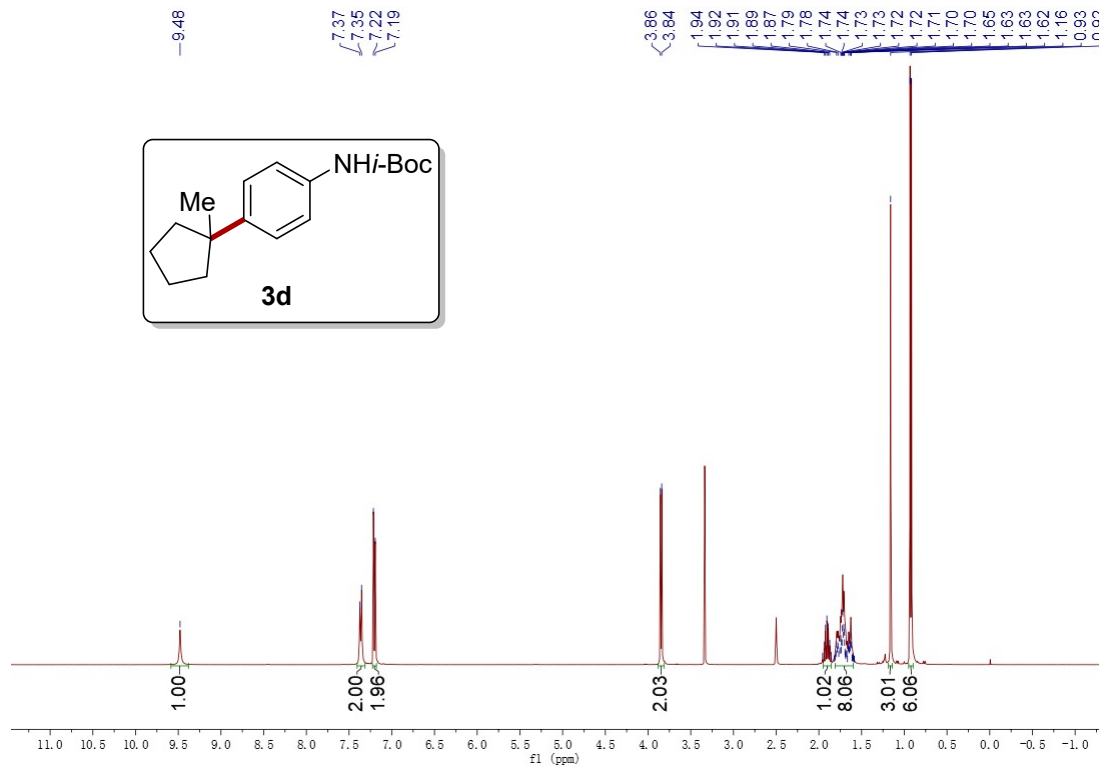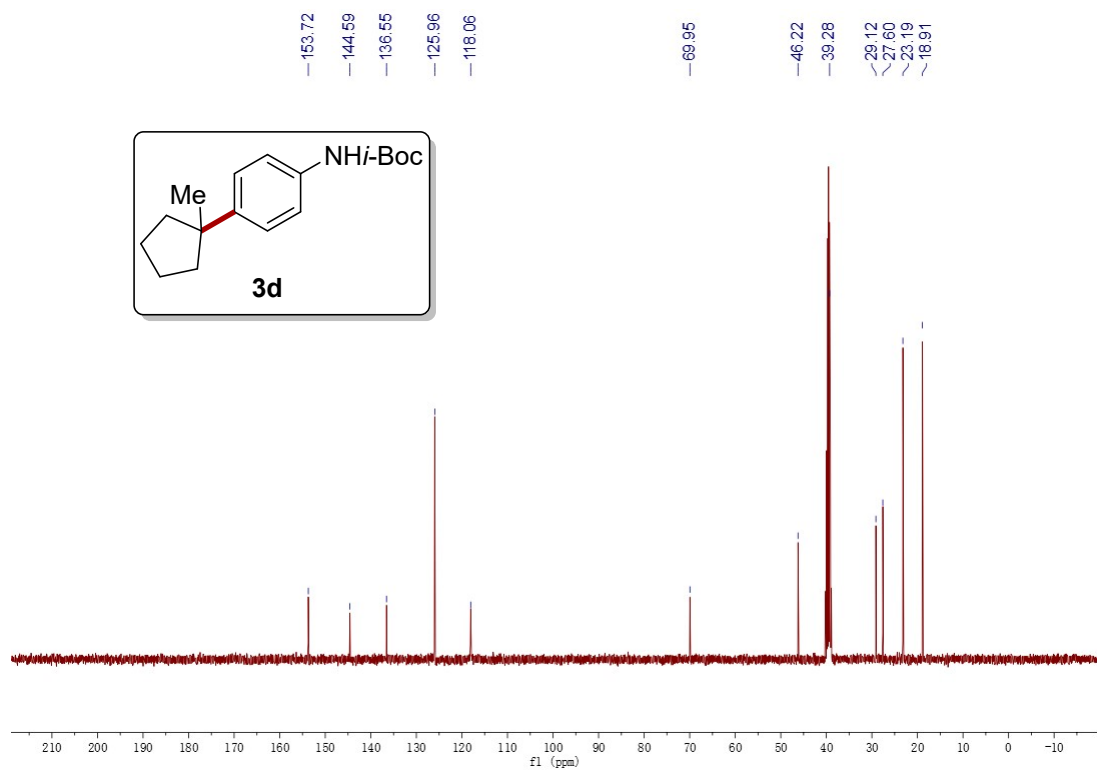

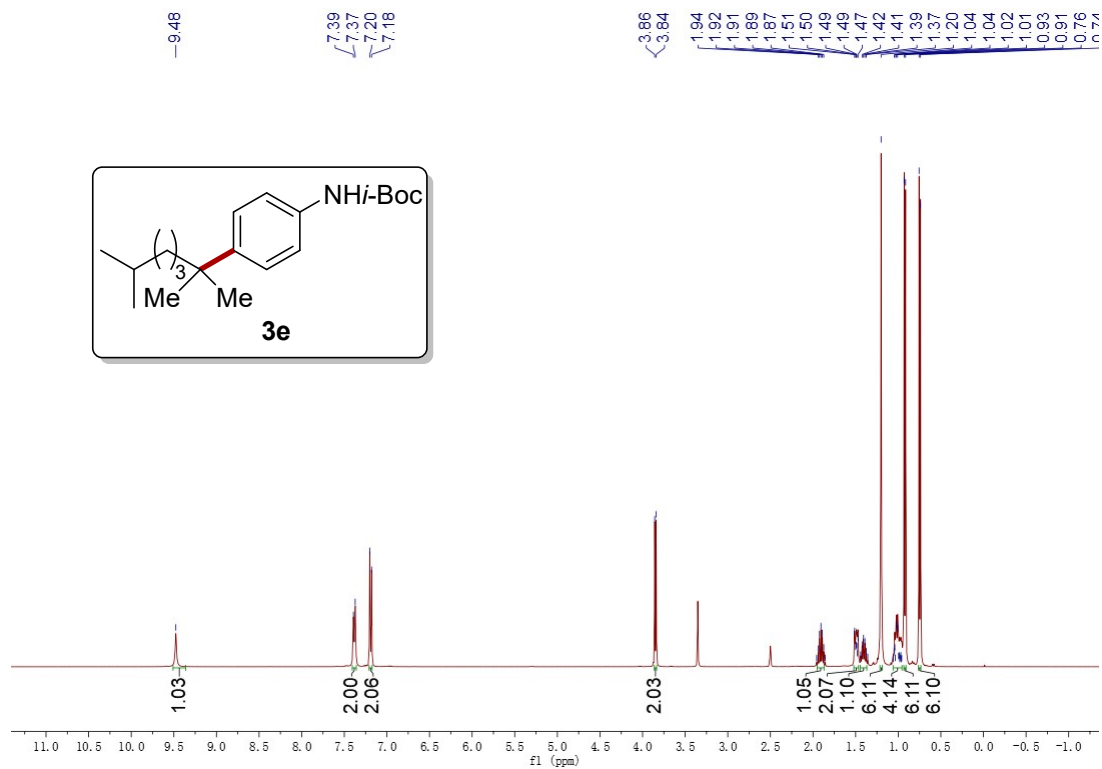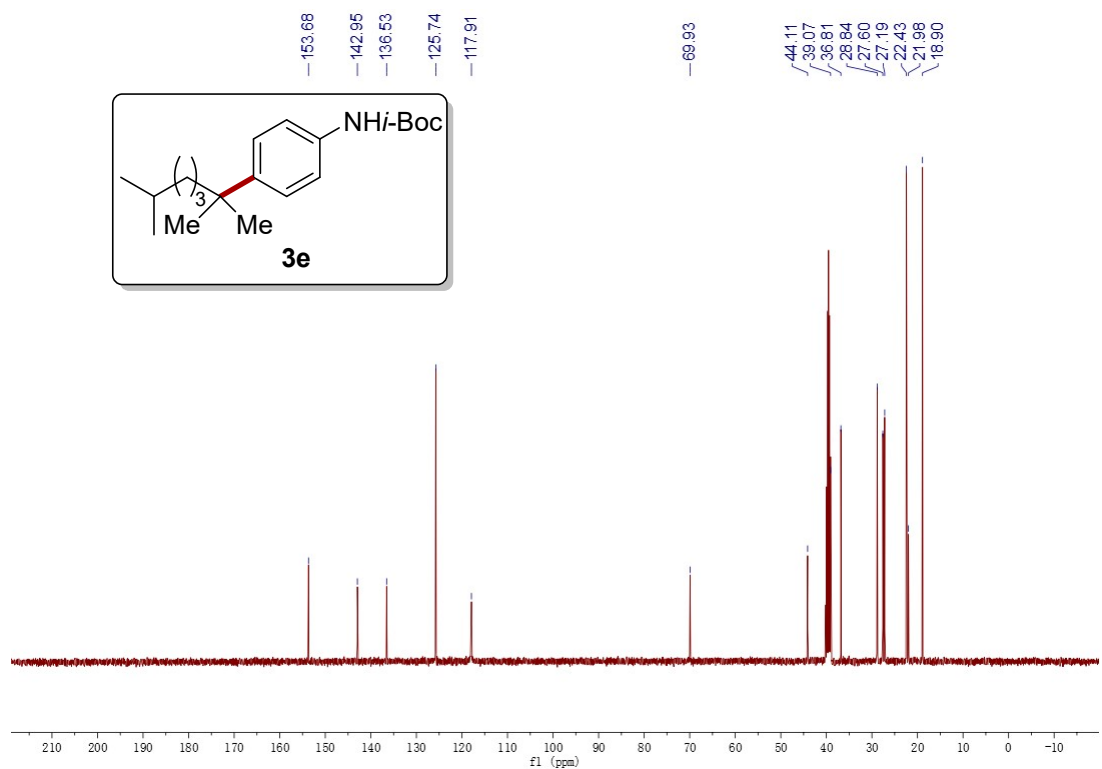

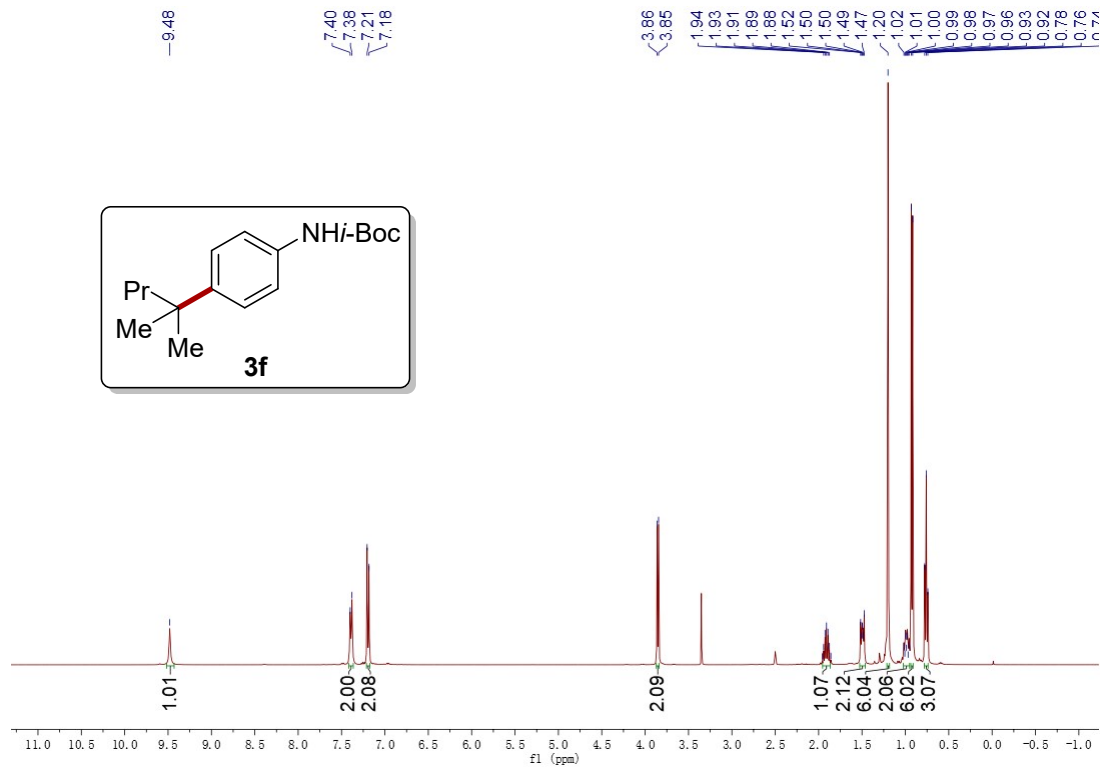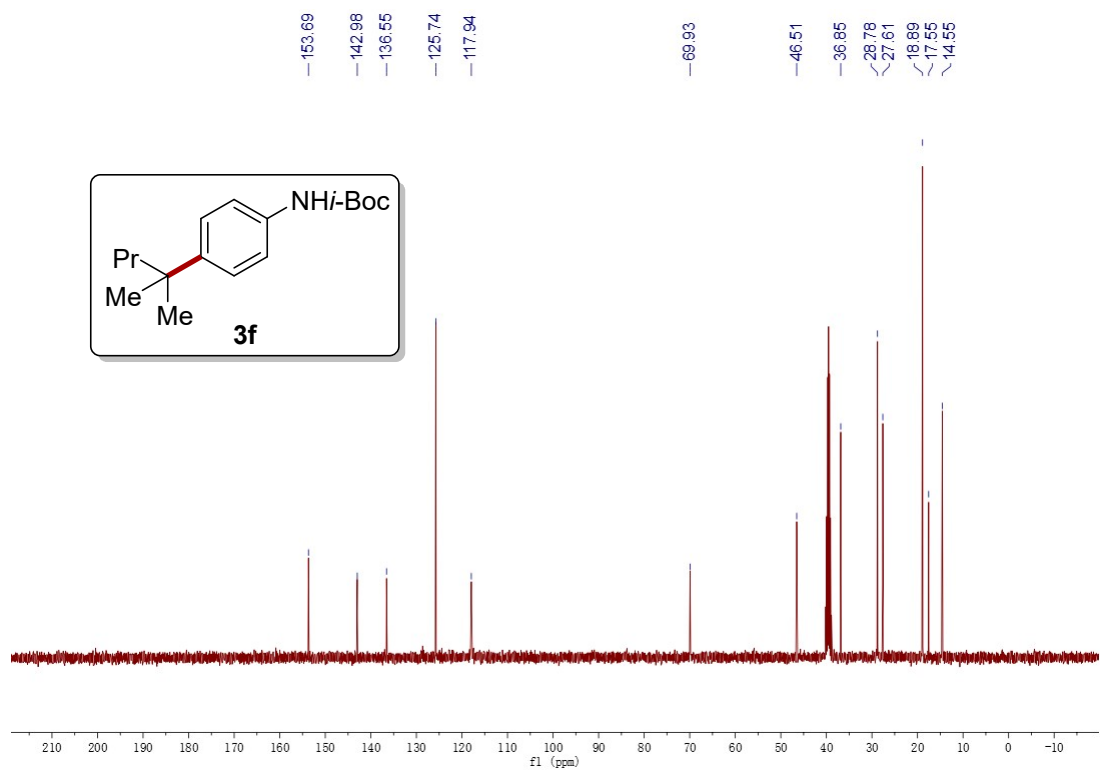

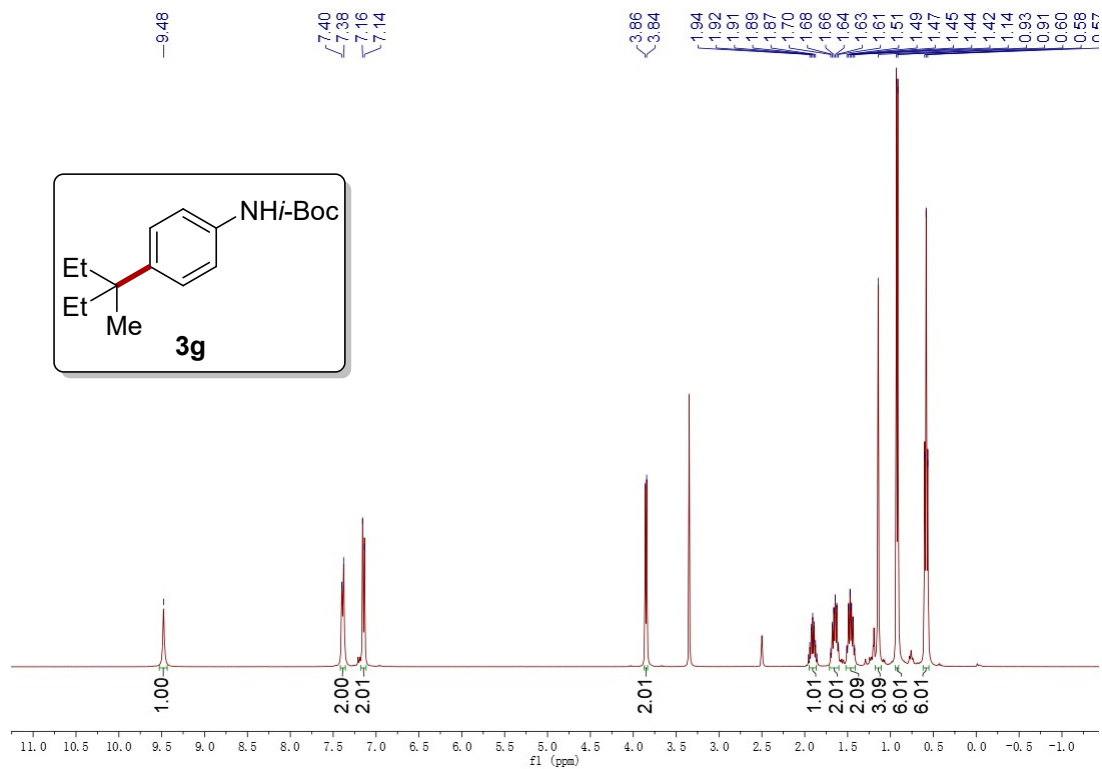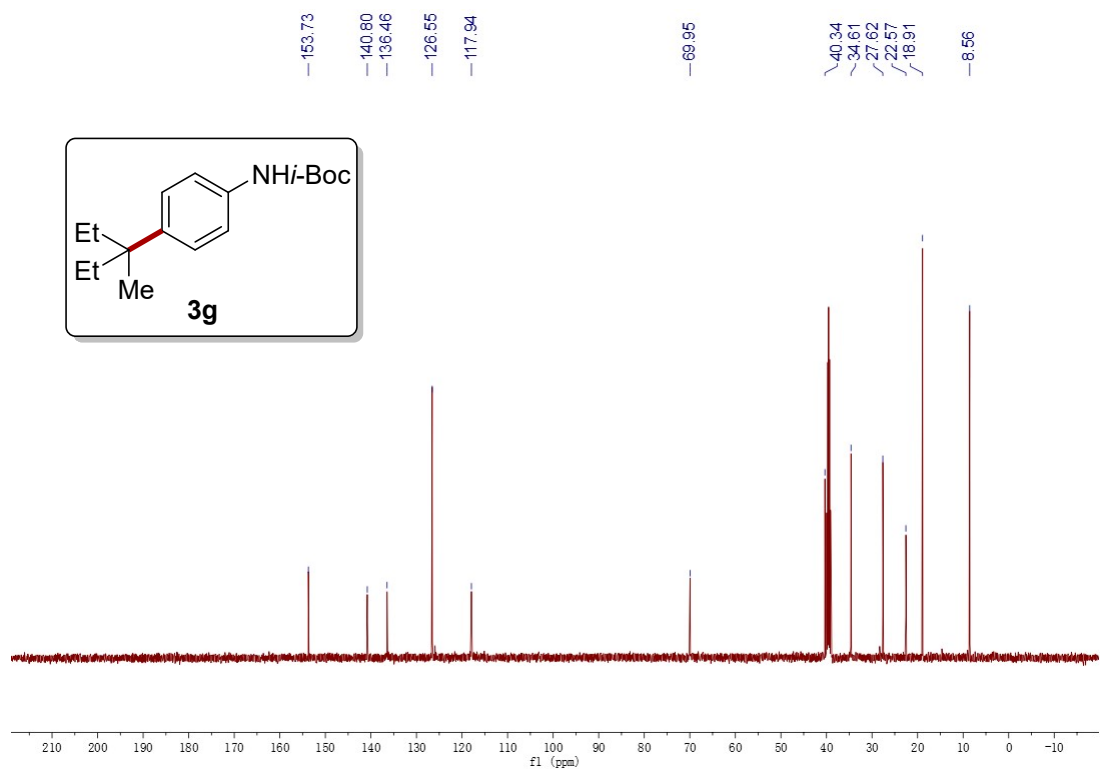

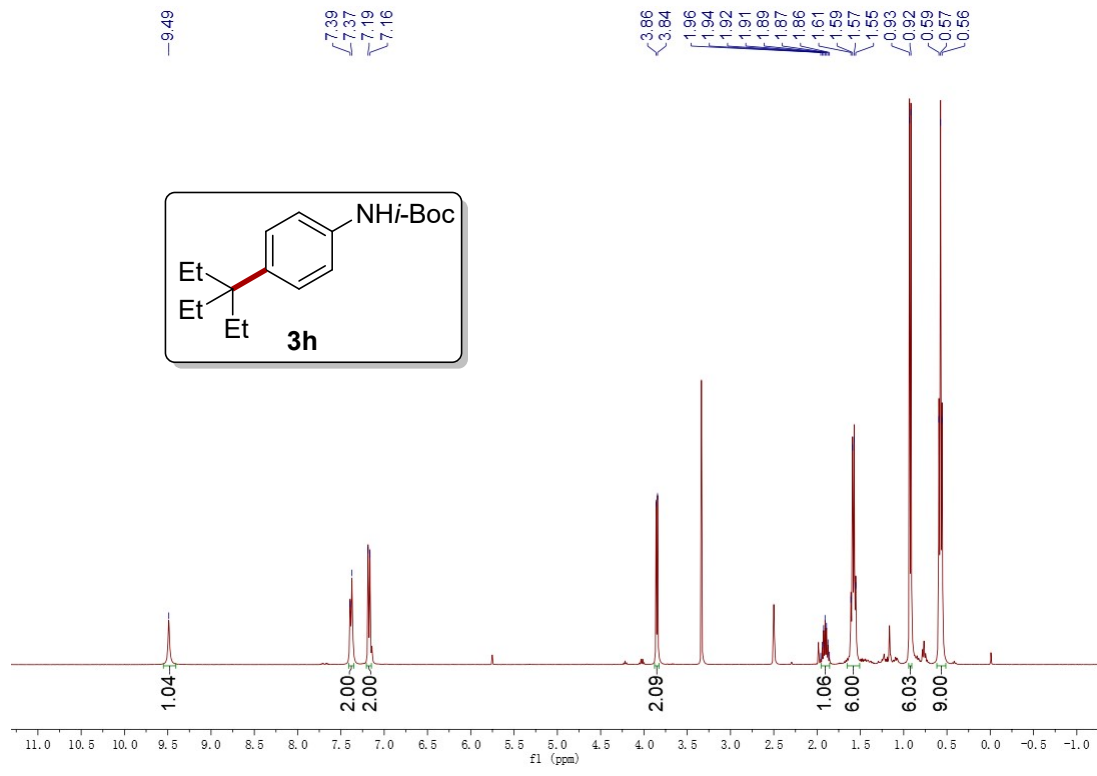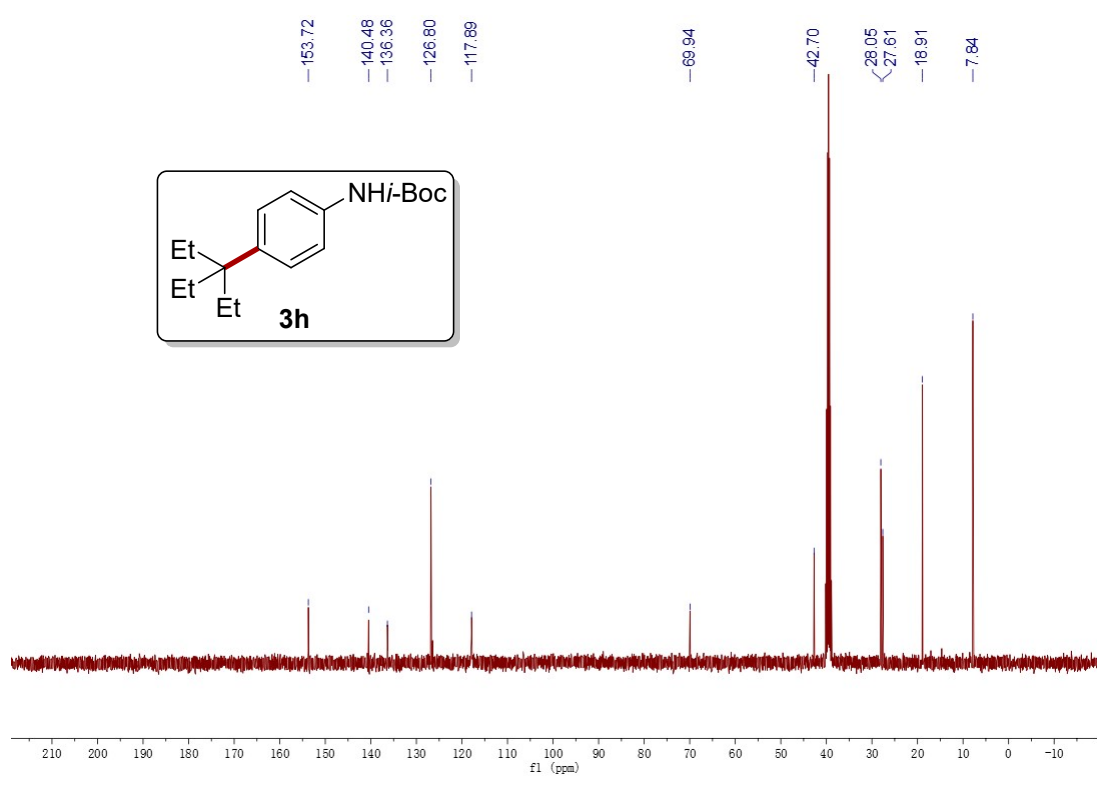

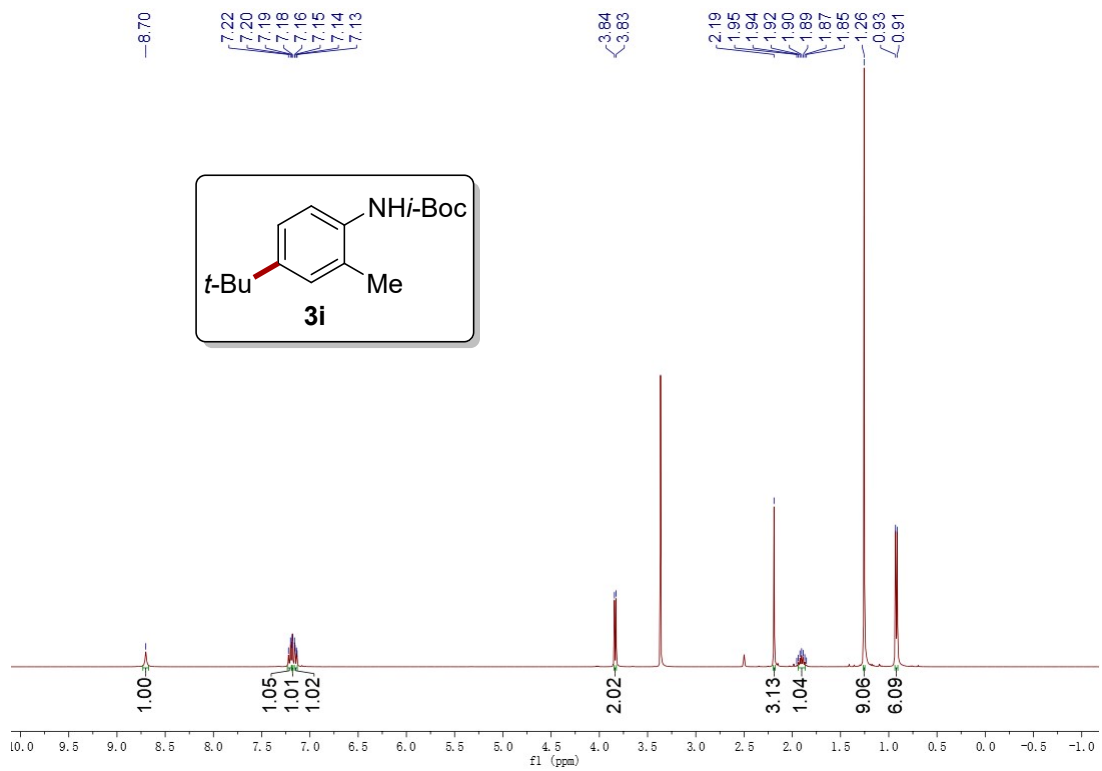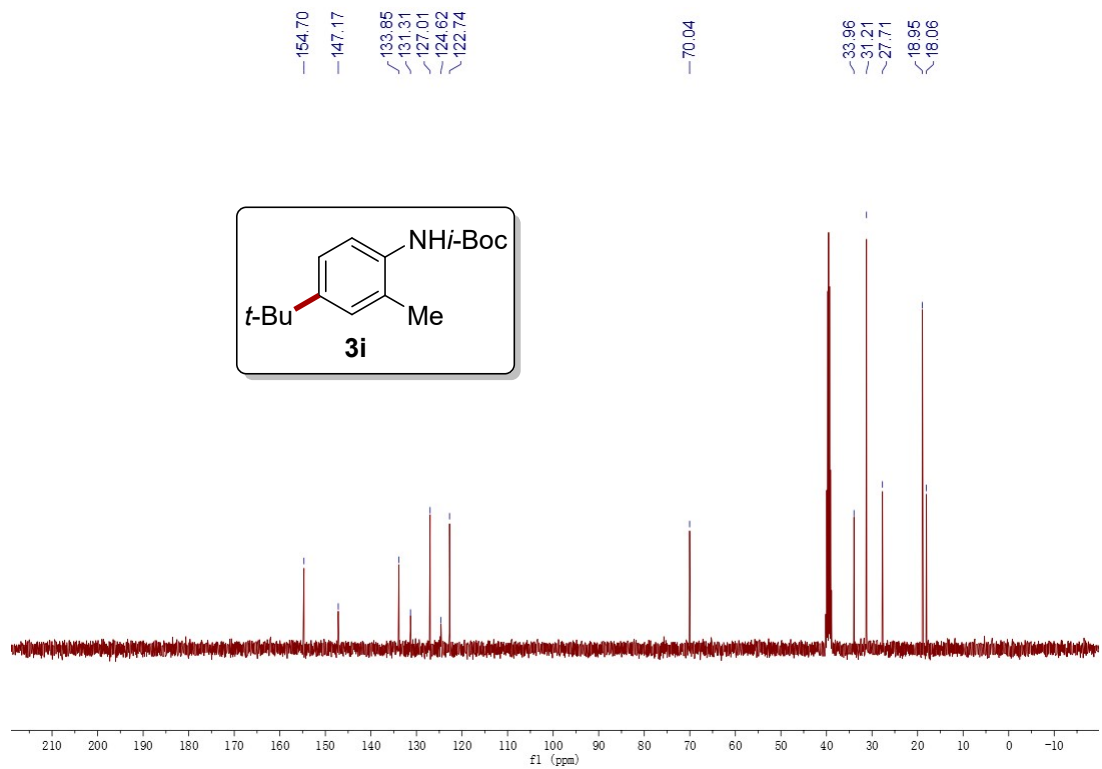

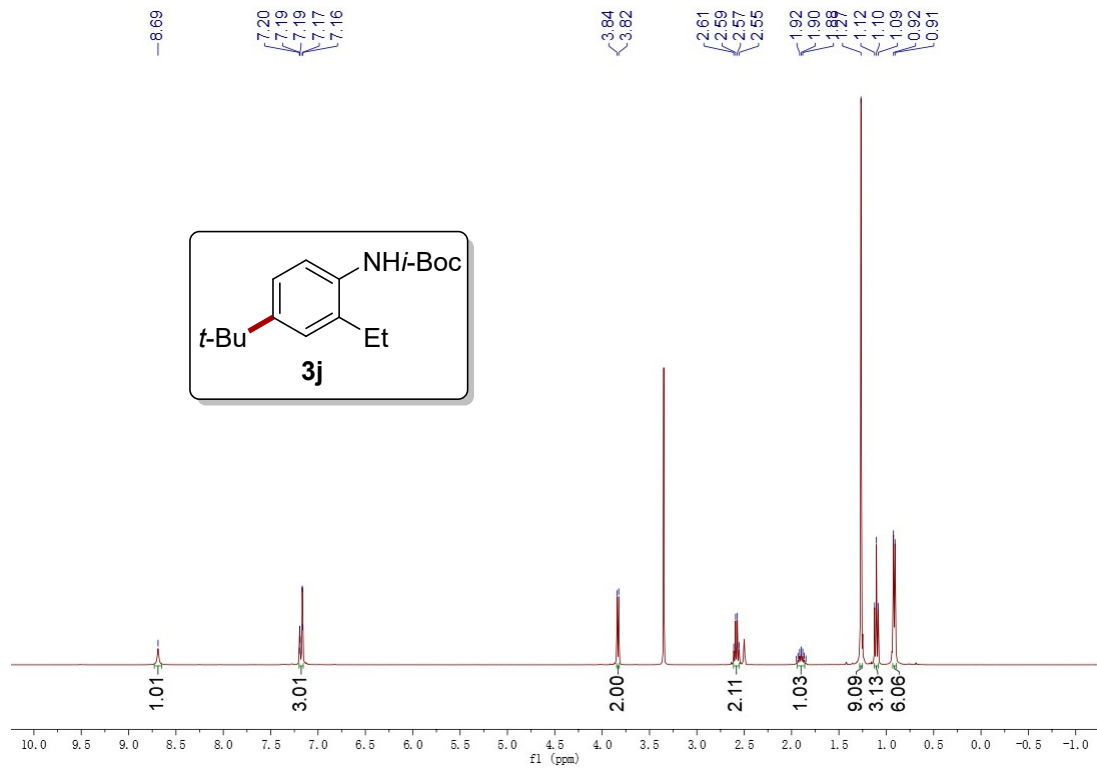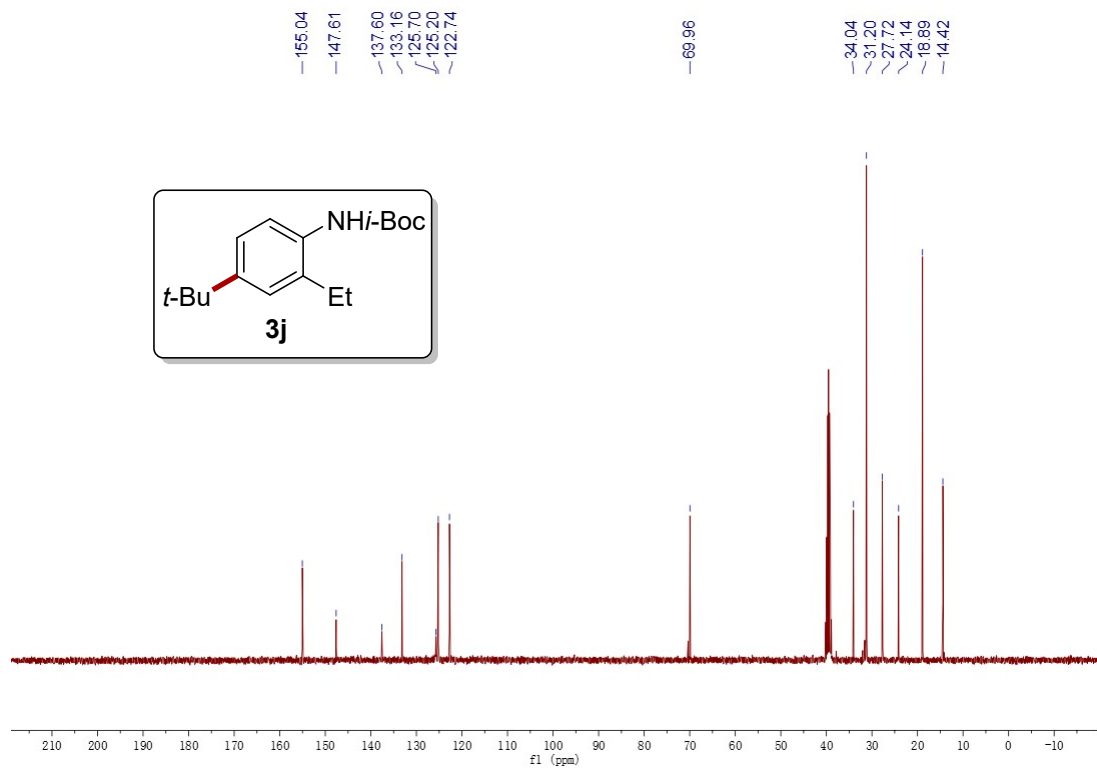

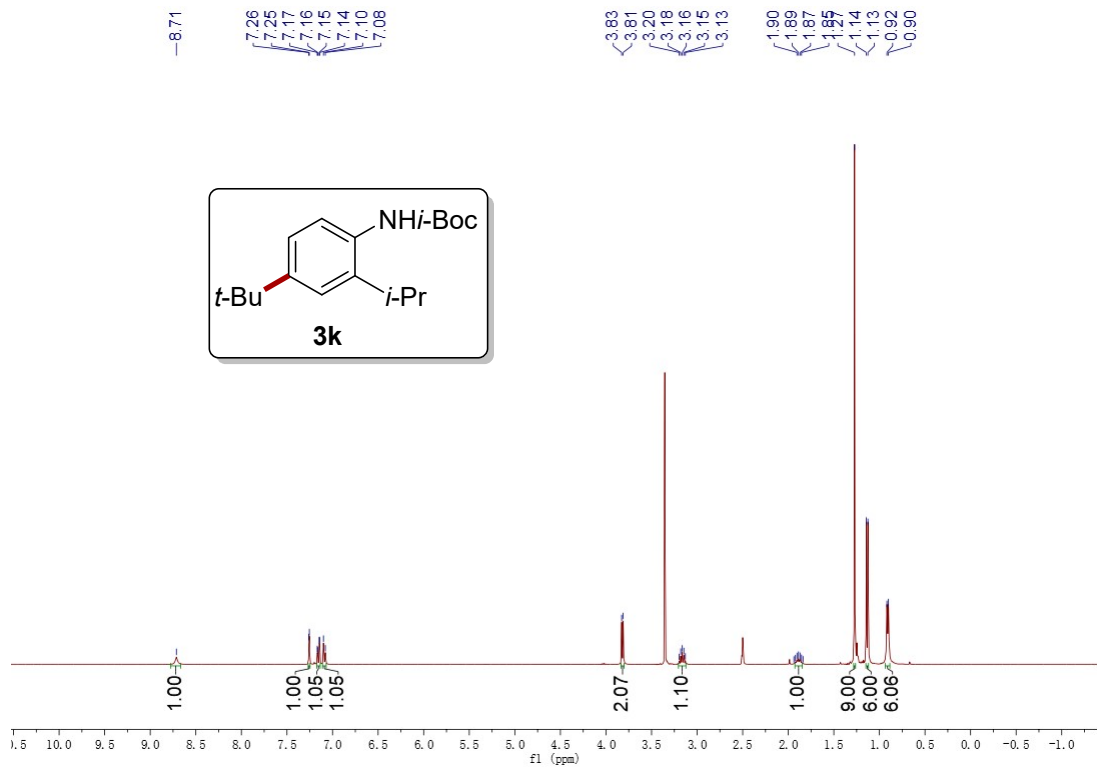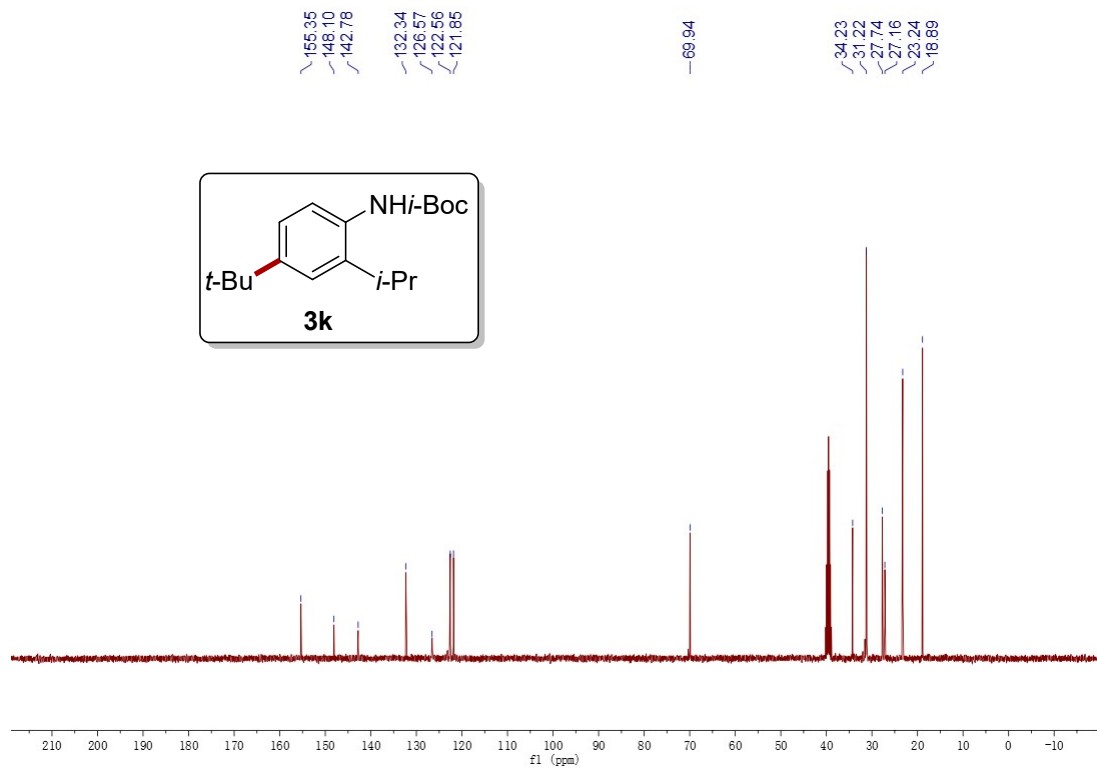



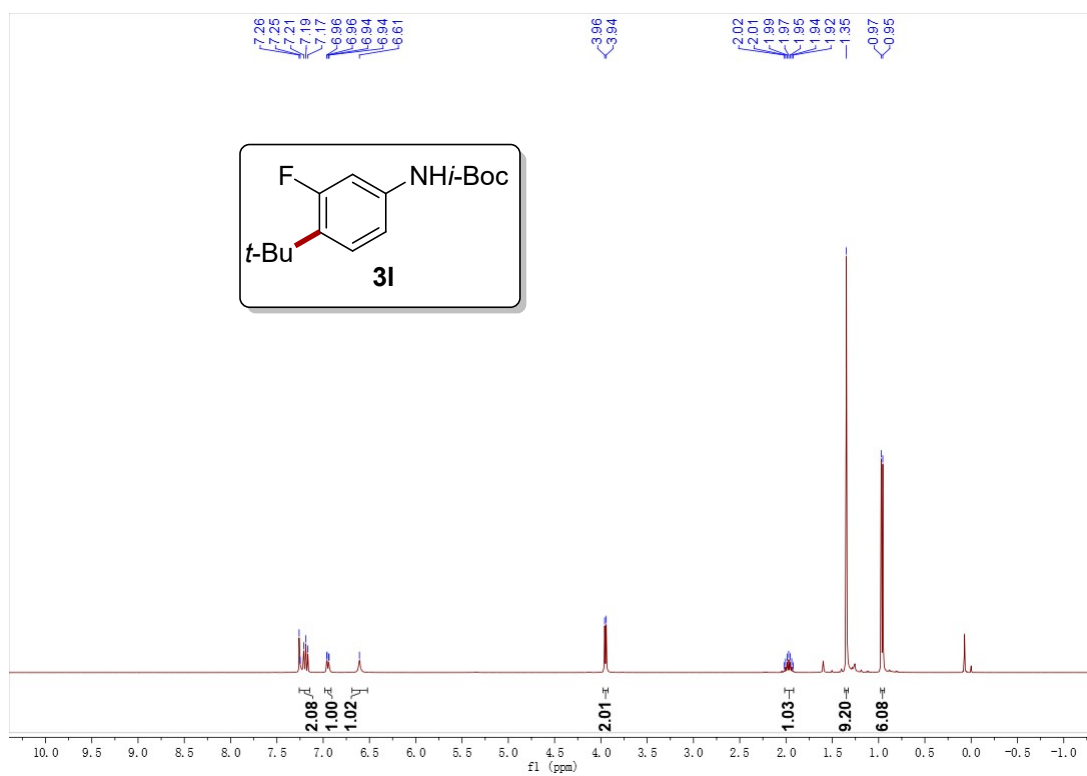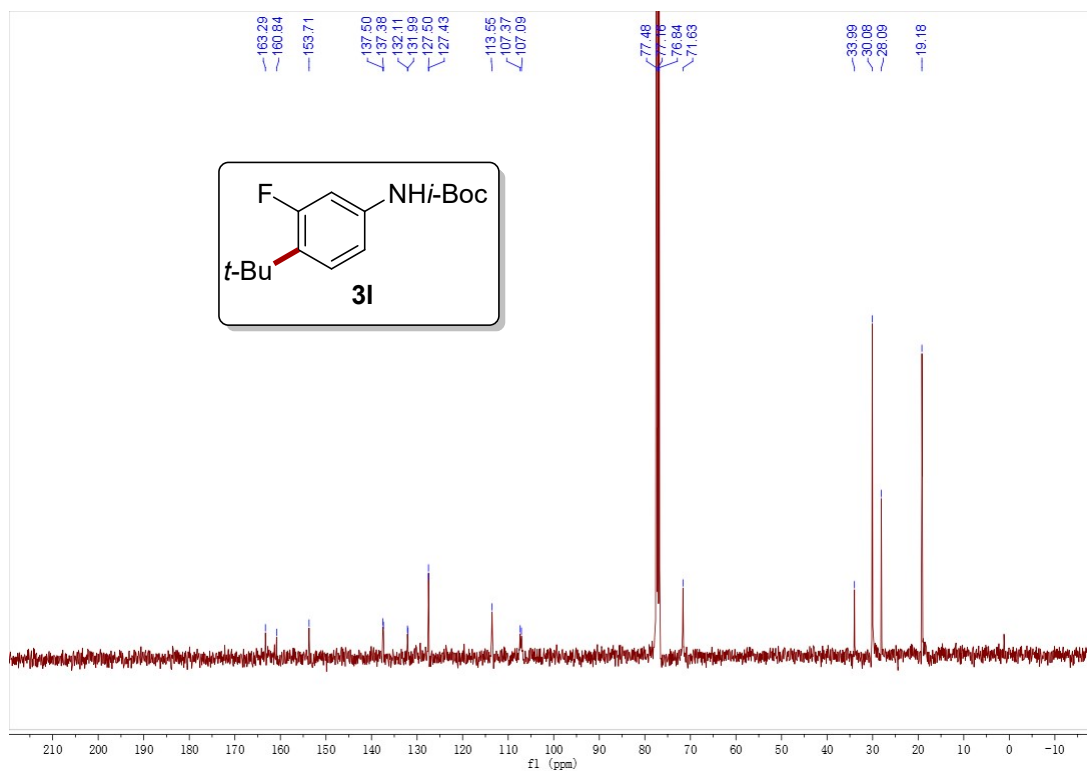

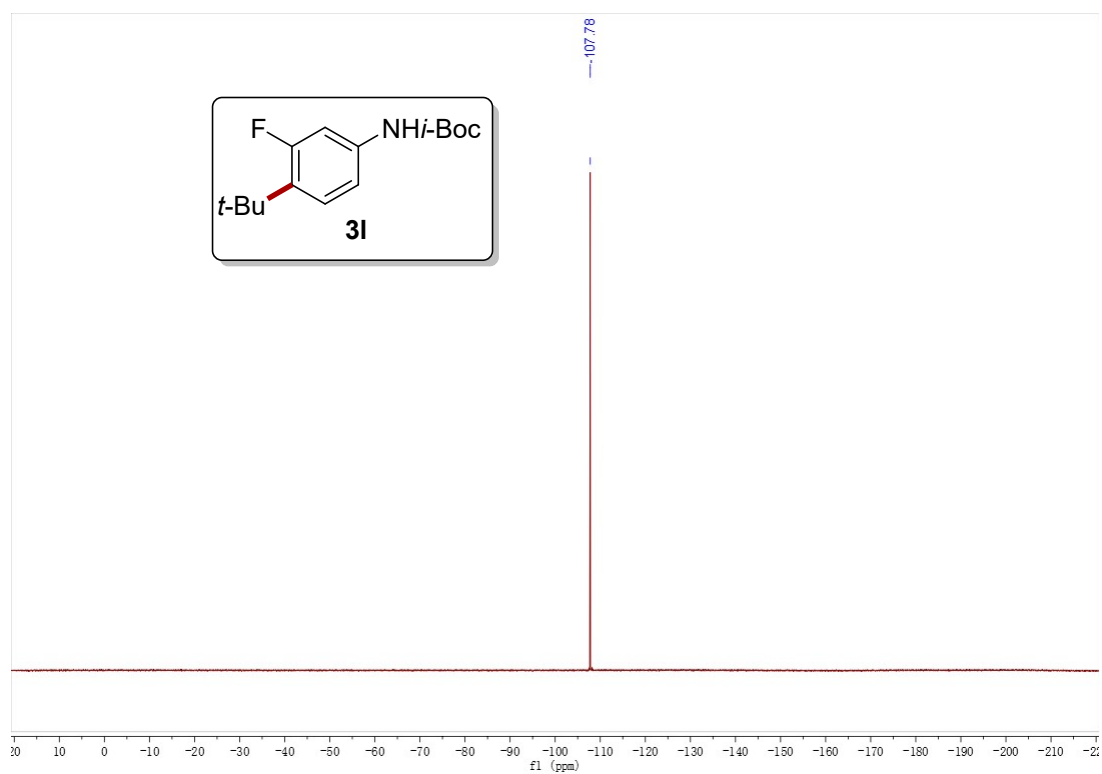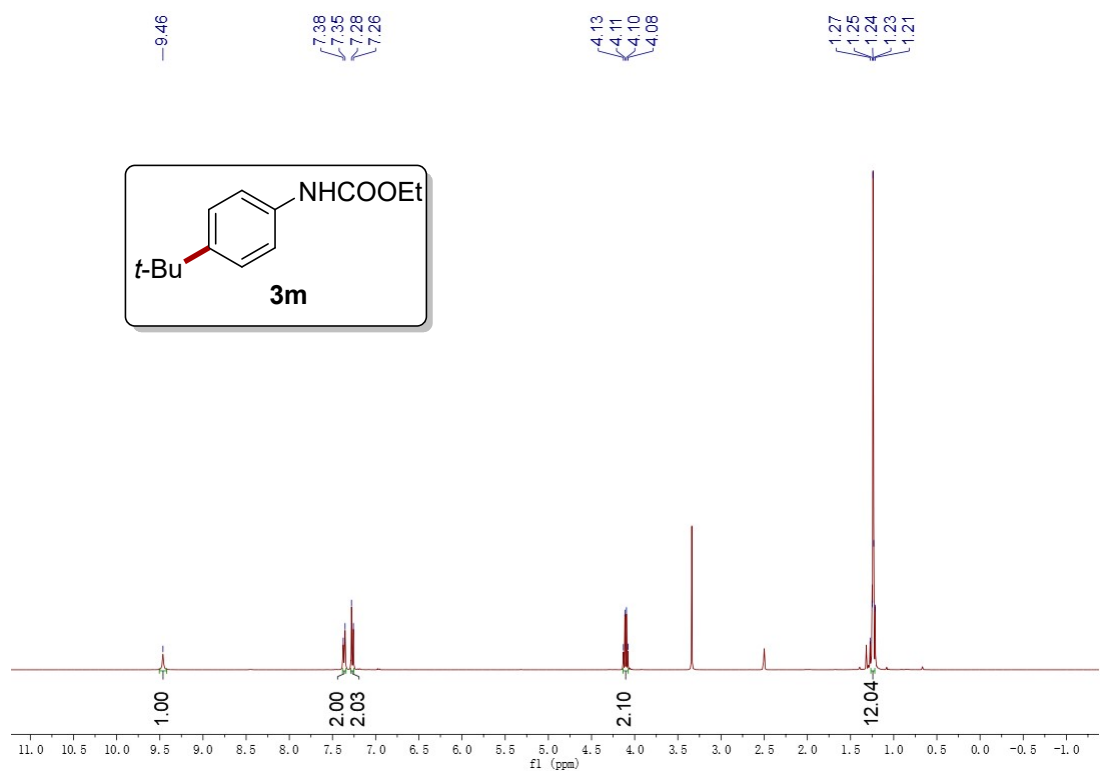

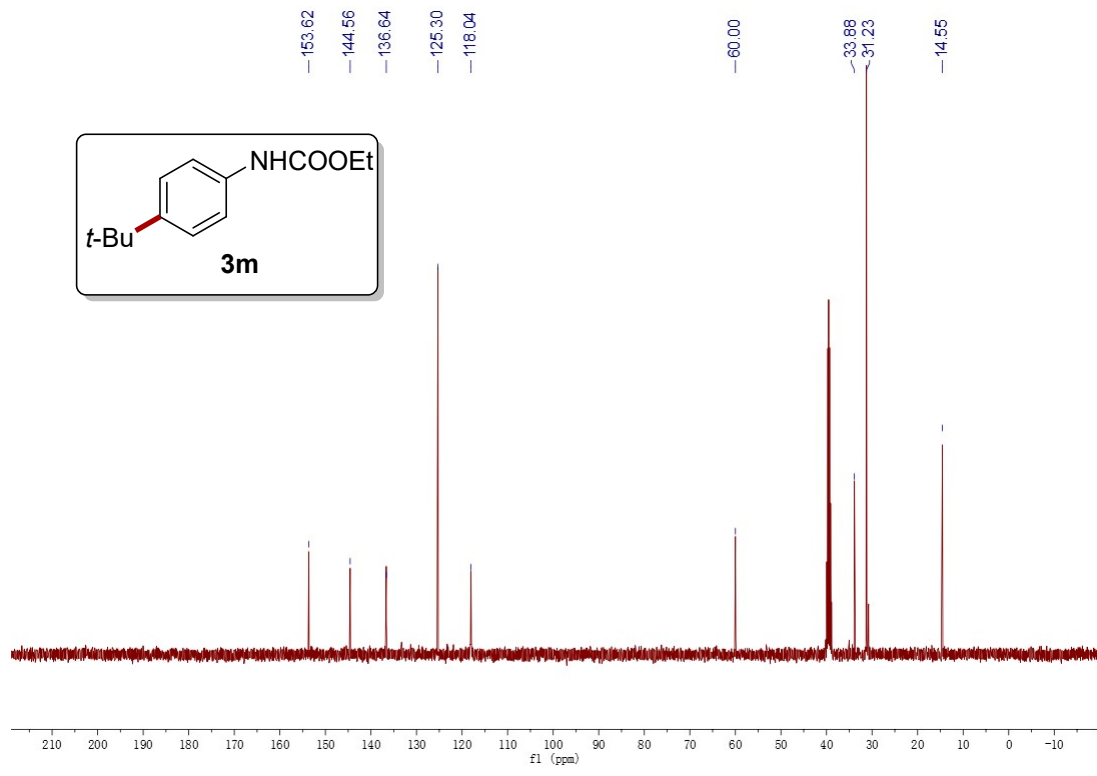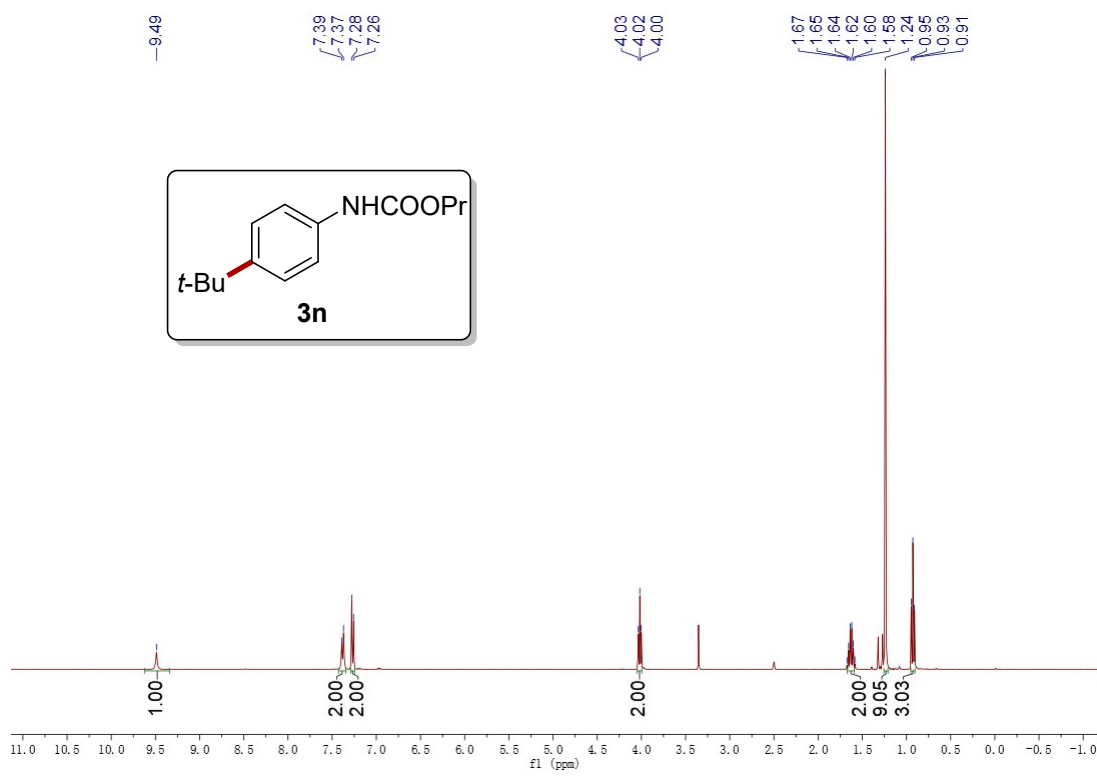

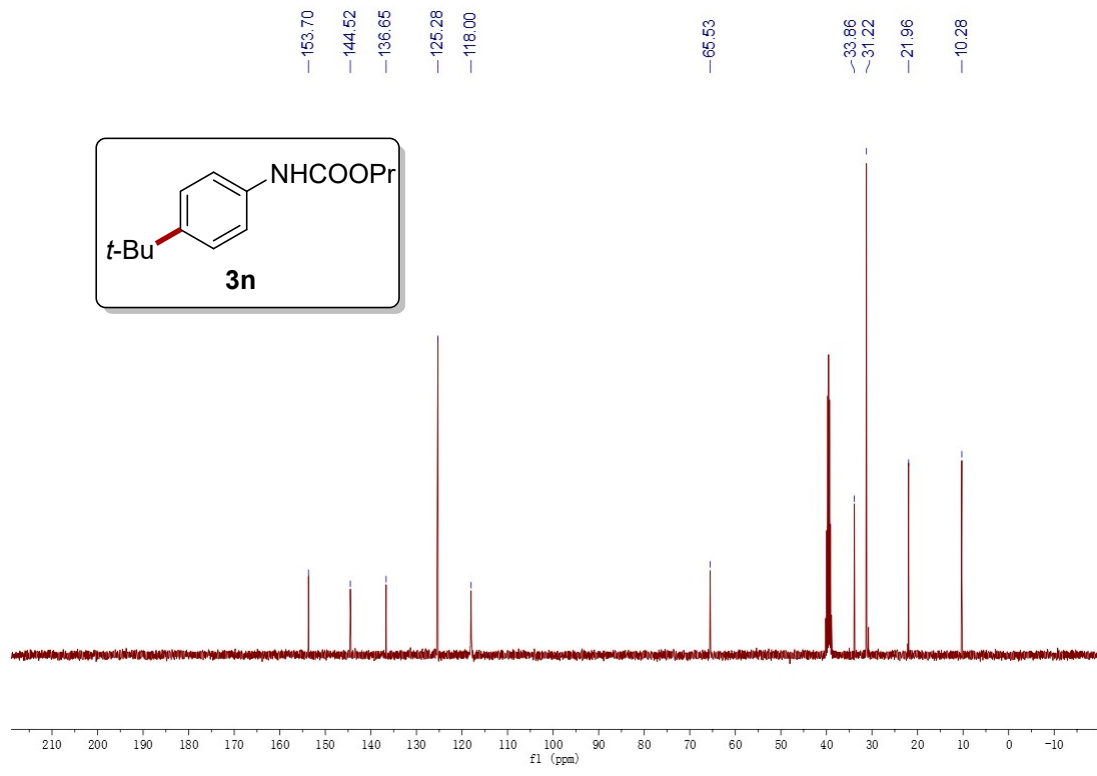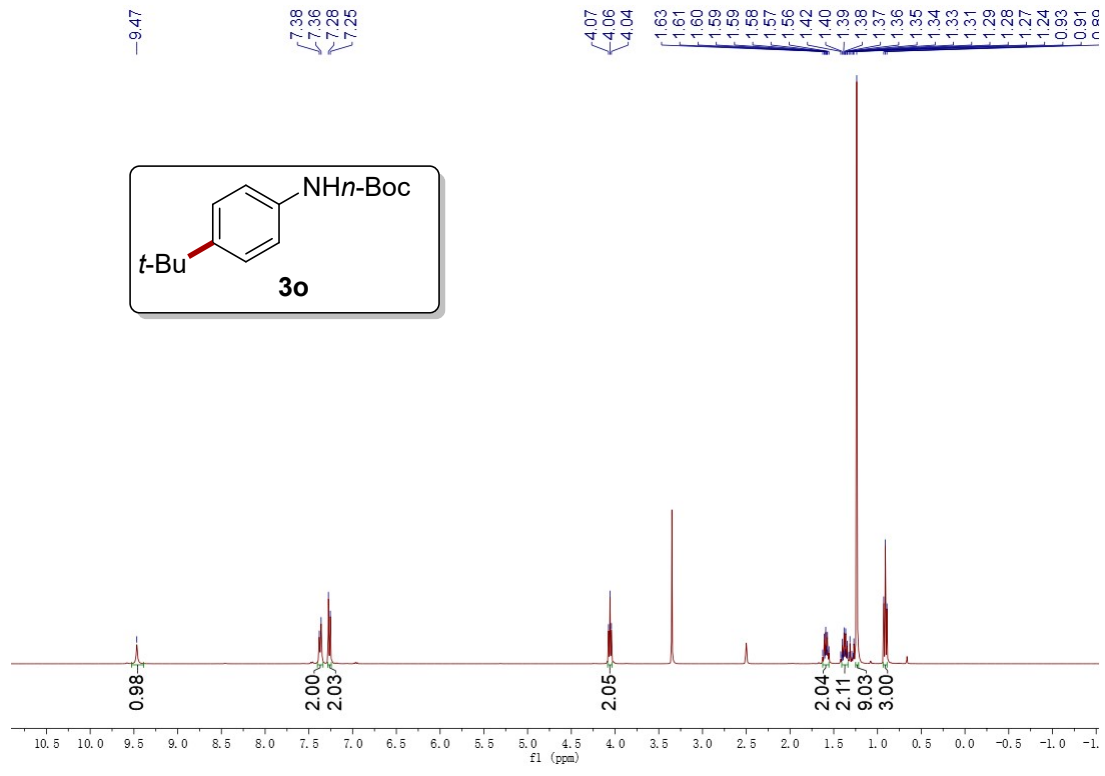

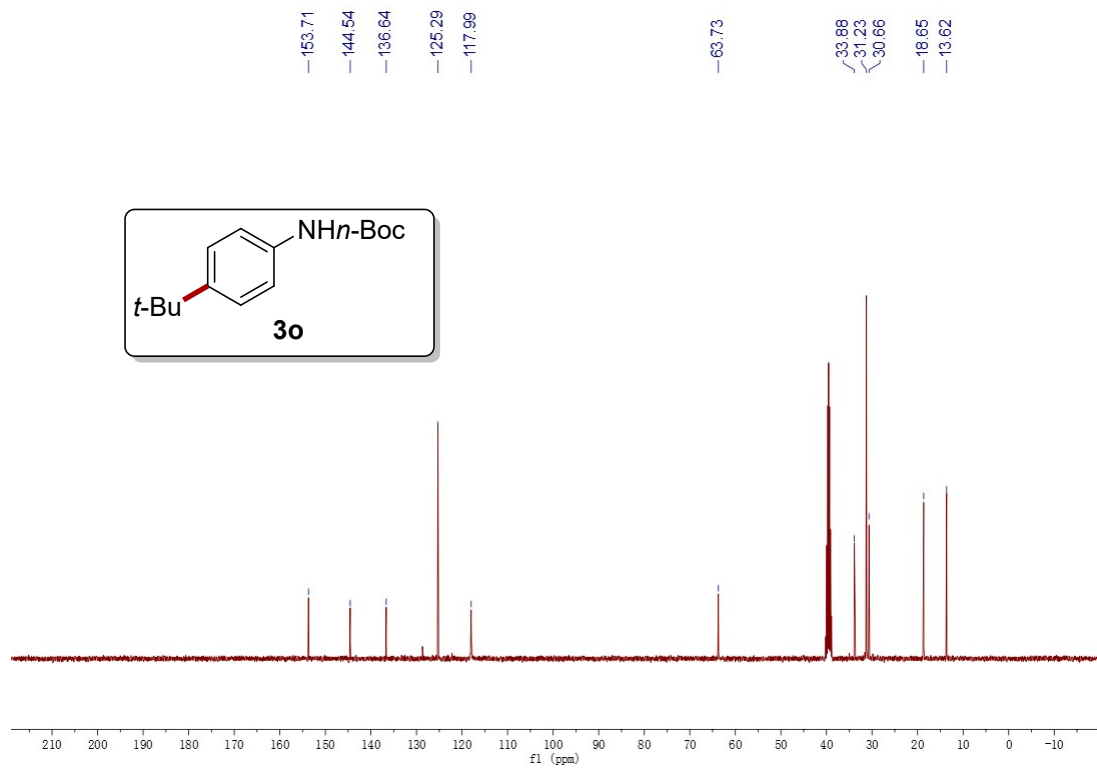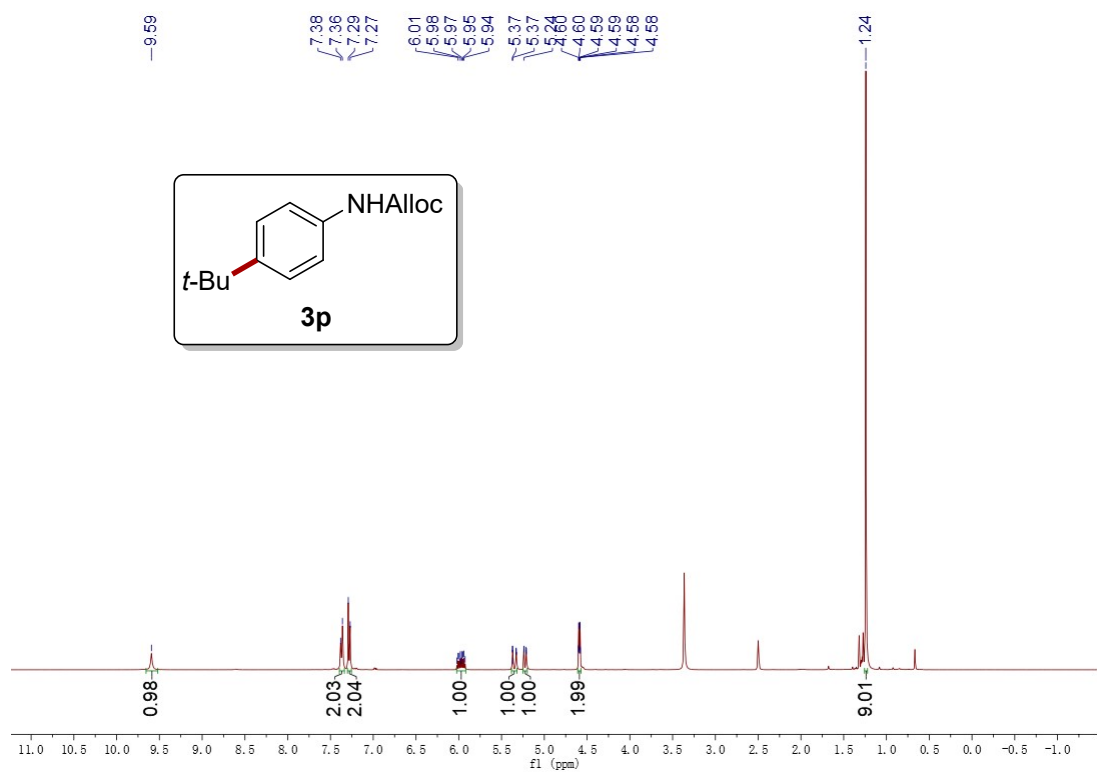

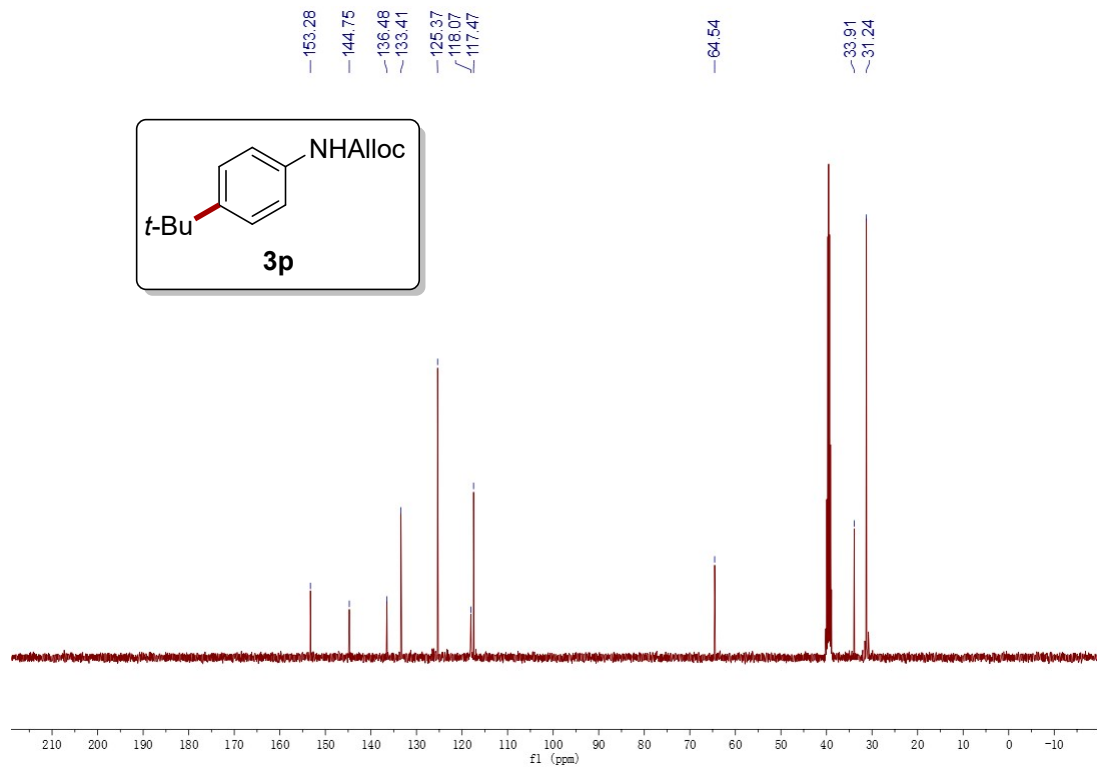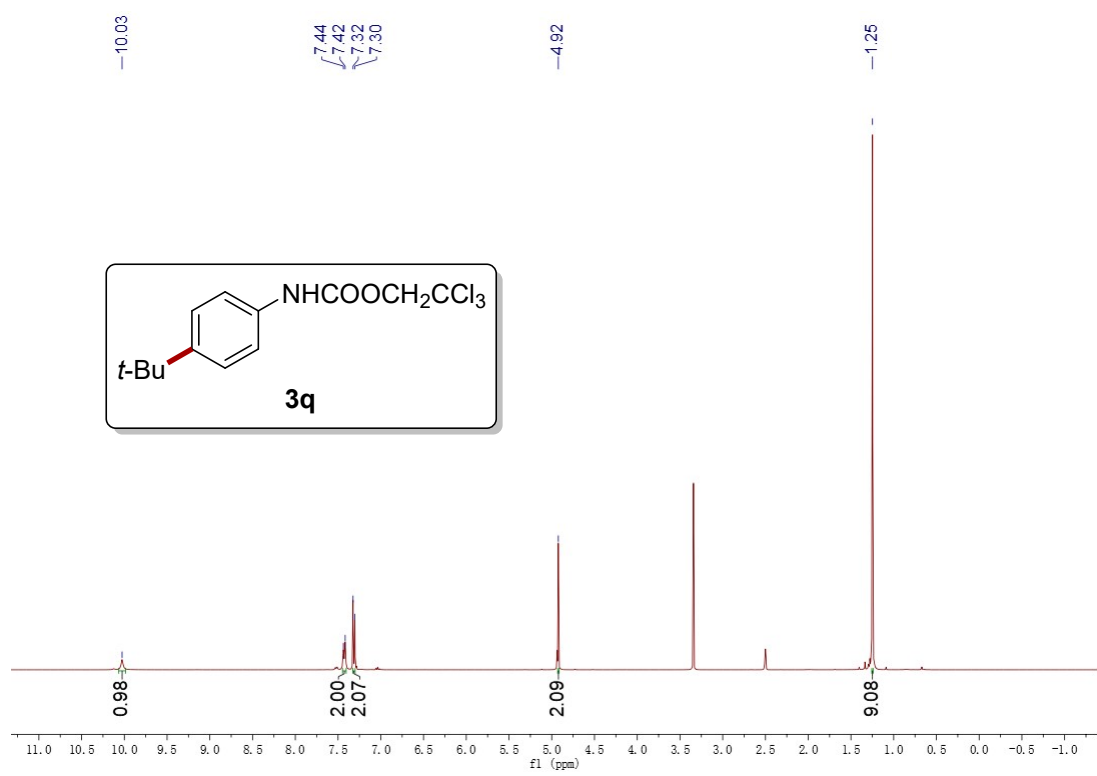

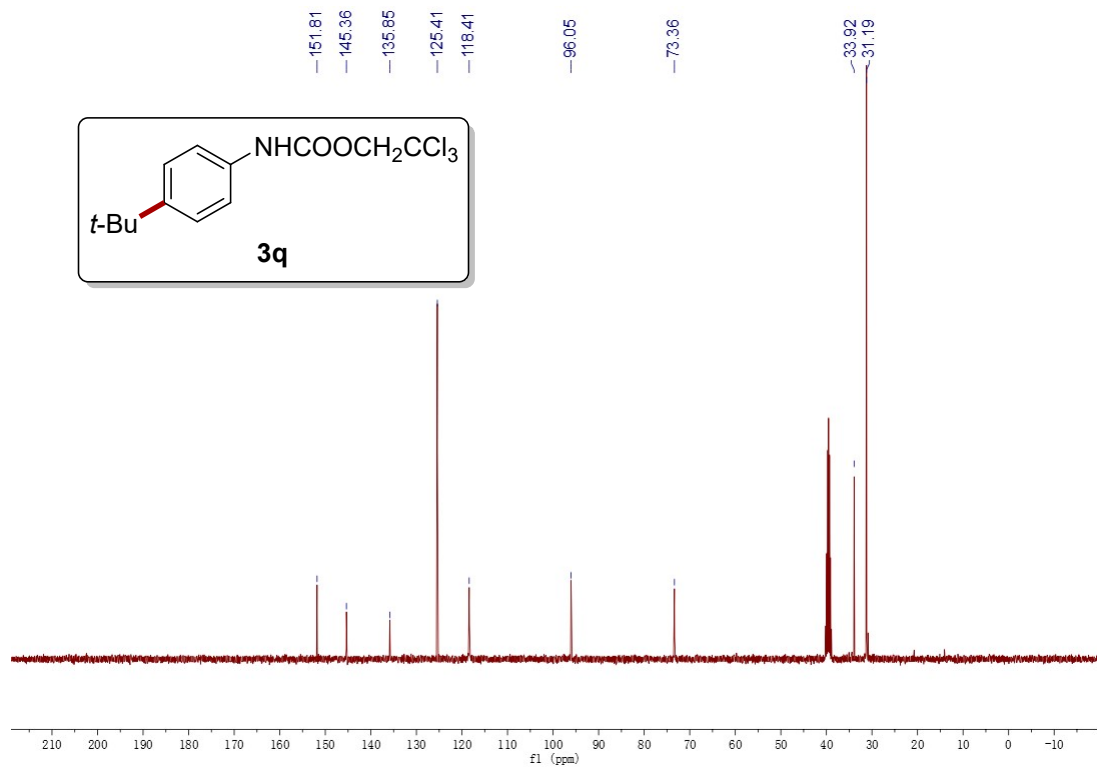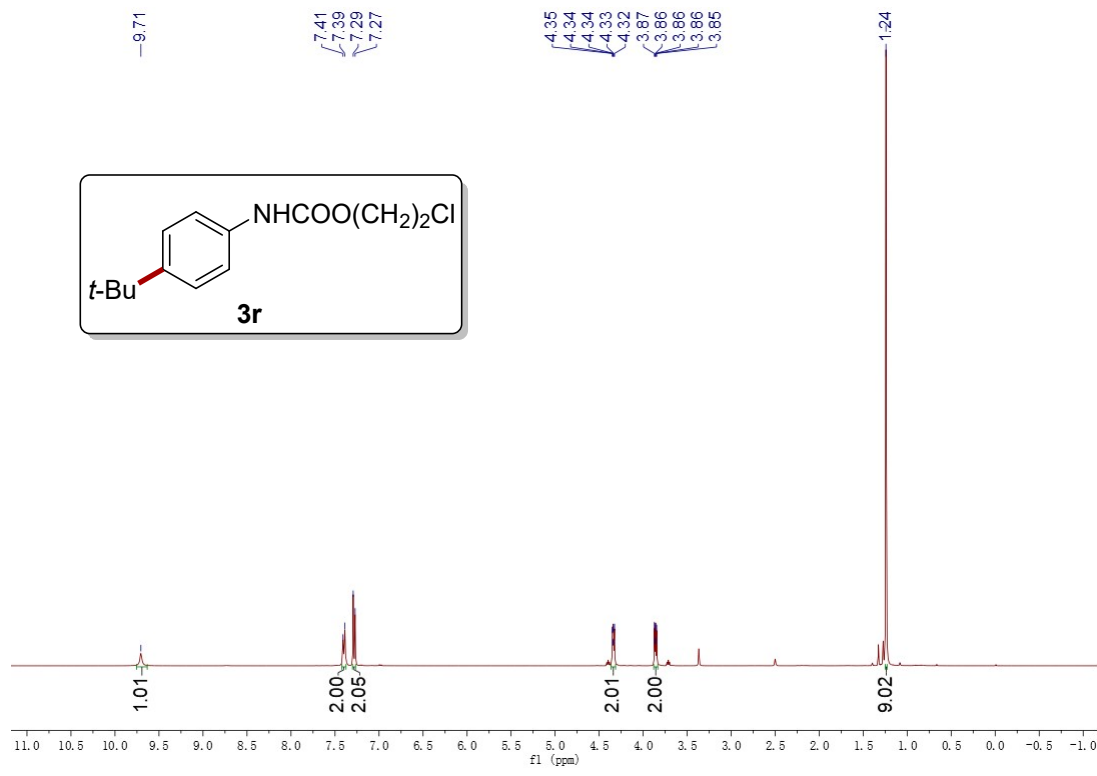

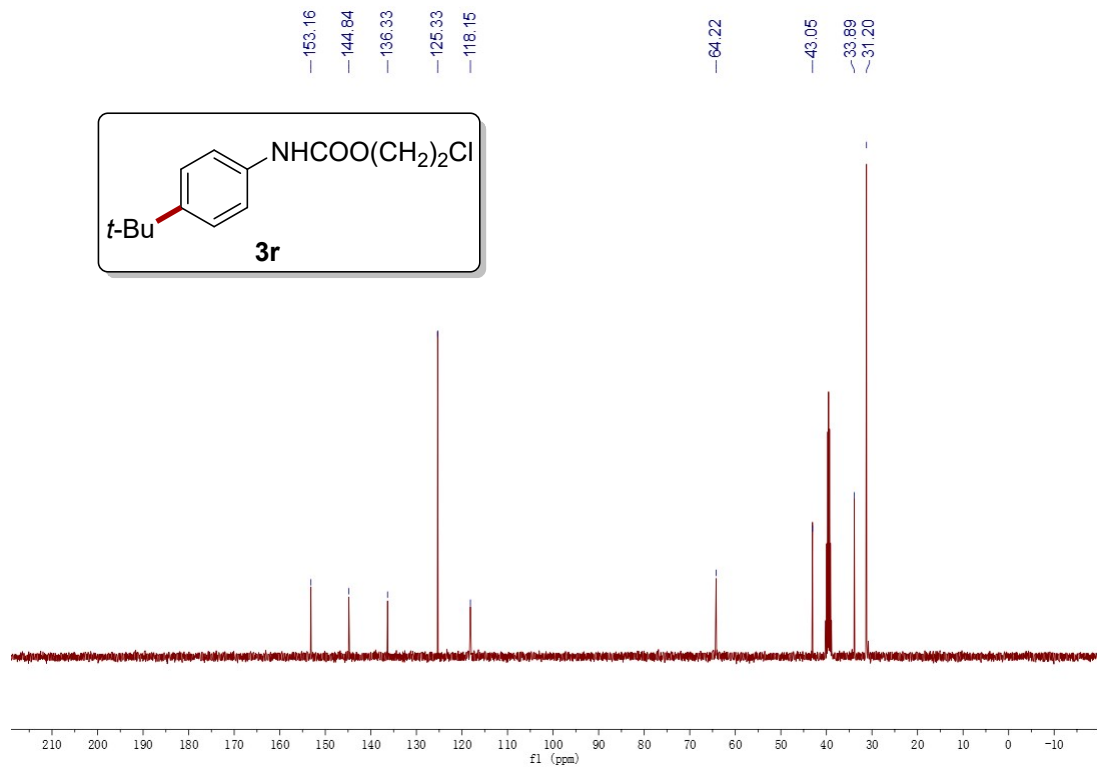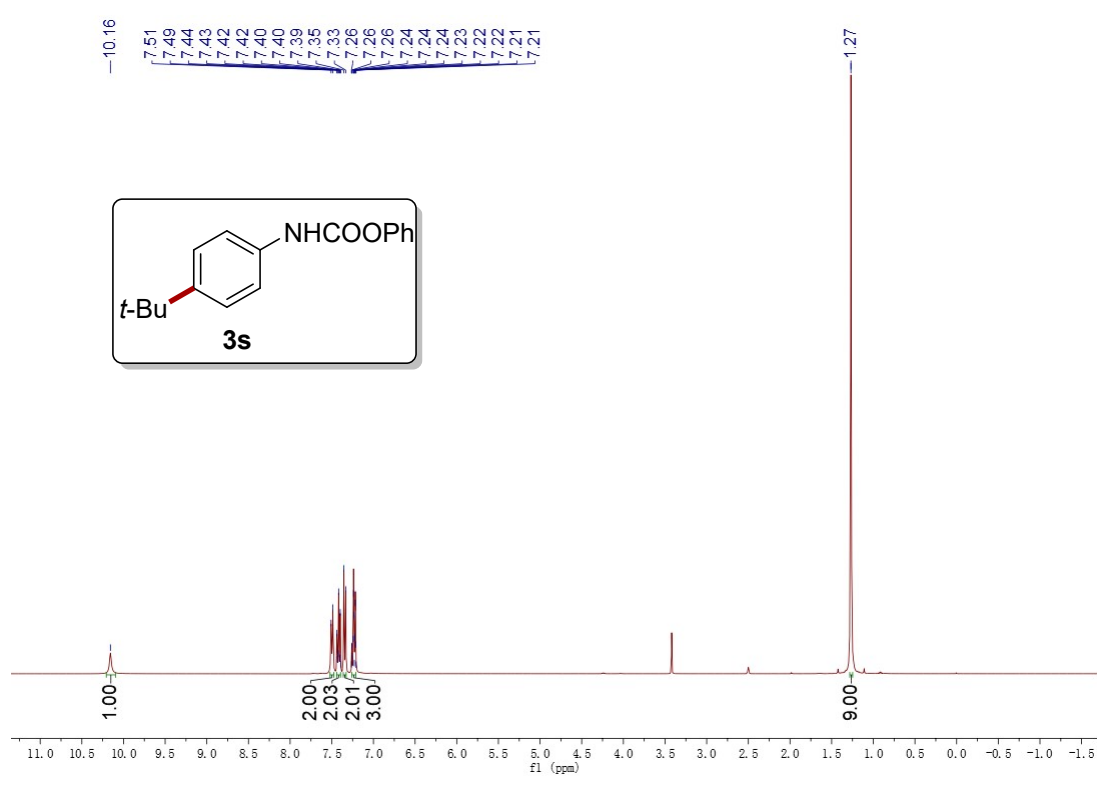



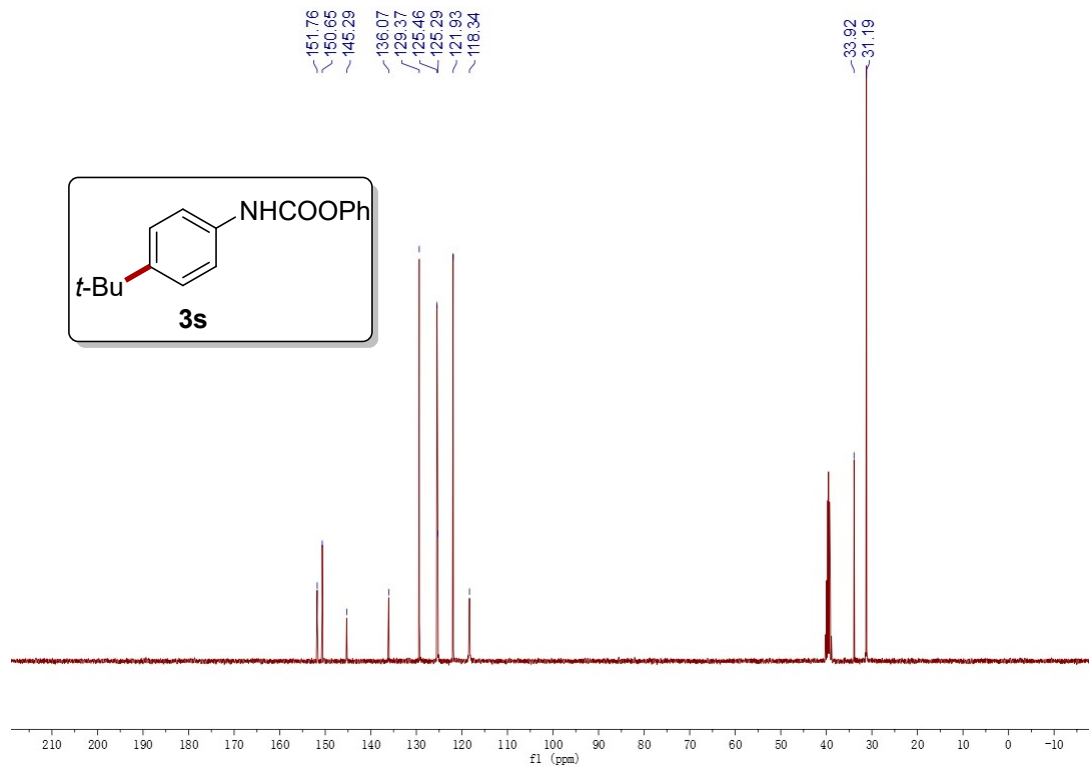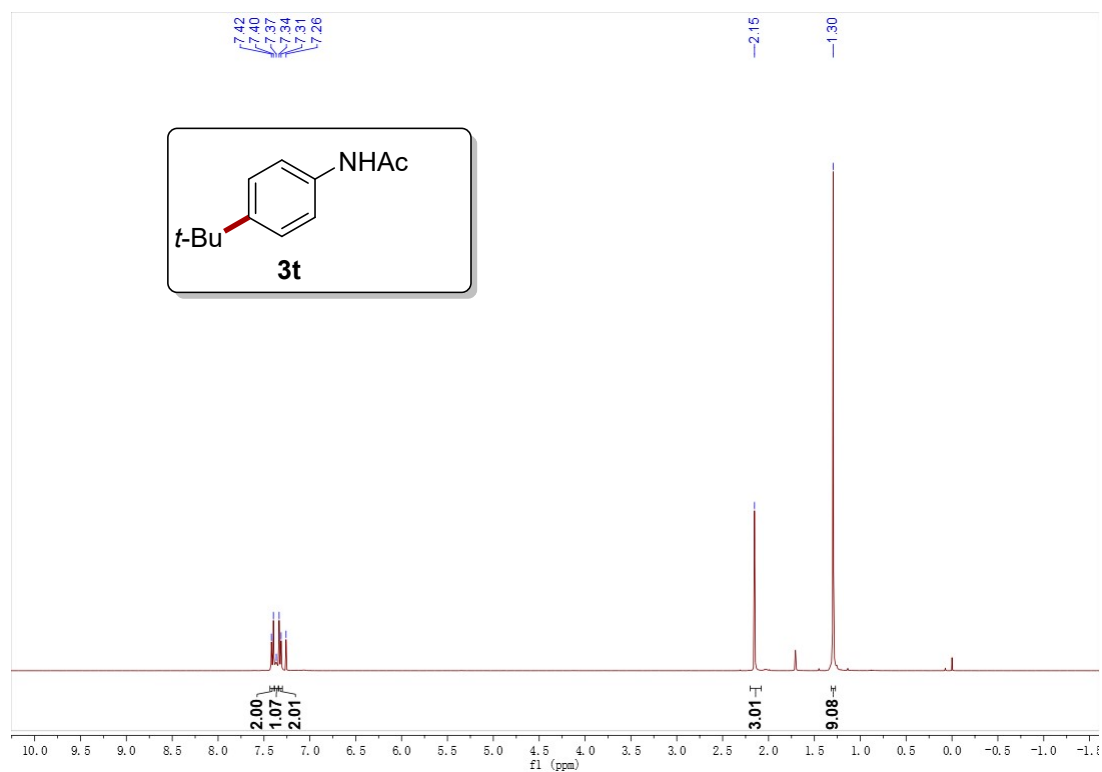

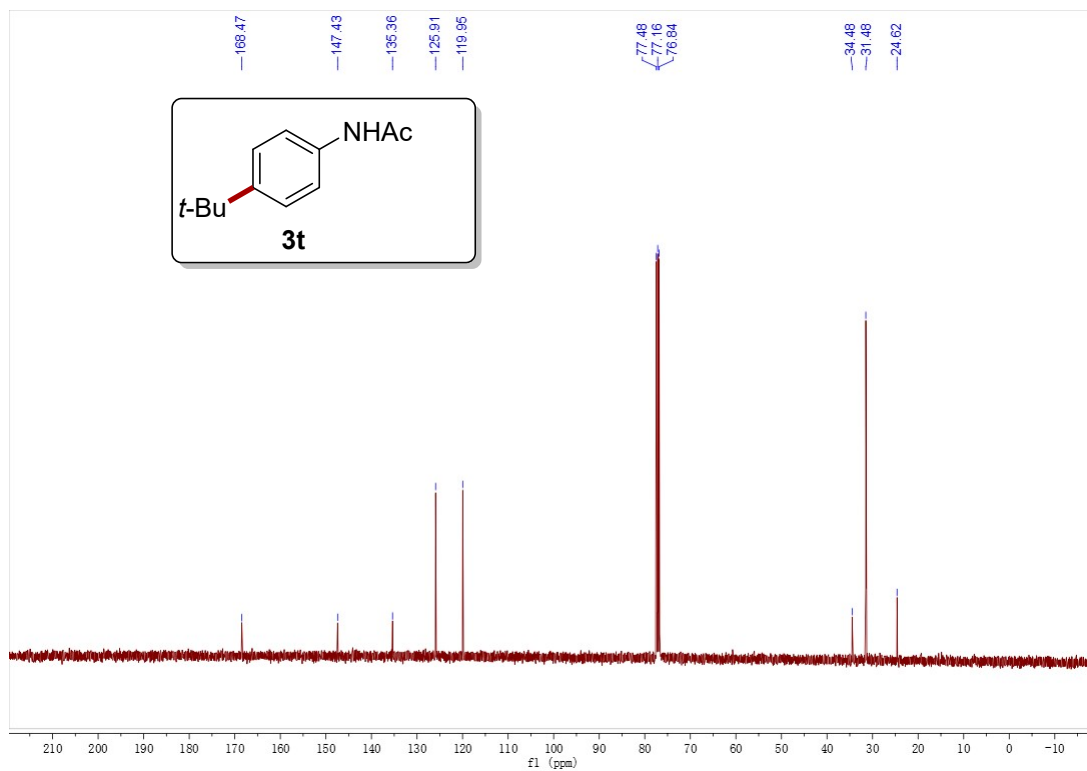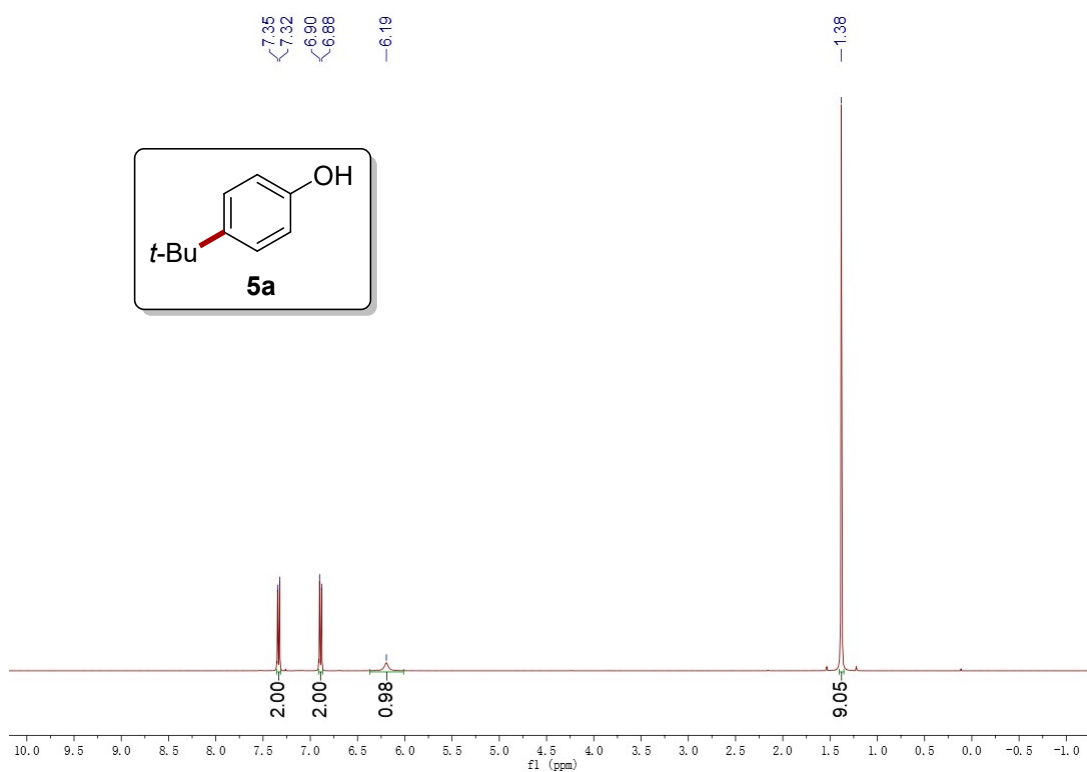

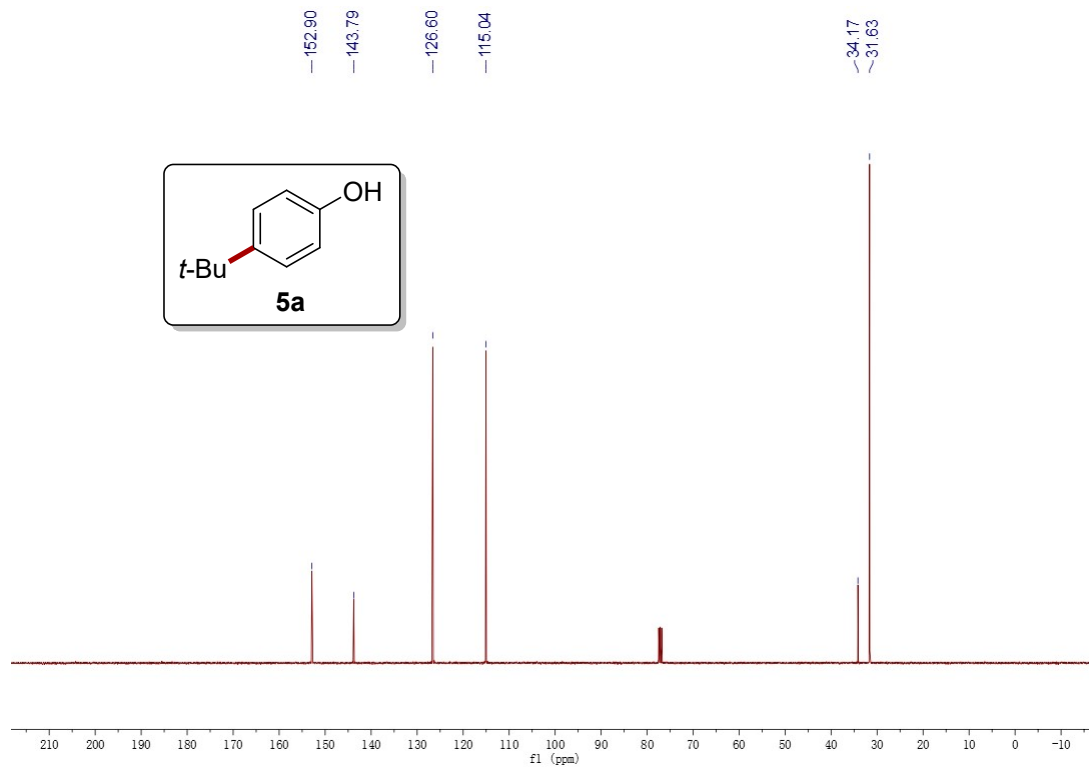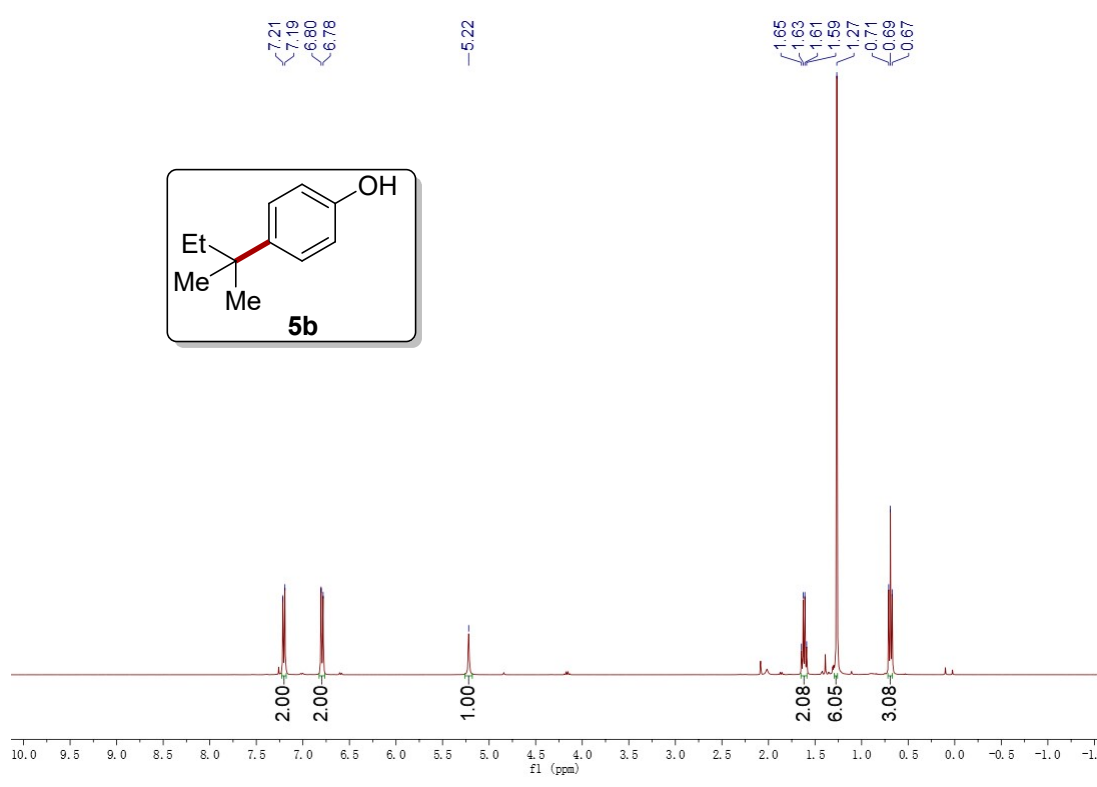

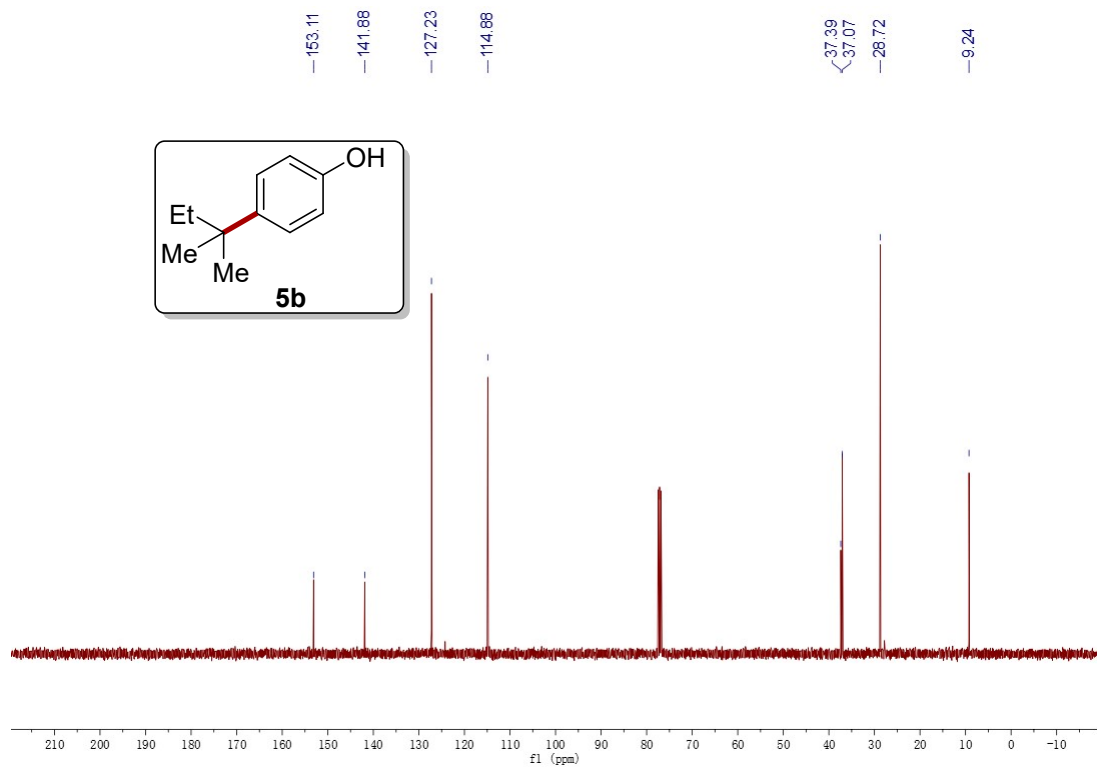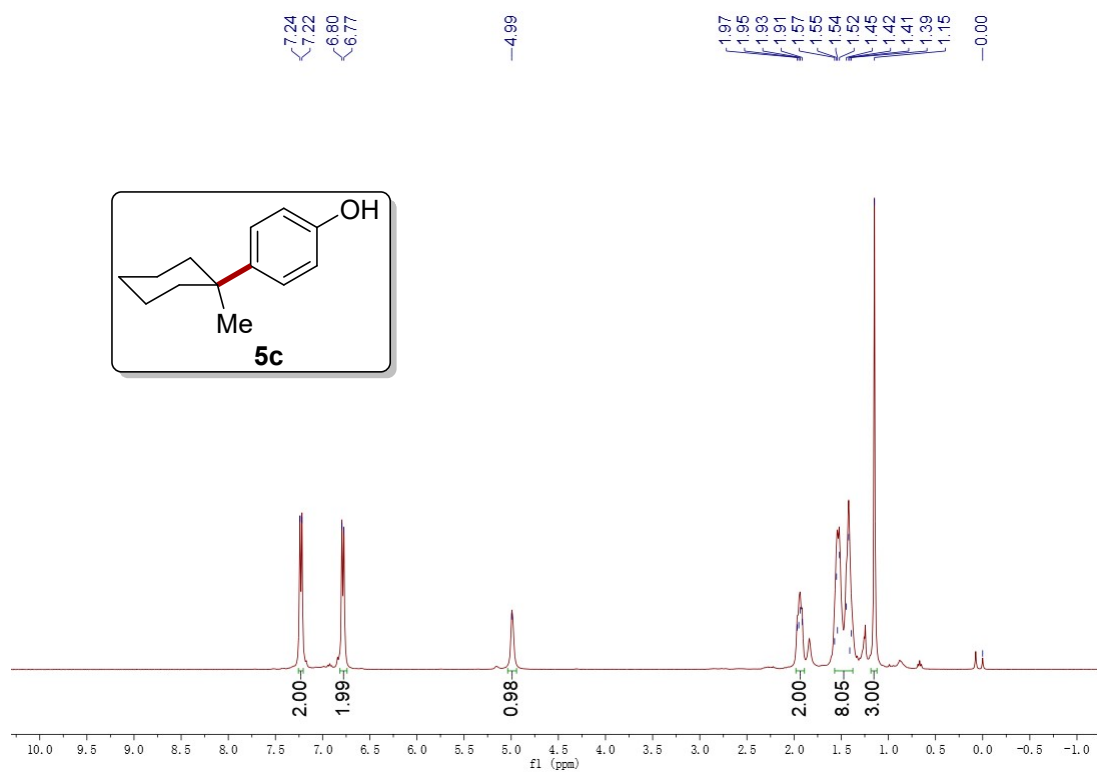

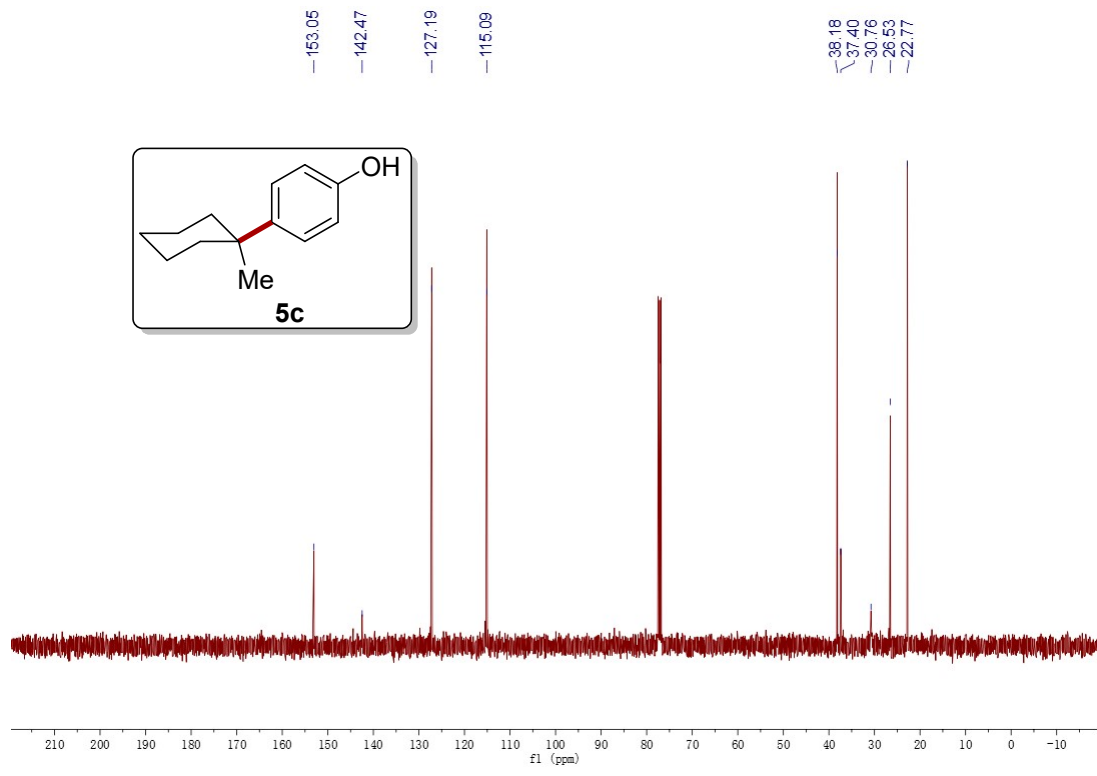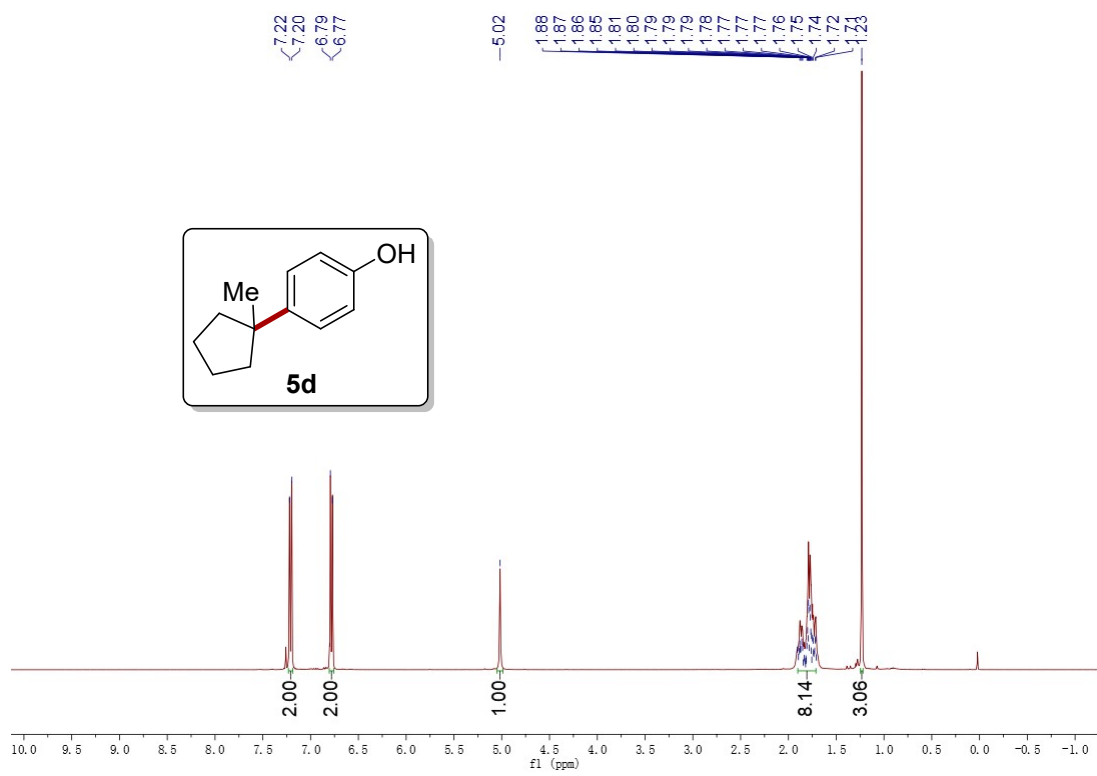

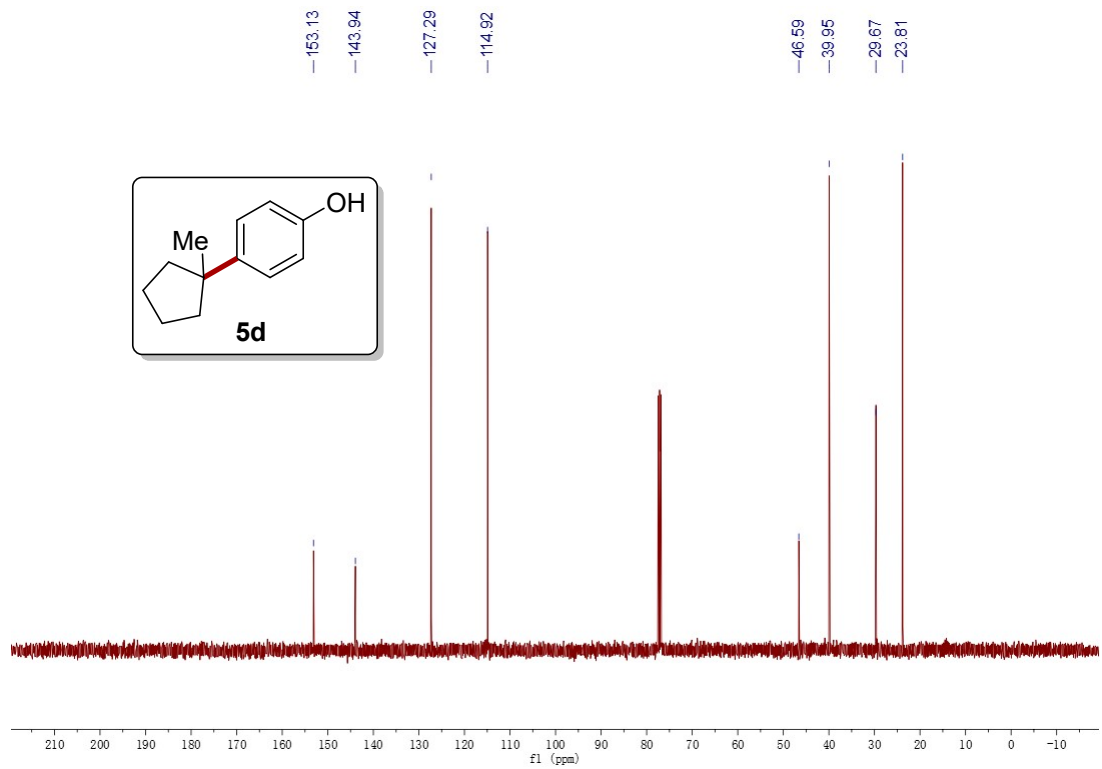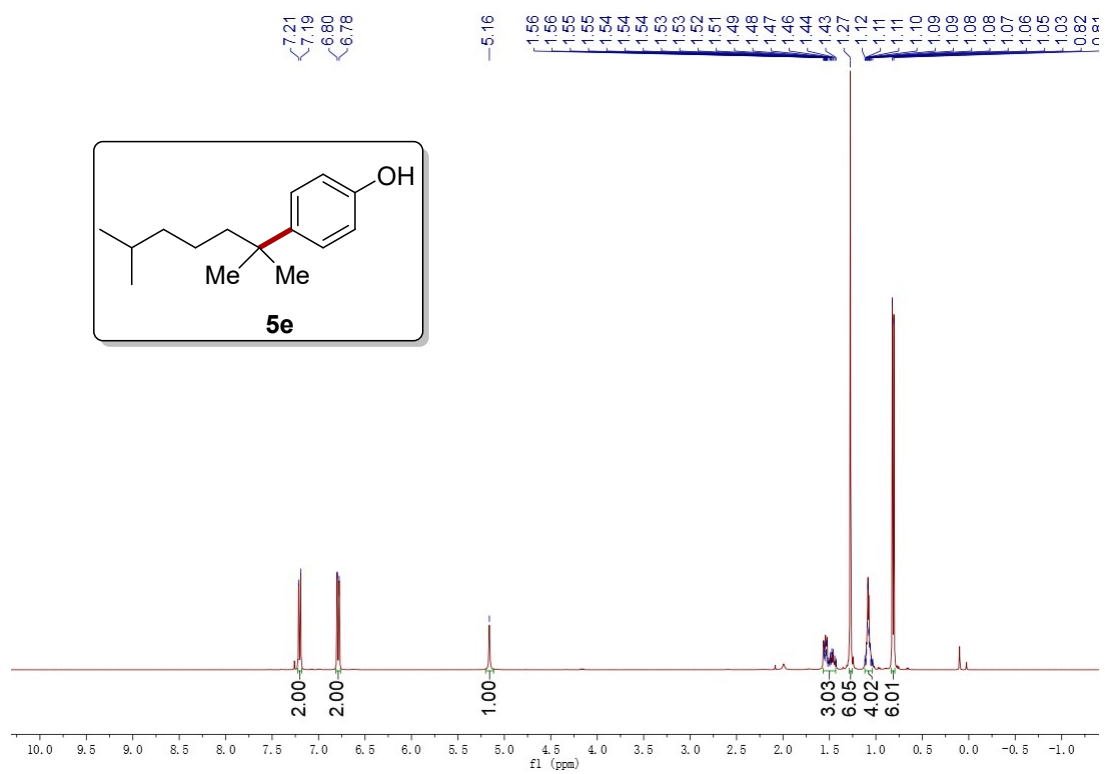



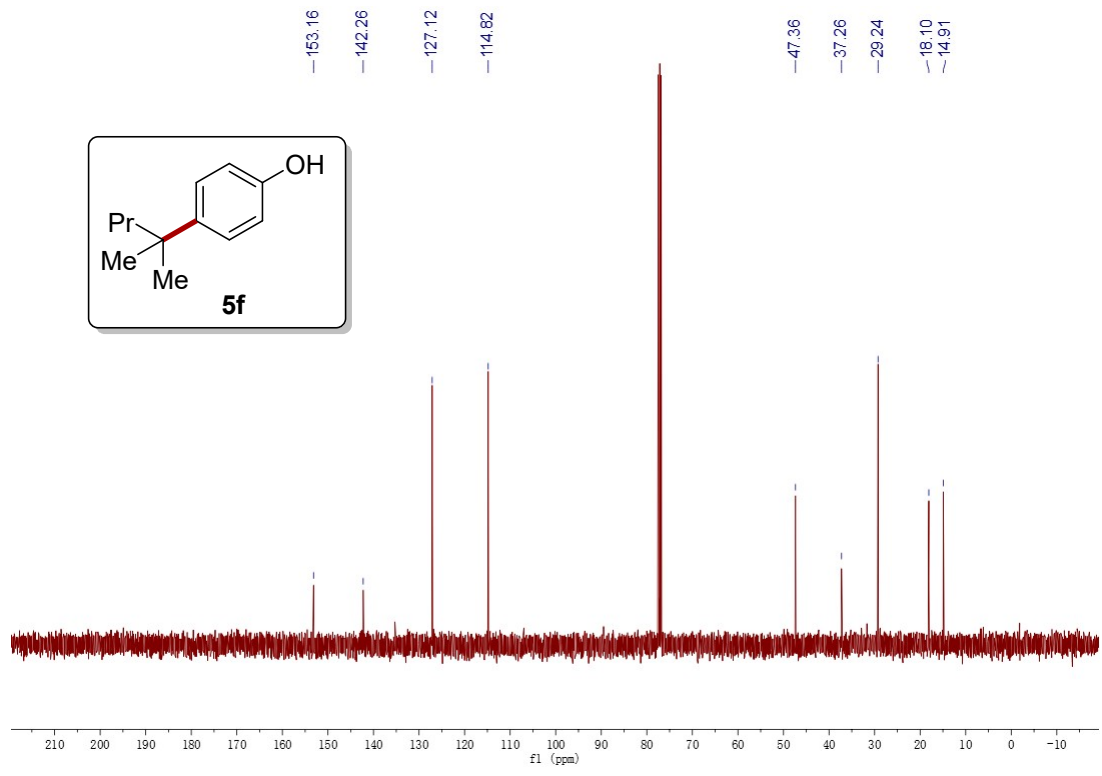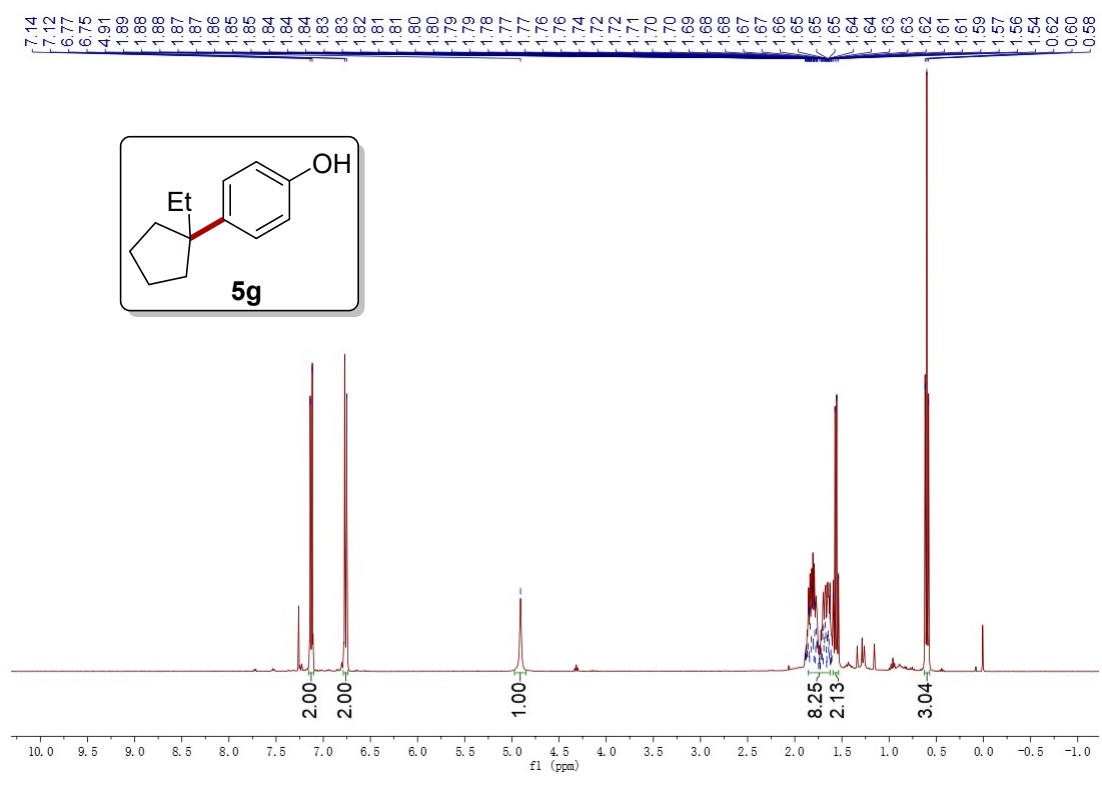



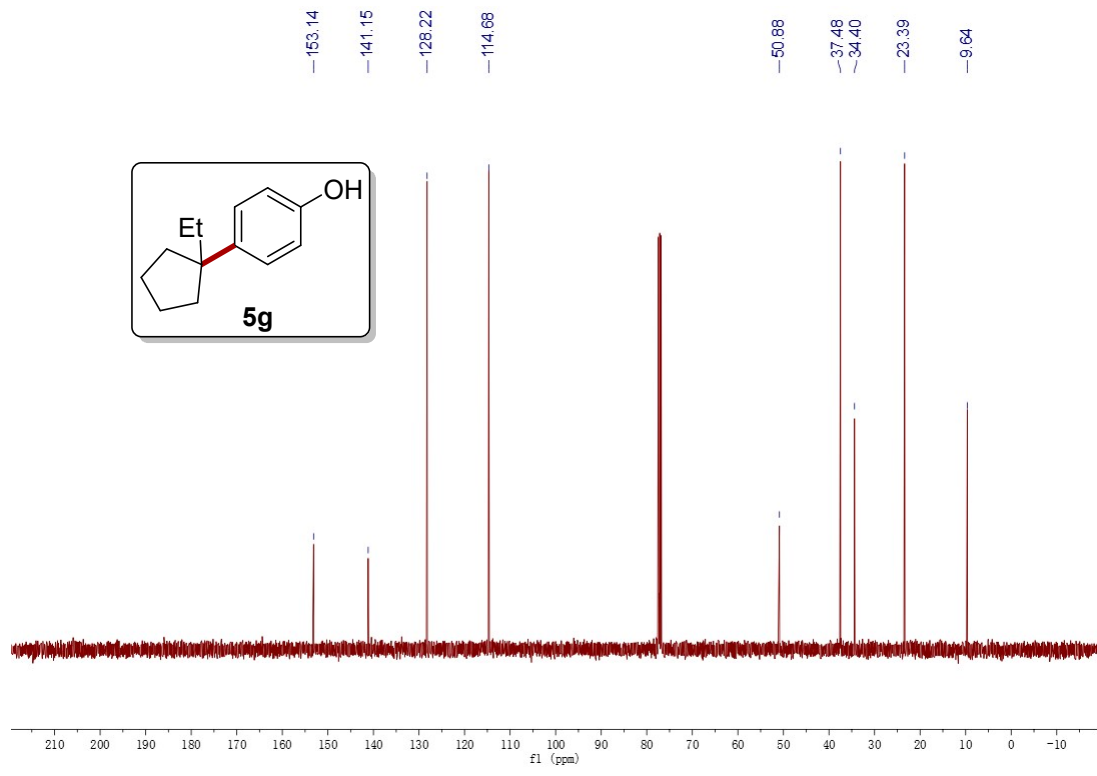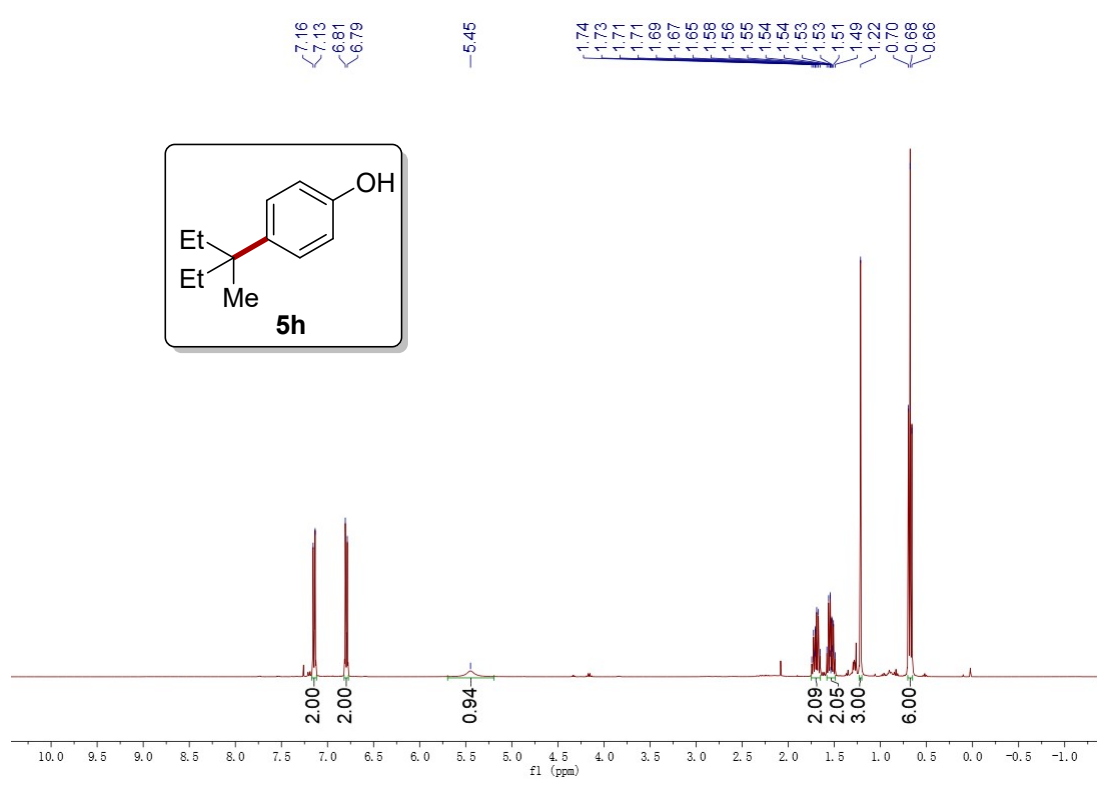

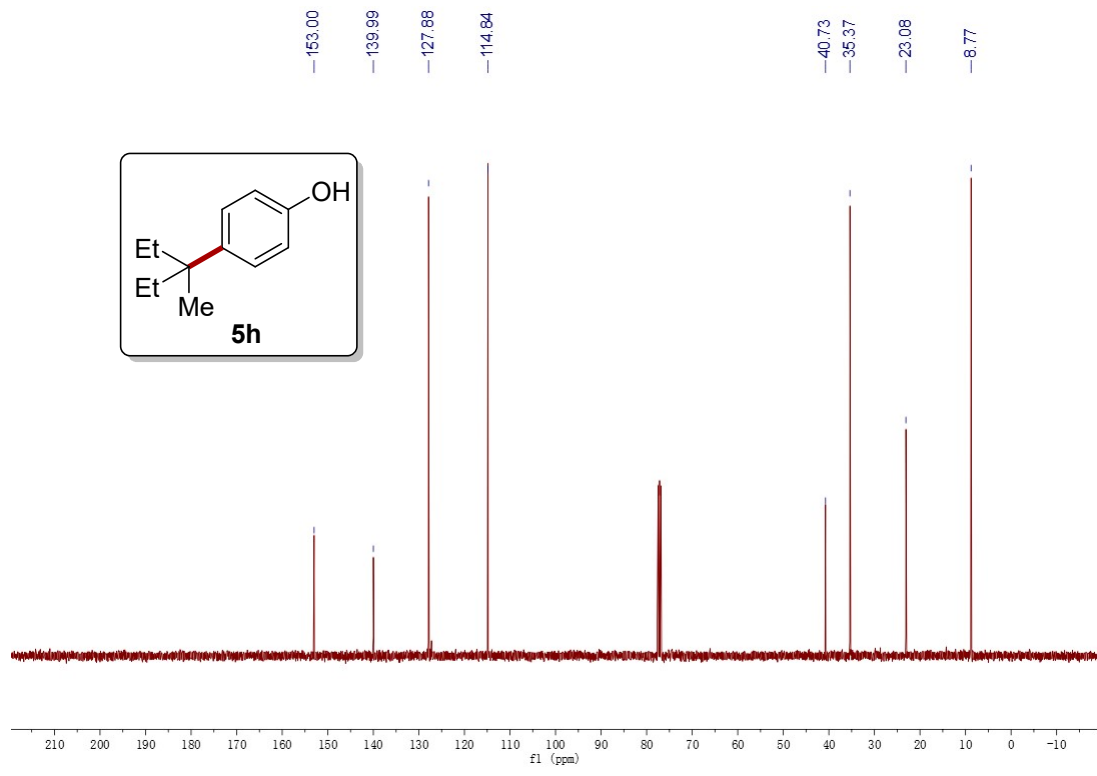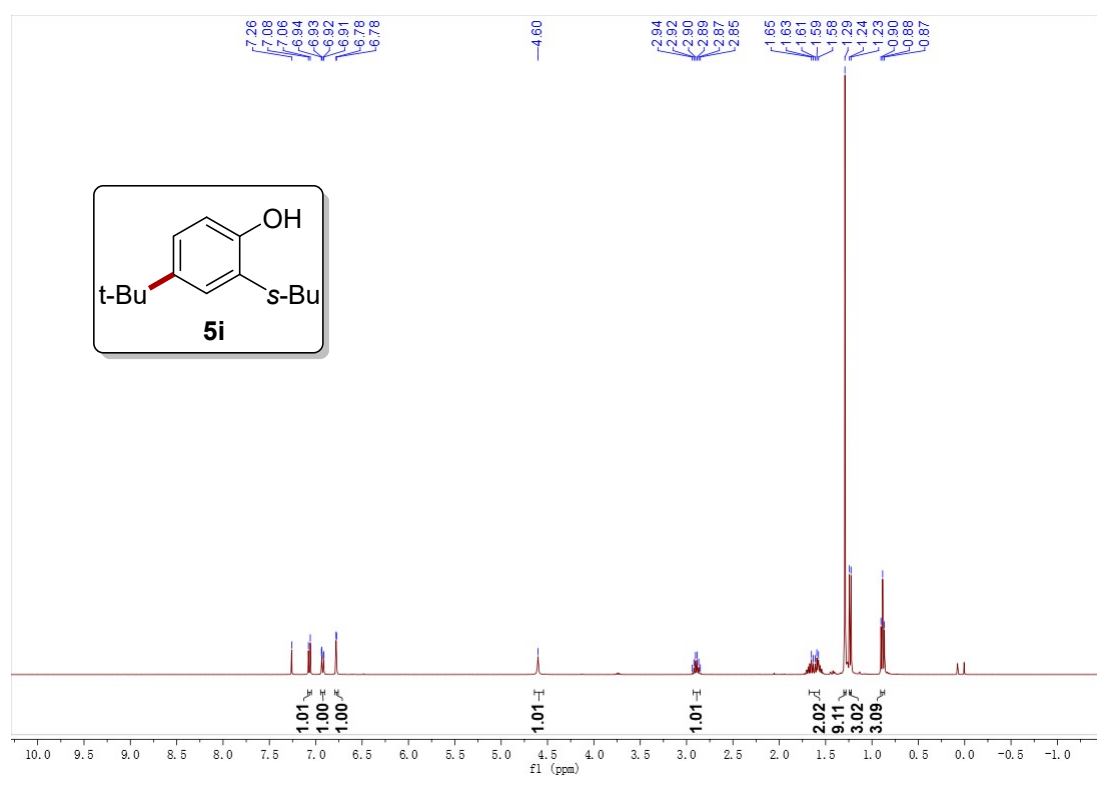

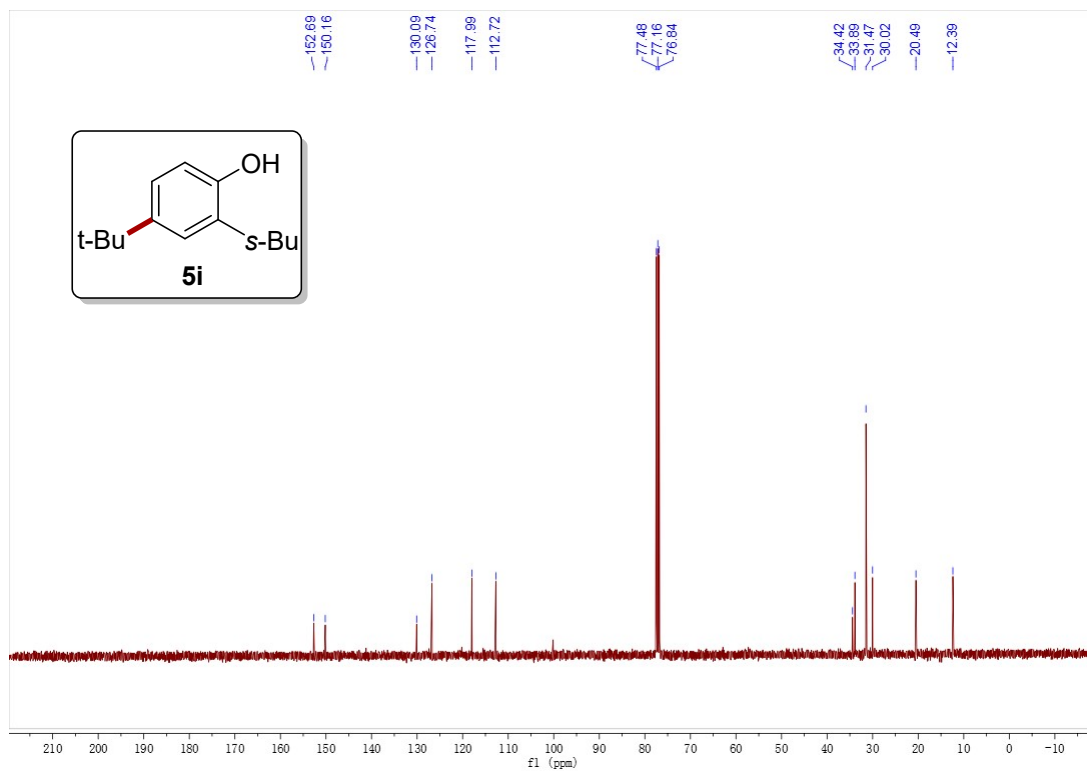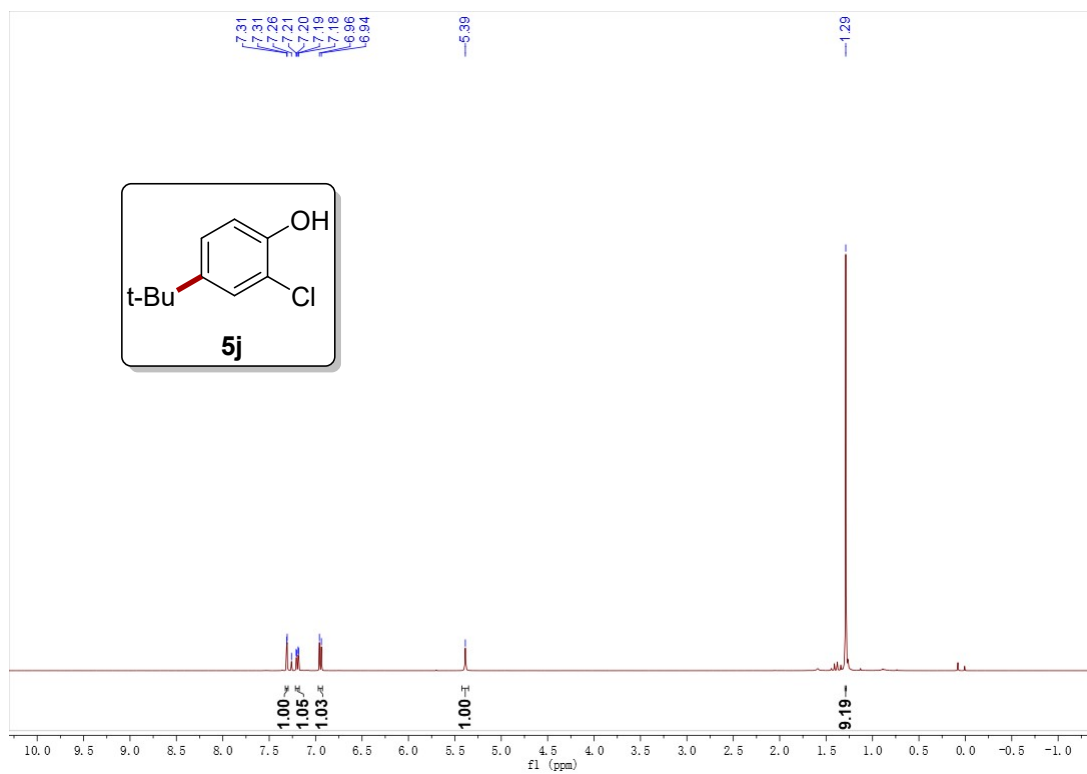

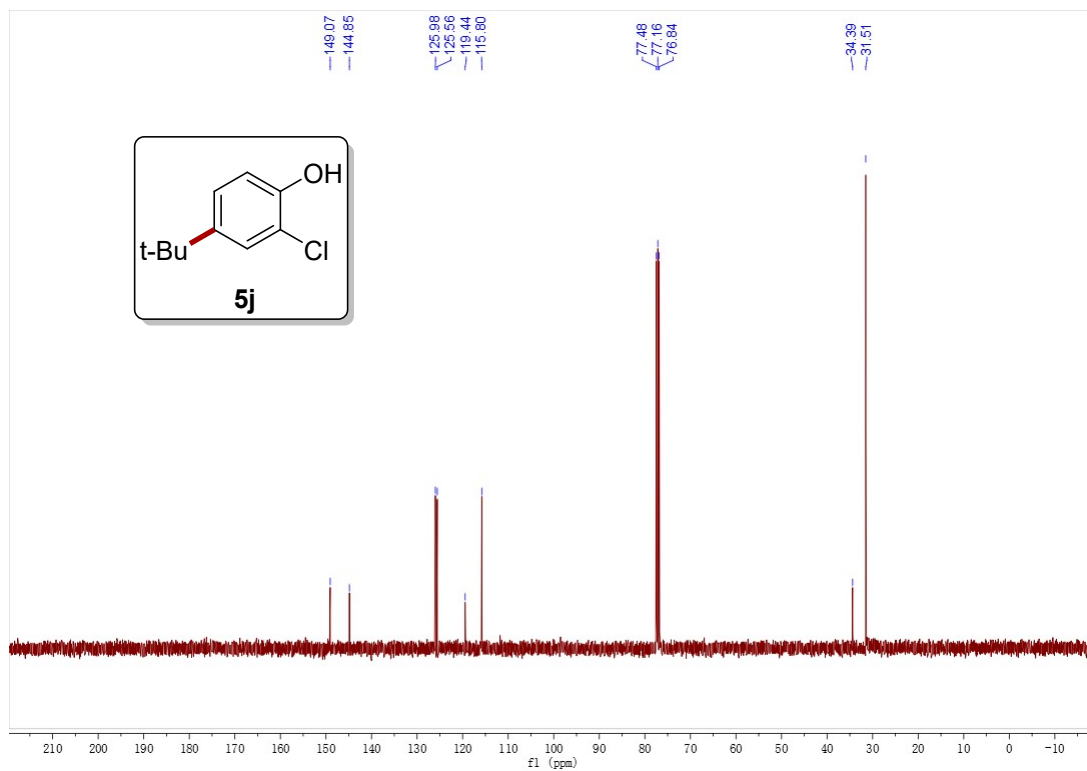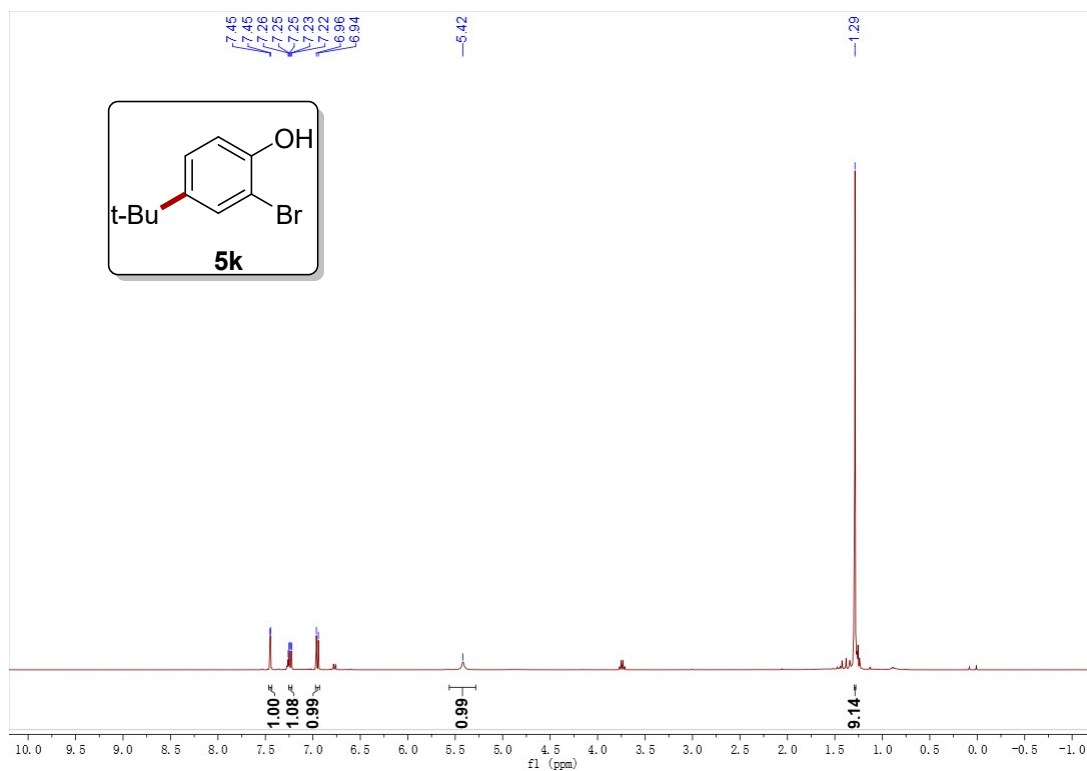

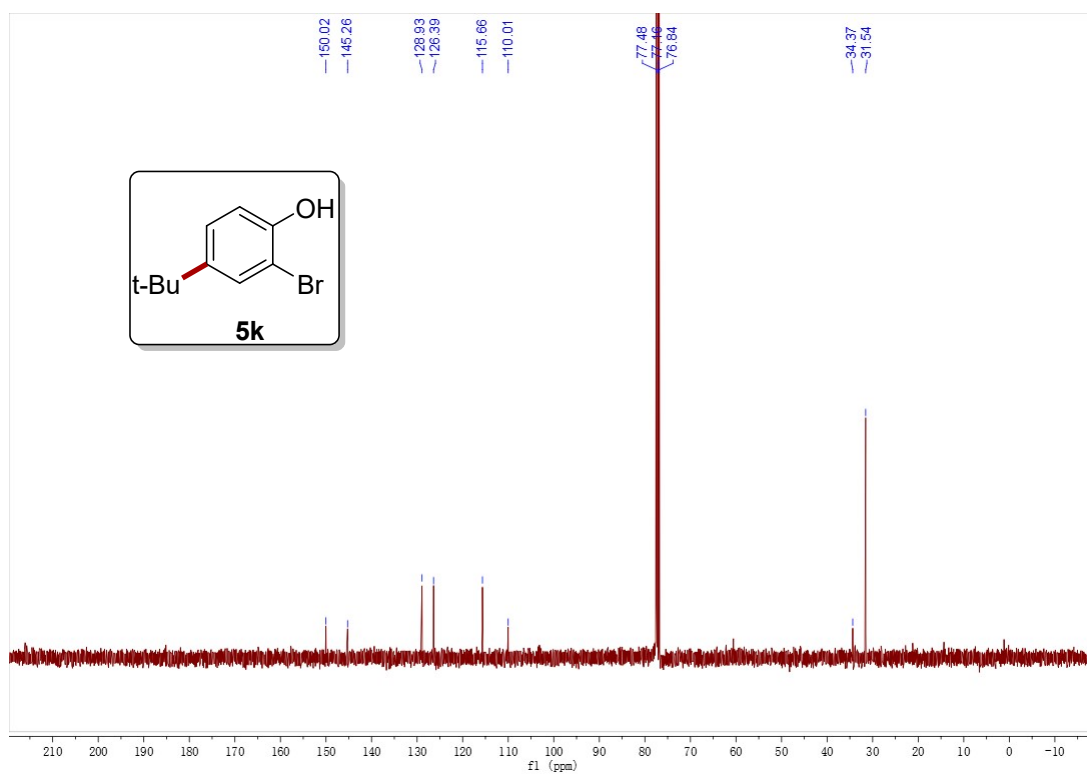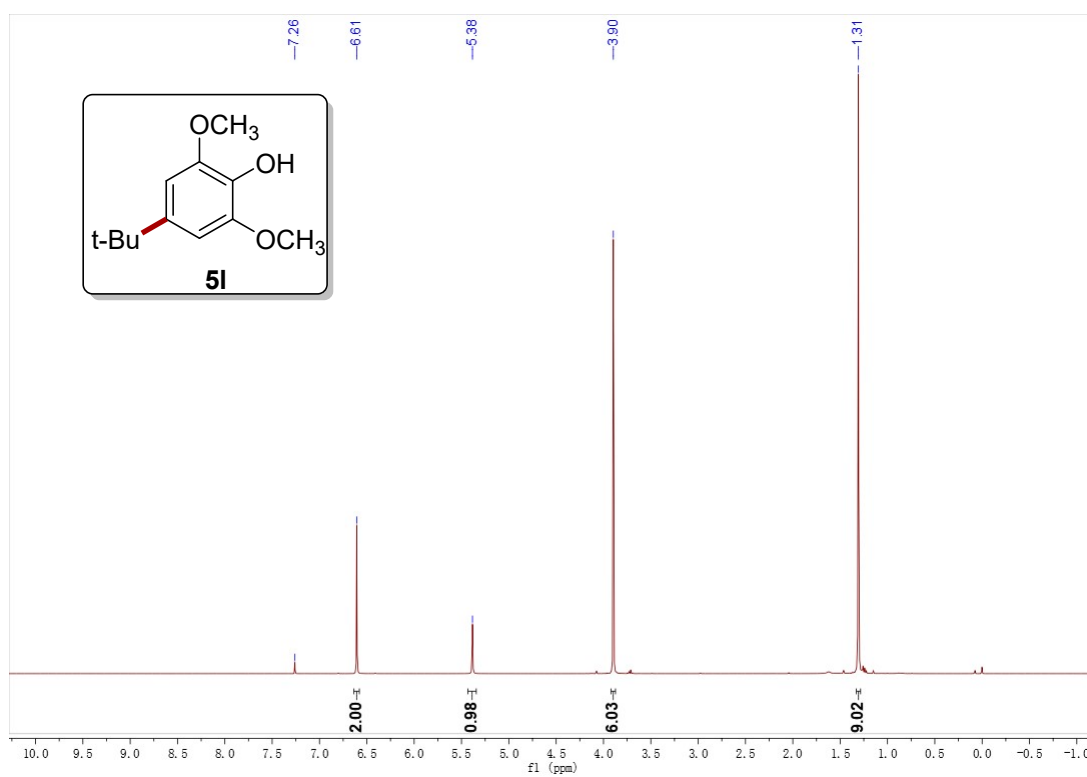

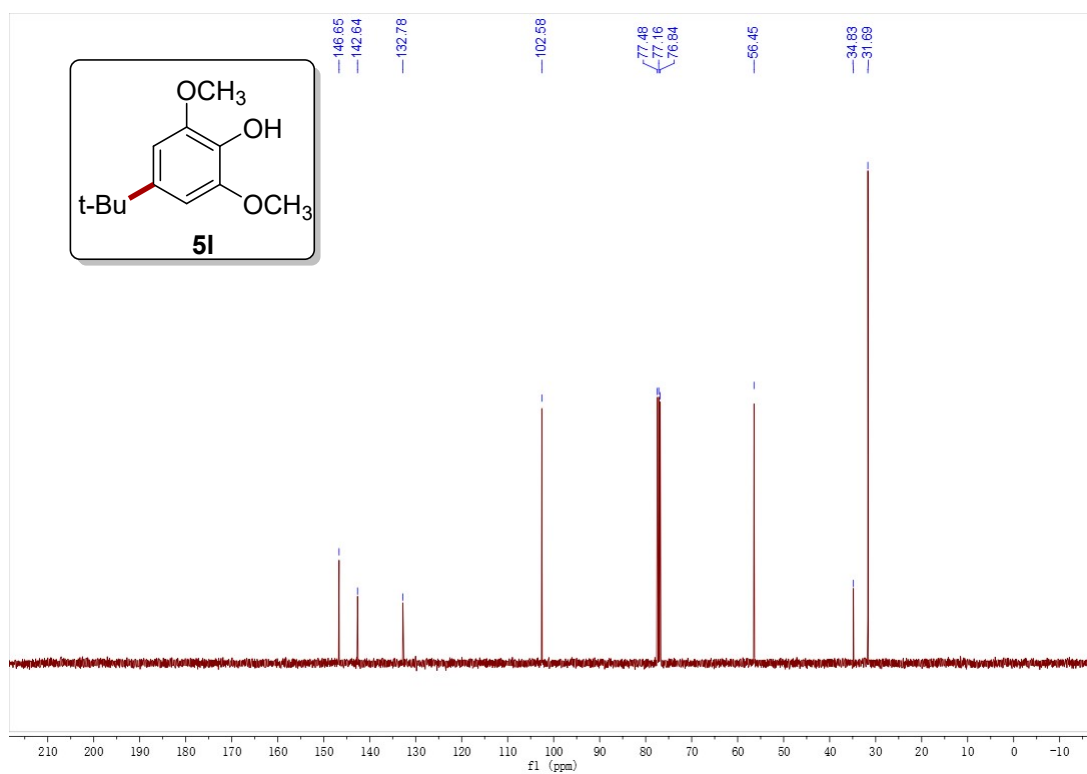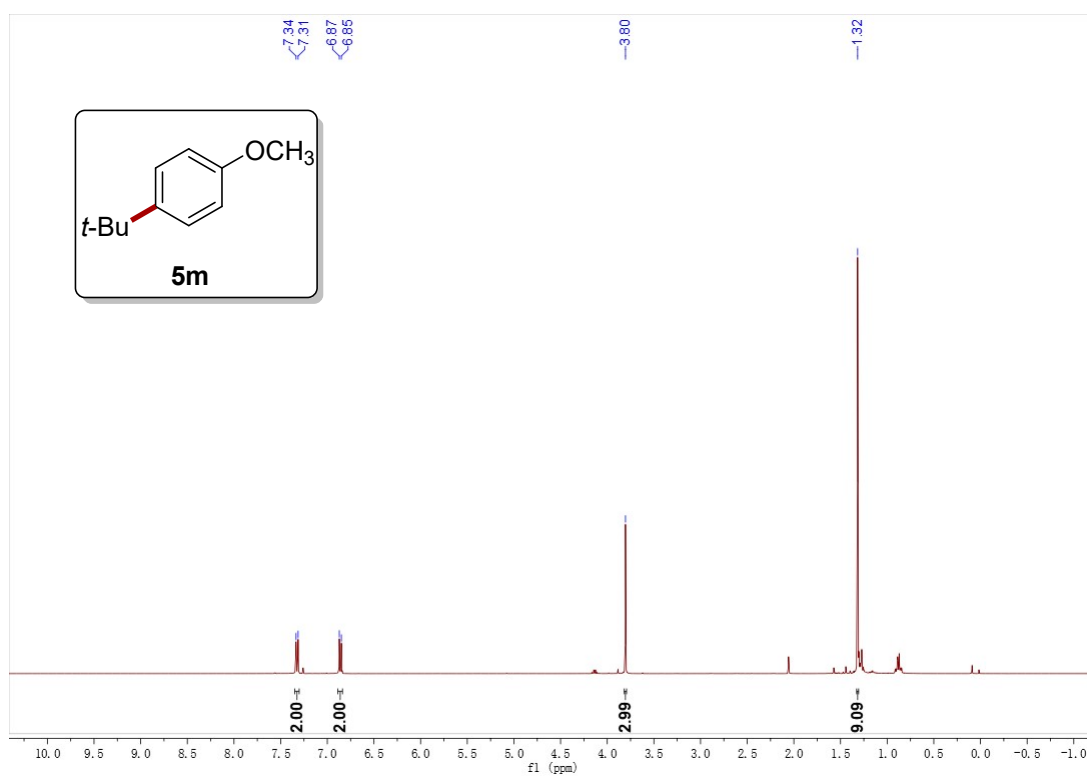

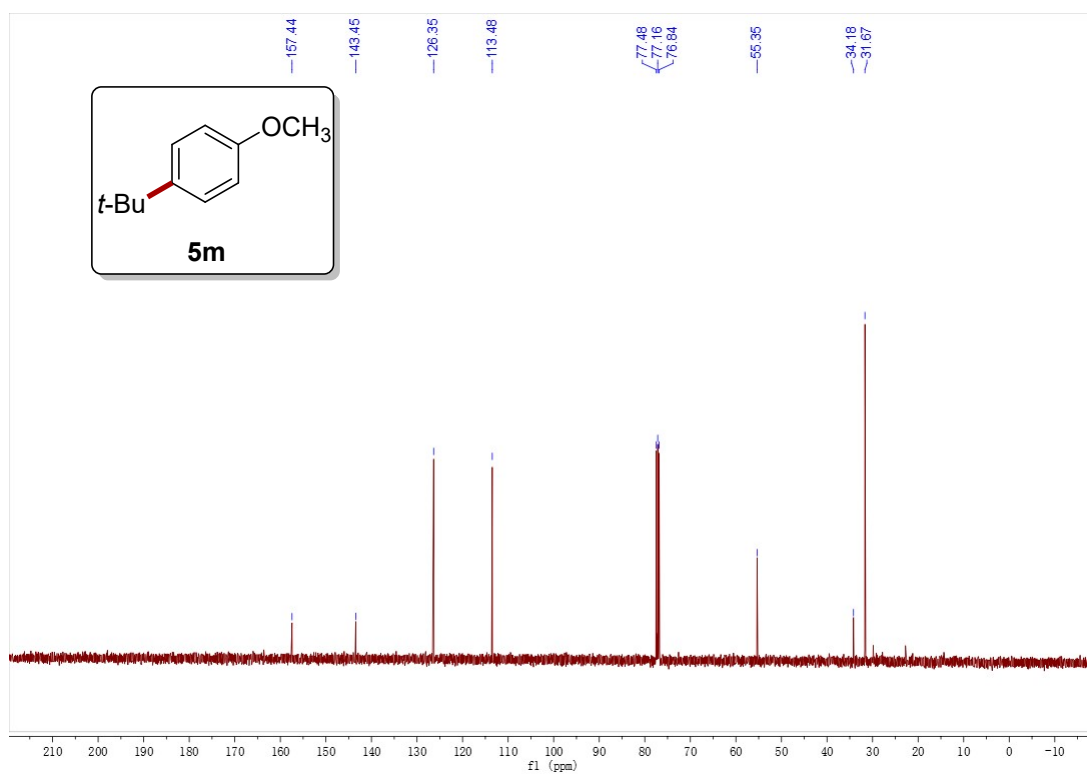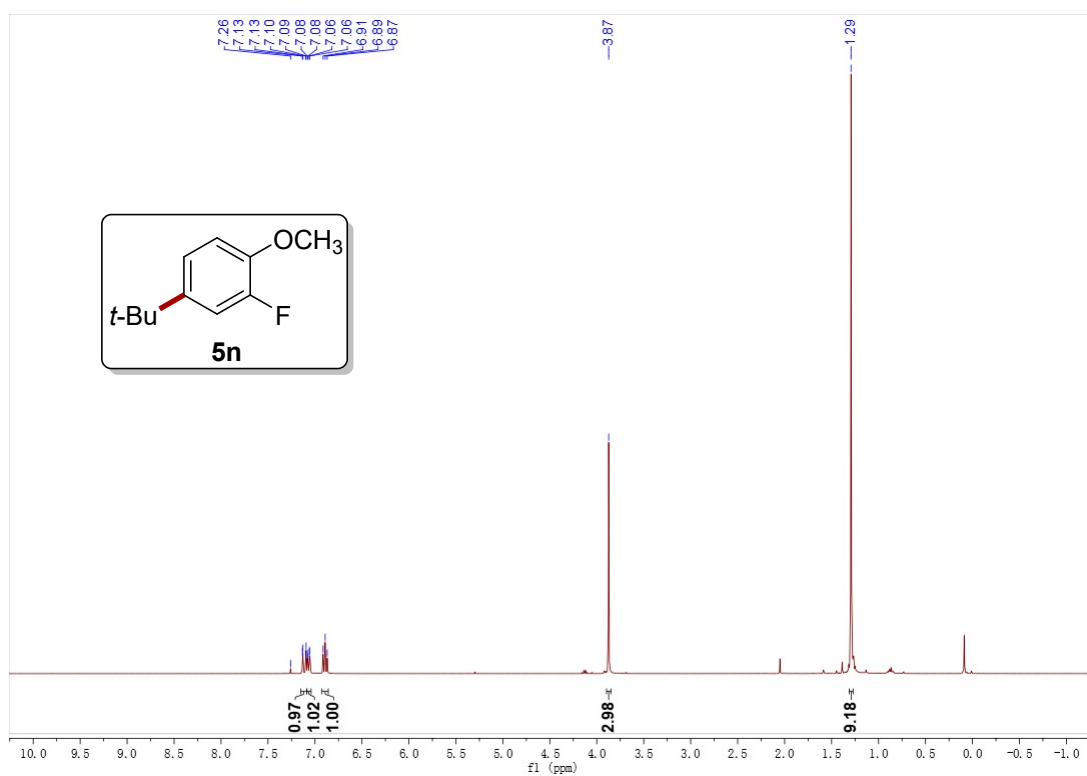

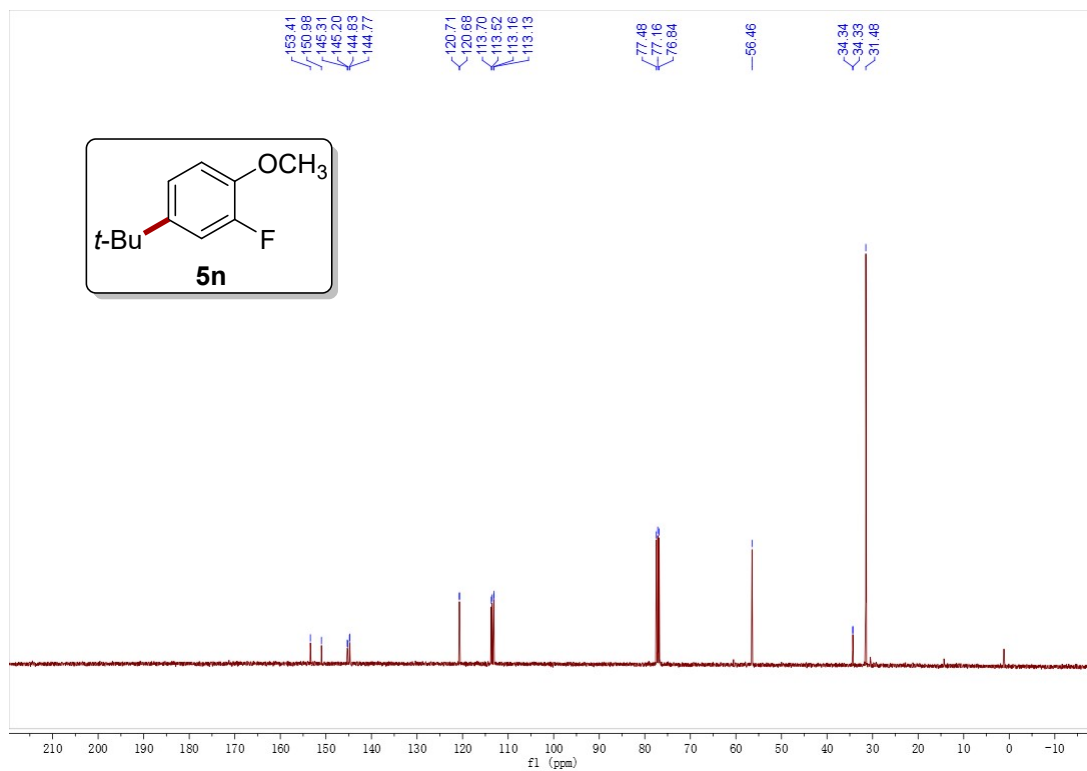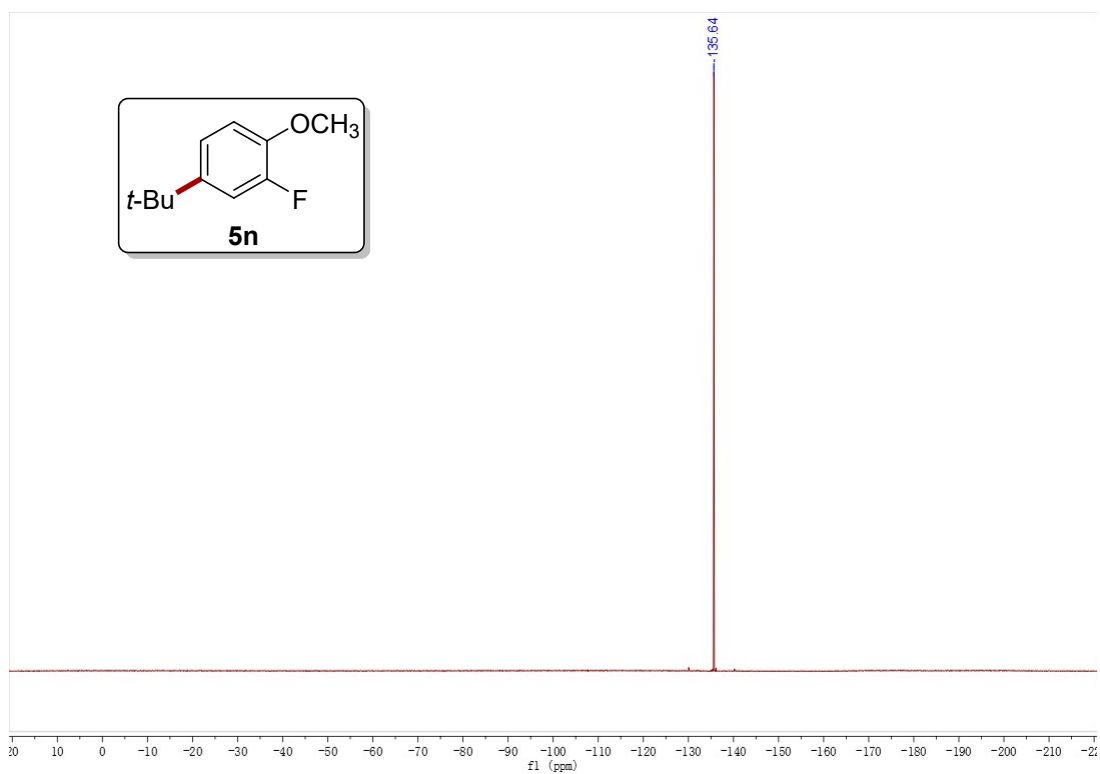



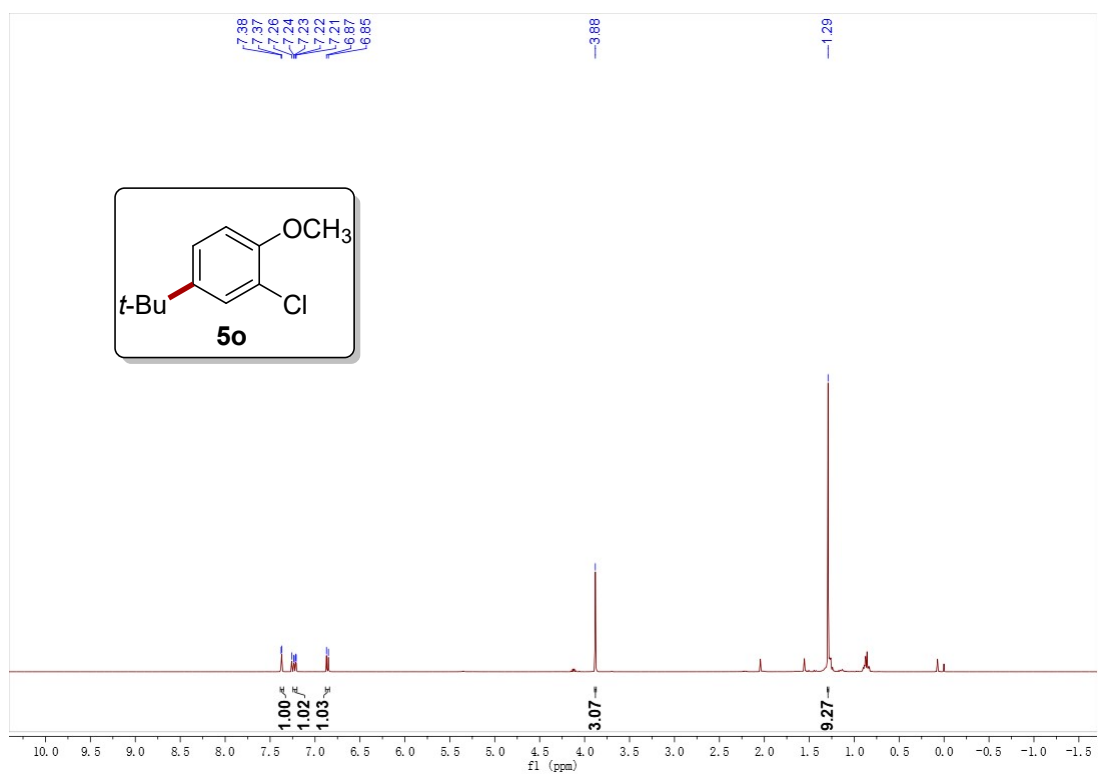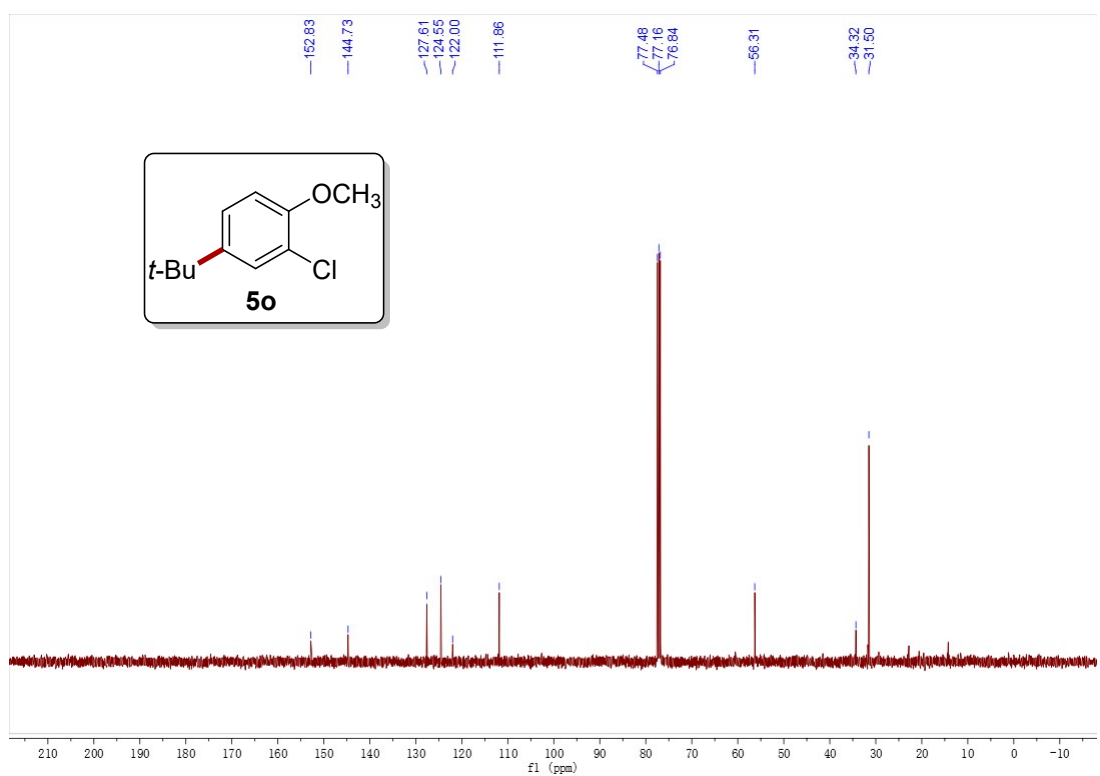

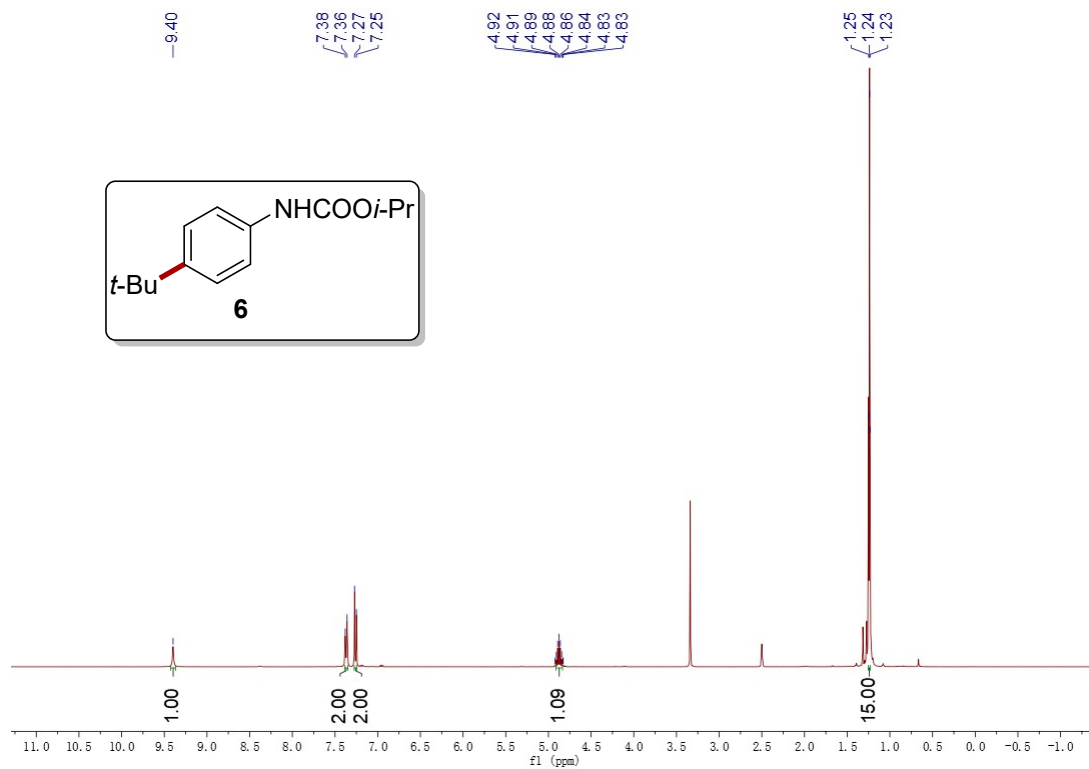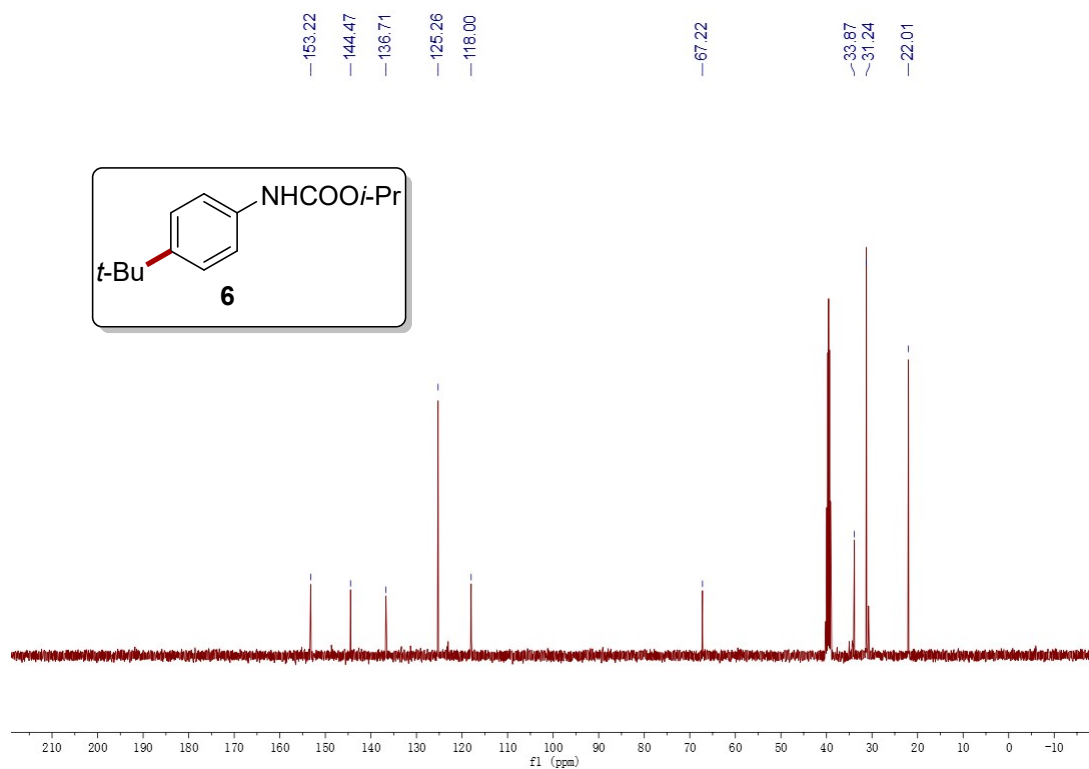

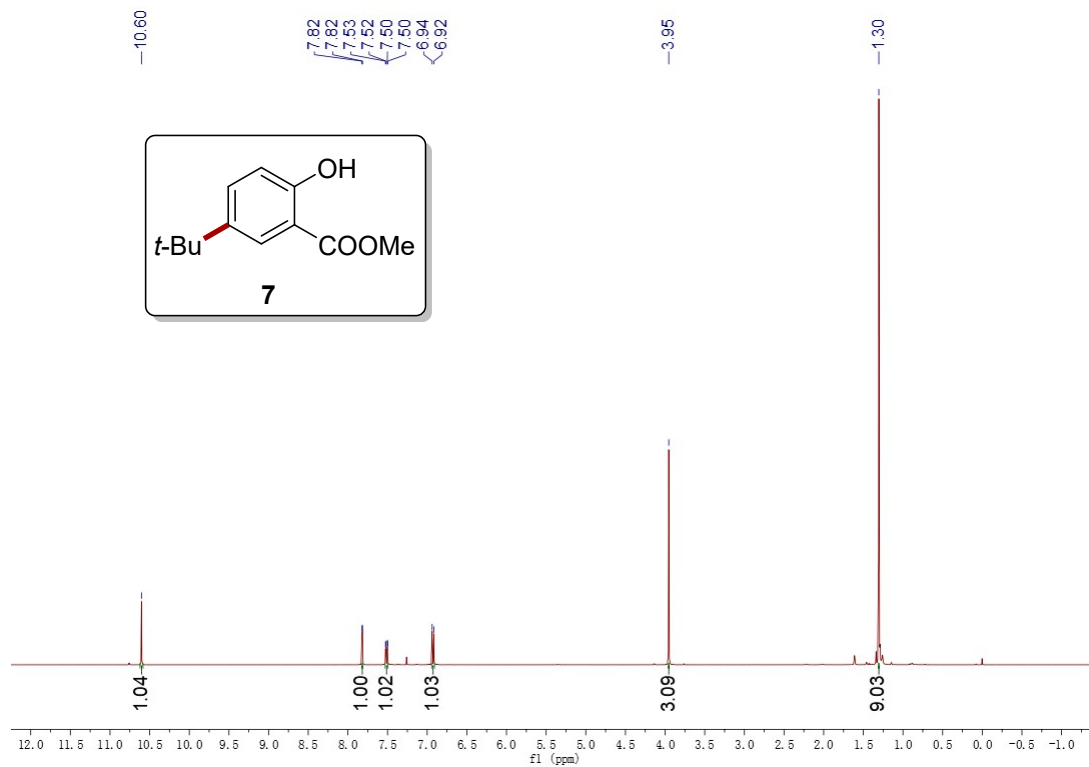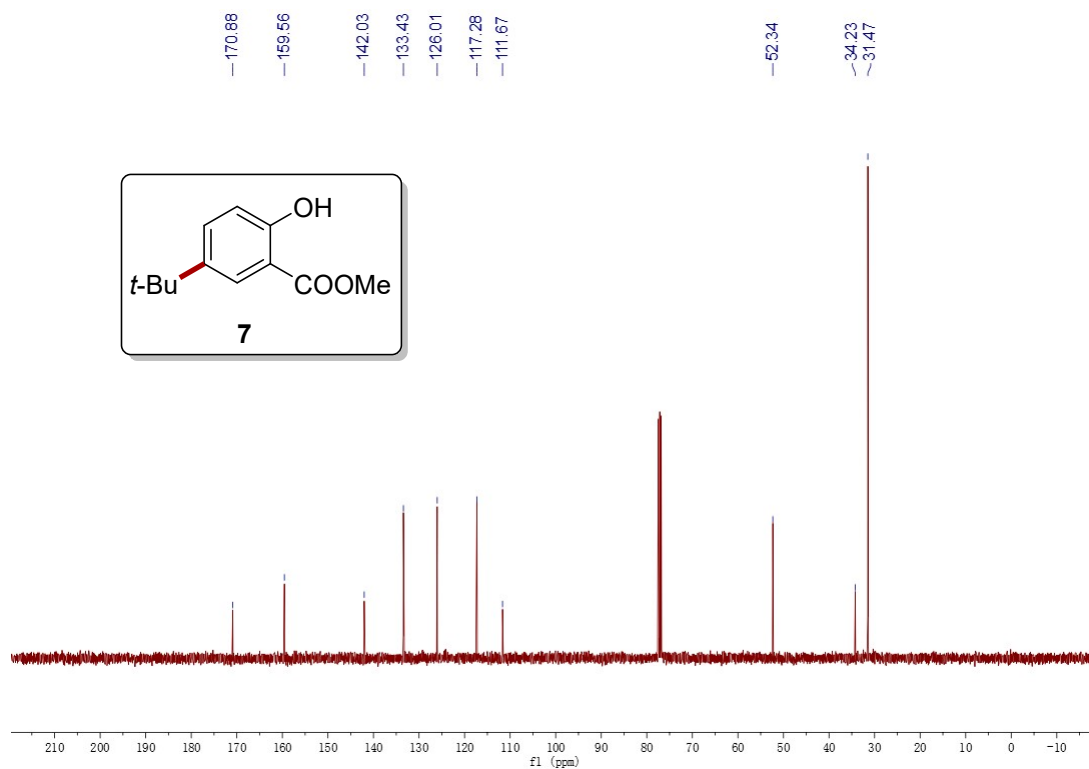

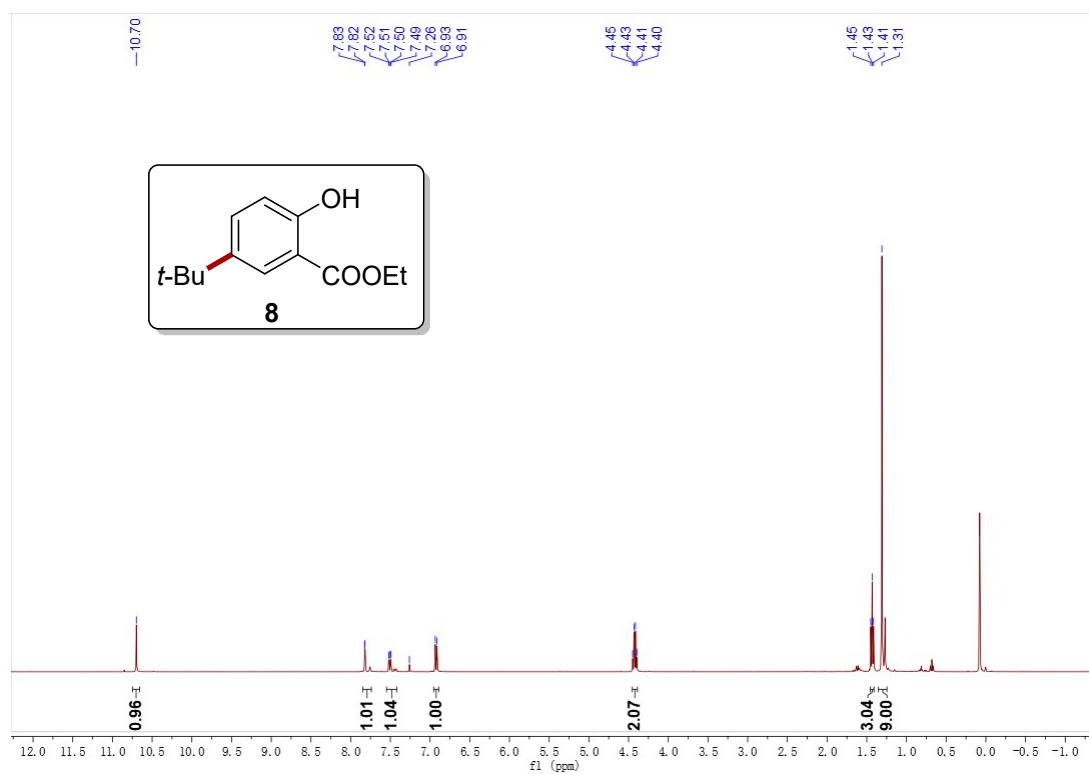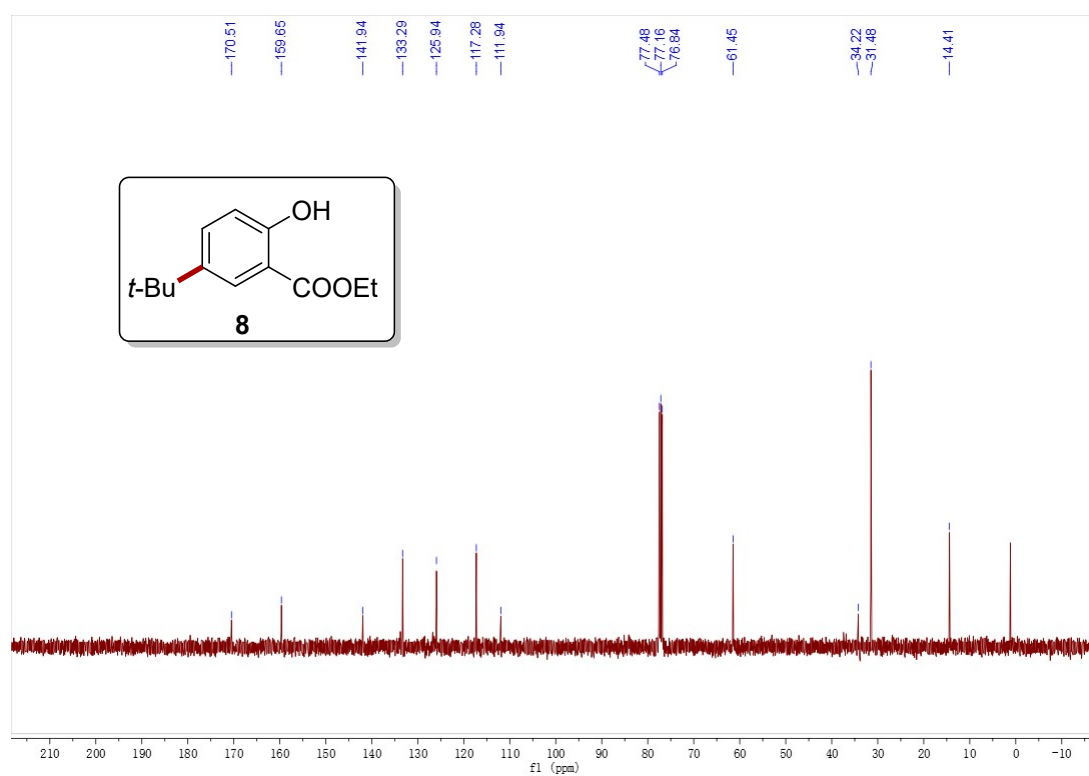

Supplement: d3qo00342f1.pdf [file d3qo00342f1.pdf]
